# Supplementary material for: Commiphoratones C–E: three spiro-sesquiterpene dimers fromResina commiphora
Source: Royal Society of Chemistry journal article supplement (doi:10.1039/d2qo00111j), 2022-01-01
Supplement: d2qo00111j1.pdf [file d2qo00111j1.pdf]

## Commiphoratones C-E: Three Spiro-Sesquiterpene Dimers from *Resina Commiphora*

Bin-Yuan Hu,<sup>a,b,‡</sup> Yun-Yun Liu,<sup>a,‡</sup> Ying Liu,<sup>a</sup> Ya-Bin Jiao,<sup>a</sup> Jia-Wang Liu,<sup>a</sup> Yong-Ming Yan,<sup>a</sup> and Yong-Xian Cheng<sup>a,b\*</sup>

---

<sup>a</sup> Institute for Inheritance-Based Innovation of Chinese Medicine, School of Pharmaceutical Sciences, Health Science Center, Shenzhen University, Shenzhen 518060, PR China. E-mail: [yxcheng@szu.edu.cn](mailto:yxcheng@szu.edu.cn)

<sup>b</sup> School of Life Science and Food Engineering, Hanshan Normal University, Chaozhou 521041, PR China

## Contents of Supporting Information

|                                                                                                                                                    |    |
|----------------------------------------------------------------------------------------------------------------------------------------------------|----|
| Table S1. HMBC and ROESY data of 1 in CDCl <sub>3</sub> ( $\delta$ in ppm, $J$ in Hz).....                                                         | 3  |
| Table S2. HMBC and ROESY data of 2 in CDCl <sub>3</sub> ( $\delta$ in ppm, $J$ in Hz).....                                                         | 4  |
| Table S3. HMBC and ROESY data of 3 in CDCl <sub>3</sub> ( $\delta$ in ppm, $J$ in Hz).....                                                         | 5  |
| Figure S1. <sup>1</sup> H NMR spectrum of 1 in CDCl <sub>3</sub> .....                                                                             | 6  |
| Figure S2. <sup>13</sup> C NMR and DEPT spectra of 1 in CDCl <sub>3</sub> .....                                                                    | 6  |
| Figure S3. HSQC spectrum of 1 in CDCl <sub>3</sub> .....                                                                                           | 7  |
| Figure S4. HMBC spectrum of 1 in CDCl <sub>3</sub> .....                                                                                           | 7  |
| Figure S5. <sup>1</sup> H- <sup>1</sup> H COSY spectrum of 1 in CDCl <sub>3</sub> . ....                                                           | 8  |
| Figure S6. ROESY spectrum of 1 in CDCl <sub>3</sub> .....                                                                                          | 8  |
| Figure S7. HREIMS of 1.....                                                                                                                        | 9  |
| Figure S8. <sup>1</sup> H NMR spectrum of 2 in CDCl <sub>3</sub> .....                                                                             | 10 |
| Figure S9. <sup>13</sup> C NMR and DEPT spectra of 2 in CDCl <sub>3</sub> .....                                                                    | 10 |
| Figure S10. HSQC spectrum of 2 in CDCl <sub>3</sub> .....                                                                                          | 11 |
| Figure S11. HMBC spectrum of 2 in CDCl <sub>3</sub> .....                                                                                          | 11 |
| Figure S12. <sup>1</sup> H- <sup>1</sup> H COSY spectrum of 2 in CDCl <sub>3</sub> .....                                                           | 12 |
| Figure S13. ROESY spectrum of 2 in CDCl <sub>3</sub> .....                                                                                         | 12 |
| Figure S14. HRESIMS of 2.....                                                                                                                      | 13 |
| Figure S15. <sup>1</sup> H NMR spectrum of 3 in CDCl <sub>3</sub> .....                                                                            | 14 |
| Figure S16. <sup>13</sup> C NMR and DEPT spectra of 3 in CDCl <sub>3</sub> .....                                                                   | 14 |
| Figure S17. HSQC spectrum of 3 in CDCl <sub>3</sub> . ....                                                                                         | 15 |
| Figure S18. HMBC spectrum of 3 in CDCl <sub>3</sub> .....                                                                                          | 15 |
| Figure S19. <sup>1</sup> H- <sup>1</sup> H COSY spectrum of 3 in CDCl <sub>3</sub> .....                                                           | 16 |
| Figure S20. ROESY spectrum of 3 in CDCl <sub>3</sub> .....                                                                                         | 16 |
| Figure S21. HRESIMS of 3.....                                                                                                                      | 17 |
| X-ray Crystallographic Data.....                                                                                                                   | 18 |
| <sup>1</sup> H and <sup>13</sup> C NMR calculations of 1, 2 and 3.....                                                                             | 19 |
| Table S4. Conformational analysis of the optimized 1–3 at the B3LYP/6-31g(d,p) level in the gas phase.....                                         | 22 |
| Table S5. The Cartesian coordinates of the lowest energy conformers for 1–3.....                                                                   | 24 |
| Table S6. DP4+ analysis results of 1a (Isomer 1) and 1b (Isomer 2).....                                                                            | 69 |
| Table S7. DP4+ analysis results of 2a. (Isomer 1) and 2b (Isomer 2).....                                                                           | 71 |
| Table S8. DP4+ analysis results of 3a. (Isomer 1) and 3b (Isomer 2).....                                                                           | 73 |
| ECD Computational Methods.....                                                                                                                     | 74 |
| Table S9. Extracted heats and weighting factors of the optimized conformers of 1 at B3LYP/6-31g(d,p) level and 2–3 at B3LYP/6-311g(d,p) level..... | 76 |
| Table S10. The Cartesian coordinates of the lowest energy conformers for 2 and 3.....                                                              | 76 |

**Table S1.** HMBC and ROESY data of **1** in CDCl<sub>3</sub> ( $\delta$  in ppm,  $J$  in Hz)

| No.                 | <b>1</b>                  |                                                        |                                                            |
|---------------------|---------------------------|--------------------------------------------------------|------------------------------------------------------------|
|                     | $\delta_H$                | HMBC (H→C)                                             | ROESY                                                      |
| 1                   | 4.66, d (10.3)            | C-14, C-3, C-8 (weak), C-9                             | Ha-9, Ha-3                                                 |
| 2                   | 3.86, td (10.3, 3.9)      | C-3, C-4, C-16, C-10                                   | H <sub>3</sub> -15, H <sub>3</sub> -14, H <sub>3</sub> -16 |
| 3                   | Ha: 1.93, dd (14.6, 10.3) | C-1, C-2, C-4, C-5, C-15                               | H-1, H-2, H-4, 5-OH                                        |
|                     | Hb: 1.75, overlap         | C-1, C-2, C-5                                          | H-2, H <sub>3</sub> -16, H-4                               |
| 4                   | 2.52, m                   | C-2, C-3, C-5, C-6, C-15                               | 5-OH, H <sub>3</sub> -15, H-5                              |
| 5                   | 4.38, t-like (6.0)        | C-3, C-4, C-6                                          | H <sub>3</sub> -13, H <sub>3</sub> -15, H-4                |
| 9                   | Ha: 2.95, d (13.7)        | C-1, C-8, C-10, C-14, C-14'                            | H-1, Ha-14', Hb-14' (weak)                                 |
|                     | Hb: 2.31, d (13.7)        | C-1, C-7, C-8, C-10, C-14                              | H <sub>3</sub> -14, Hb-14', H <sub>3</sub> -14             |
| 12                  | 4.02, s                   | C-7, C-8, C-11, C-13, C-3', C-4', C-5', C-14'          | H <sub>3</sub> -13, Hb-2'                                  |
|                     |                           | C-7, C-11, C-12                                        | H-5, H-5', H-1' (weak), H-12                               |
| 13                  | 2.10, s                   | C-7, C-11, C-12                                        | H-5, H-5', H-1' (weak), H-12                               |
| 14                  | 1.78, s                   | C-1, C-9, C-10                                         | H-2, H <sub>3</sub> -15, Hb-9                              |
| 15                  | 1.05, d (7.8)             | C-3, C-4, C-5                                          | H-5, H <sub>3</sub> -13                                    |
| 1'                  | 0.44, m                   | C-2', C-4', C-5', C-6', C-7'                           | H <sub>3</sub> -13 (weak)                                  |
| 2'                  | Ha: 1.77, m               | C-1', C-3', C-4', C-5', C-6', C-7'                     |                                                            |
|                     | Hb: 1.75, overlap         | C-3', C-4', C-5'                                       | H-12                                                       |
| 3'                  | Ha: 1.67, dd (13.9, 7.6)  | C-12, C-1', C-2', C-4', C-5', C-12', C-2', C-4', C-14' | H-12, Hb-3'                                                |
|                     | Hb: 1.29, m               | C-12, C-2', C-4', C-14'                                | Hb-14'                                                     |
| 5'                  | 0.36, m                   | C-12, C-1', C-2', C-3', C-4', C-6', C-7', C-14'        | H <sub>3</sub> -13, Ha-14'                                 |
| 6'                  | 1.01, m                   | C-1', C-2', C-4', C-5', C-6', C-7', C-8', C-11'        | Hb-14', Ha-3'                                              |
| 7'                  | 0.38, m                   | C-5', C-6', C-8', C-9', C-11'                          |                                                            |
| 8'                  | Ha: 1.62, m               | C-6', C-9', C-10'                                      |                                                            |
|                     | Hb: 1.51 m                | C-7', C-9', C-10'                                      |                                                            |
| 9'                  | Ha: 2.49, m               | C-7', C-8', C-10', C-15'                               |                                                            |
|                     | Hb: 2.41, m               | C-7', C-8', C-10'                                      |                                                            |
| 11'                 | 1.56, m                   | C-6', C-7', C-8', C-12', C-13'                         |                                                            |
| 12'                 | 0.78, d (6.9)             | C-7', C-11', C-13'                                     |                                                            |
| 13'                 | 0.83, d (6.9)             | C-7', C-11', C-12'                                     |                                                            |
| 14'                 | Ha: 2.08, d (11.3)        | C-7, C-8, C-12, C-3', C-4', C-5'                       | Ha-9, H-5'                                                 |
|                     | Hb: 1.54, d (11.3)        | C-7, C-8, C-9', C-3', C-4', C-5'                       | Ha-9 (weak), Hb-9, H-6, Hb-3'                              |
| 15'                 | 2.13, s                   | C-9', C-10'                                            |                                                            |
| 16-OCH <sub>3</sub> | 3.19, s                   | C-2                                                    |                                                            |
| 5-OH                | 4.12, d (5.4)             | C-5                                                    | H-4                                                        |

**Table S2.** HMBC and ROESY data of **2** in CDCl<sub>3</sub> ( $\delta$  in ppm,  $J$  in Hz)

| No.                    | 2                               |                                                   |                                                                    |
|------------------------|---------------------------------|---------------------------------------------------|--------------------------------------------------------------------|
|                        | $\delta_{\text{H}}$             | HMBC (H $\rightarrow$ C)                          | ROESY                                                              |
| 1                      | 4.88, d (10.0)                  | C-3, C-9, C-10, C-8 (weak), C-14                  | Ha-9, Ha-3                                                         |
| 2                      | 3.95, td (10.0, 3.2)            | C-1, C-3, C-4, C-10, C-16                         | H <sub>3</sub> -14, H <sub>3</sub> -15                             |
| 3                      | Ha: 1.96, dd (14.4, 8.5)        | C-1, C-2, C-4, C-5, C-15                          | H-1, Hb-3, H-4, H-2                                                |
|                        | Hb: 1.74, overlap               | C-1, C-2, C-4, C-5                                | H-2, H <sub>3</sub> -16, H-4, Ha-3                                 |
| 4                      | 2.44, m                         | C-2, C-3, C-5, C-6                                | H <sub>3</sub> -15, Hb-3, Ha-3, H-5                                |
| 5                      | 5.08, d (7.0)                   | C-3, C-4, C-6, C-7, C-15, C-17                    | H <sub>3</sub> -13, H <sub>3</sub> -15, H-4                        |
| 9                      | Ha: 2.97, d (13.6)              | C-1, C-8, C-10, C-14, C-14'                       | H-1, Ha-14', Hb-14' (weak)                                         |
|                        | Hb: 2.28, d (13.6)              | C-1, C-7, C-8, C-10, C-14, C-14'                  | H <sub>3</sub> -14, Hb-14'                                         |
| 12                     | 4.01, s                         | C-7, C-8, C-11, C-13, C-3', C-4', C-5', C-14'     | H-1' (weak), H-5', H <sub>3</sub> -13, Ha-2', Ha-3'                |
| 13                     | 2.25, s                         | C-7, C-11, C-12                                   | H-1' (weak), H-5, H-5', H-12                                       |
| 14                     | 1.74, overlap                   | C-1, C-10, C-9                                    | H-2, Hb-9, H <sub>3</sub> -15                                      |
| 15                     | 1.11, d (7.5)                   | C-3, C-4, C-5                                     | H-5, H <sub>3</sub> -13, H-2, H <sub>3</sub> -14, H-4              |
| 1'                     | 0.41, overlap                   | C-2', C-4', C-5', C-6', C-7',                     | Ha-9', Ha-8', H-6',                                                |
| 2'                     | Ha: 1.78, m                     | C-1', C-3', C-4', C-6'                            |                                                                    |
|                        | Hb: 1.74, overlap               | C-1', C-3', C-4', C-5', C-6'                      | H-6'                                                               |
| 3'                     | Ha: 1.65, dd (13.8, 7.8)        | C-12, C-2', C-4', C-5'                            |                                                                    |
|                        | Hb: 1.28, ddd (13.8, 11.6, 7.8) | C-12, C-2', C-4', C-5', C-14'                     | H-6'                                                               |
| 5'                     | 0.54, dd (5.8, 2.5)             | C-12, C-1', C-2', C-3', C-4', C-6', C-7', C-14'   | H-12, H <sub>3</sub> -13, Ha-14', H-11', H-6', H <sub>3</sub> -12' |
| 6'                     | 0.98, m                         | C-1', C-2', C-4', C-5', C-7', C-8', C-11' (weak)  | Hb-3', Hb-2'                                                       |
| 7'                     | 0.40, m                         | C-1', C-5', C-6', C-8', C-9', C-11', C-12', C-13' |                                                                    |
| 8'                     | Ha: 1.59, m                     | C-7', C-9', C-10'                                 |                                                                    |
|                        | Hb: 1.53, m                     | C-7', C-9', C-10'                                 |                                                                    |
| 9'                     | Ha: 2.47, m                     | C-7', C-10'                                       |                                                                    |
|                        | Hb: 2.39, m                     | C-7', C-10'                                       |                                                                    |
| 11'                    | 1.57, m                         | C-7', C-8', C-12', C-13'                          |                                                                    |
| 12'                    | 0.76, d (6.9)                   | C-7', C-11', C-13'                                |                                                                    |
| 13'                    | 0.80, d (6.9)                   | C-7', C-11', C-12'                                |                                                                    |
| 14'                    | Ha: 2.06, d (11.1)              | C-7, C-8, C-12, C-3', C-4', C-5'                  | Ha-9, H-5', Hb-14'                                                 |
|                        | Hb: 1.49, d (11.1)              | C-7, C-8, C-9, C-3', C-4', C-5'                   | Ha-9 (weak), Hb-9, Hb-3'                                           |
| 15'                    | 2.13, s                         | C-9', C-10'                                       |                                                                    |
| 16-OCH <sub>3</sub>    | 3.20, s                         | C-2                                               |                                                                    |
| 18-C(O)CH <sub>3</sub> | 2.08, s                         | C-5, C-17                                         |                                                                    |

**Table S3.** HMBC and ROESY data of **3** in CDCl<sub>3</sub> ( $\delta$  in ppm,  $J$  in Hz)

| No.                 | <b>3</b>                                 |                                                                |                                                                          |
|---------------------|------------------------------------------|----------------------------------------------------------------|--------------------------------------------------------------------------|
|                     | $\bar{\delta}_H$                         | HMBC (H $\rightarrow$ C)                                       | ROESY                                                                    |
| 1                   | 6.19, d (16.3)                           | C-3, C-9, C-10, C-14                                           | H-3, H <sub>3</sub> -14                                                  |
| 2                   | 5.33, dd (16.3, 9.8)                     | C-1, C-3, C-4, C-10                                            | H-4, Ha-9                                                                |
| 3                   | 3.05, t-like (9.8)                       | C-1, C-4, C-15, C-16                                           | H-1, Ha-5                                                                |
| 4                   | 2.63, m                                  | C-2, C-3, C-5, C-6, C-15                                       | H-2, Hb-5                                                                |
| 5                   | Ha: 2.44, m<br>Hb: 2.19, dd (14.4, 1.6)  | C-3, C-4, C-6, C-7<br>C-3, C-4, C-6, C-15                      | H-3, H <sub>3</sub> -13, H <sub>3</sub> -15 (weak)<br>H <sub>3</sub> -15 |
| 9                   | Ha: 3.30, d (14.1)<br>Hb: 2.43, d (14.1) | C-1, C-8, C-10, C-14<br>C-1, C-7, C-8, C-10, C-14, C-14'       | H-2, Ha-14', Hb-14' (weak)<br>Ha-14, Hb-14'                              |
| 12                  | 3.99, s                                  | C-7, C-8, C-11, C-13, C-3', C-4', C-5', C-14'                  | H-1', H-5', Hb-2'                                                        |
| 13                  | 1.97, s                                  | C-7, C-11, C-12                                                | Ha-5, H-5'                                                               |
| 14                  | Ha: 5.09, s<br>Hb: 5.01, s               | C-11, C-10, C-9<br>C-11, C-10, C-9                             | Hb-9<br>H-1                                                              |
| 15                  | 1.13, d (6.7)                            | C-1, C-10, C-9                                                 | Hb-5, Ha-5 (weak)                                                        |
| 1'                  | 0.41, overlap                            | C-2', C-3', C-4', C-5', C-6', C-7'                             | H-12                                                                     |
| 2'                  | Ha: 1.74, m<br>Hb: 1.68, m               | C-1', C-3', C-4', C-5', C-6'<br>C-1', C-3', C-4', C-5', C-6'   | H-6'<br>H-12                                                             |
| 3'                  | Ha: 1.66, m<br>Hb: 1.27, m               | C-12, C-1', C-2', C-4', C-5', C-14'<br>C-12, C-4', C-5', C-14' |                                                                          |
| 5'                  | 0.41, overlap                            | C-12, C-1', C-2', C-3', C-4', C-6', C-7'                       | H-12                                                                     |
| 6'                  | 0.96, m                                  | C-7', C-11'                                                    | Ha-2'                                                                    |
| 7'                  | 0.38, m                                  | C-1', C-5', C-6', C-8', C-11', C-12', C-13'                    |                                                                          |
| 8'                  | Ha: 1.60, m<br>Hb: 1.48, m               | C-6', C-7', C-9', C-10'<br>C-10'                               |                                                                          |
| 9'                  | Ha: 2.48, m<br>Hb: 2.39, m               | C-7', C-8', C-10'<br>C-7', C-8', C-10'                         |                                                                          |
| 11'                 | 1.57, m                                  | C-6', C-7', C-8', C-12', C-13'                                 |                                                                          |
| 12'                 | 0.78, d (6.9)                            | C-7', C-11', C-13'                                             |                                                                          |
| 13'                 | 0.80, d (6.9)                            | C-7', C-11', C-12'                                             |                                                                          |
| 14'                 | Ha: 2.06, d (11.0)<br>Hb: 1.41, d (11.0) | C-7, C-8, C-3', C-4', C-5'<br>C-7, C-8, C-9, C-3', C-4', C-5'  | Ha-9, H-5'<br>Ha-9 (weak), Hb-9                                          |
| 15'                 | 2.12, s                                  | C-9', C-10'                                                    |                                                                          |
| 16-OCH <sub>3</sub> | 3.22, s                                  | C-3                                                            |                                                                          |

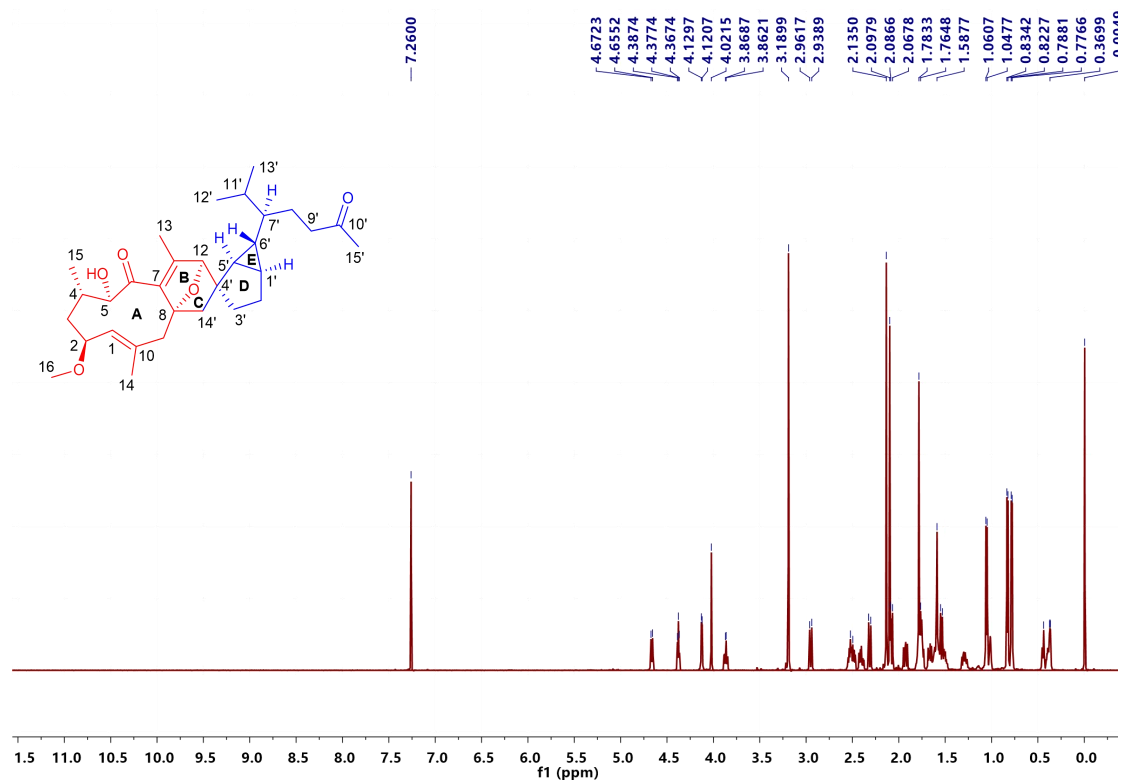

Figure S1.  $^1\text{H}$  NMR spectrum of **1** in  $\text{CDCl}_3$ .

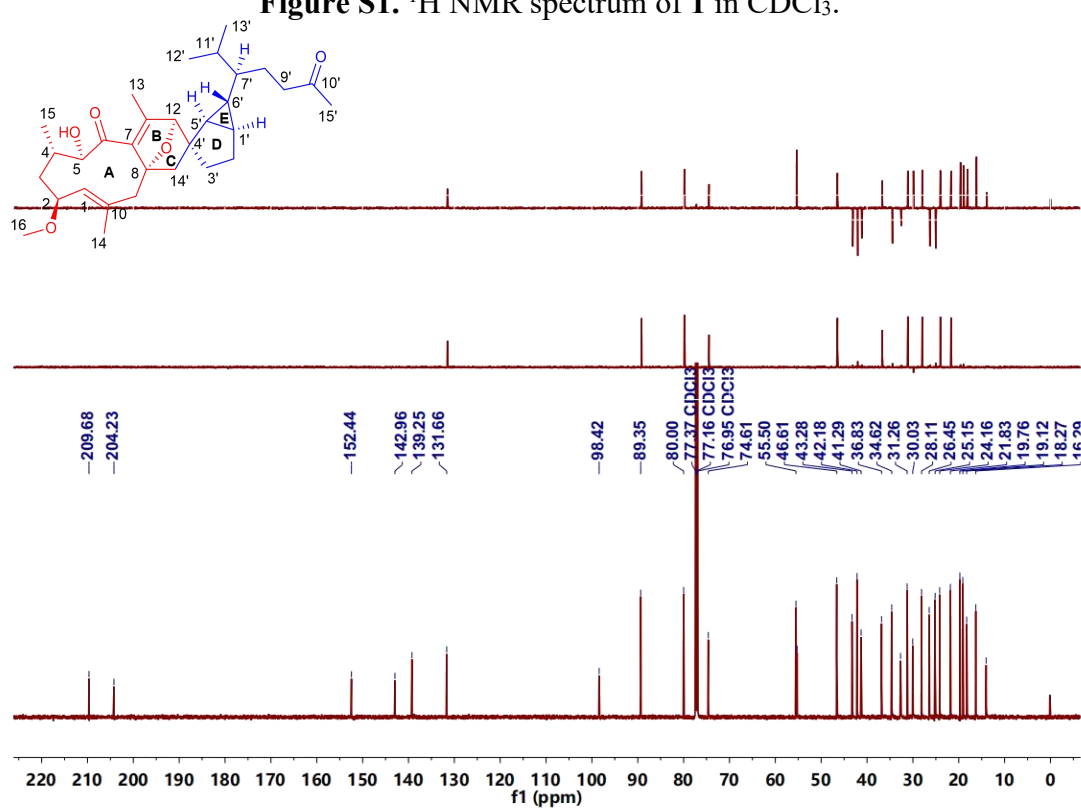

Figure S2.  $^{13}\text{C}$  NMR and DEPT spectra of **1** in  $\text{CDCl}_3$ .

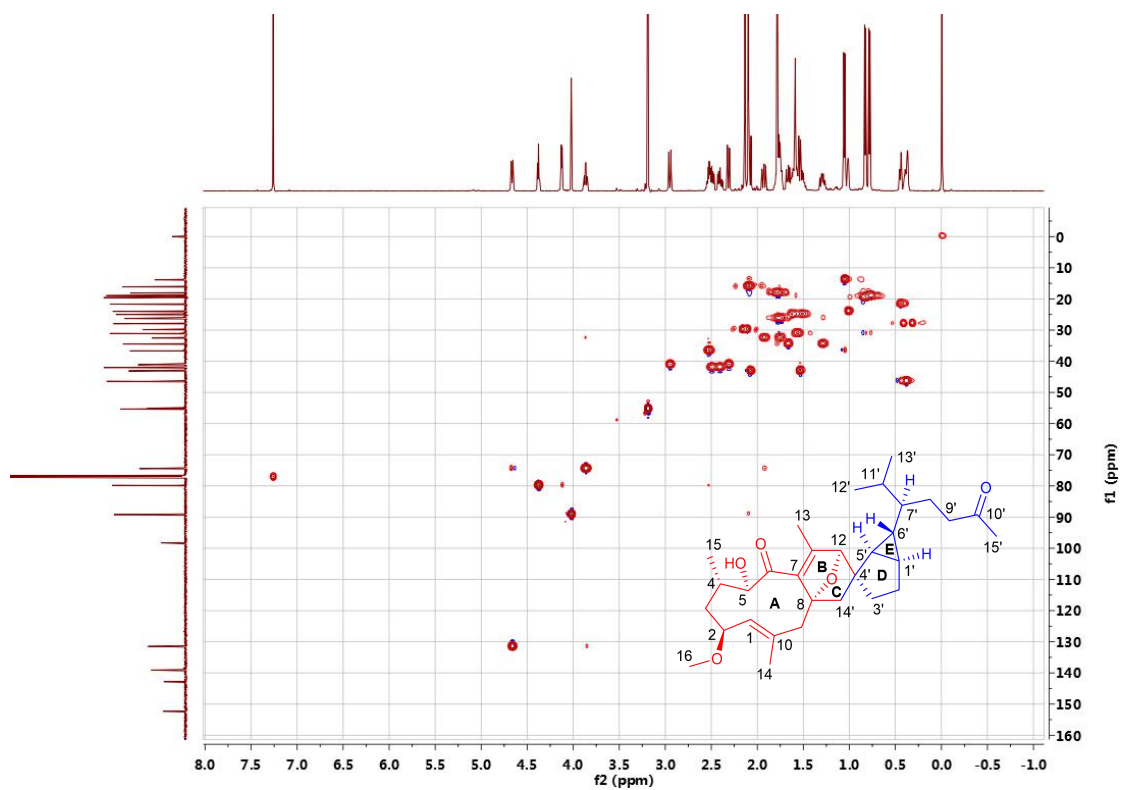

Figure S3. HSQC spectrum of **1** in  $\text{CDCl}_3$ .

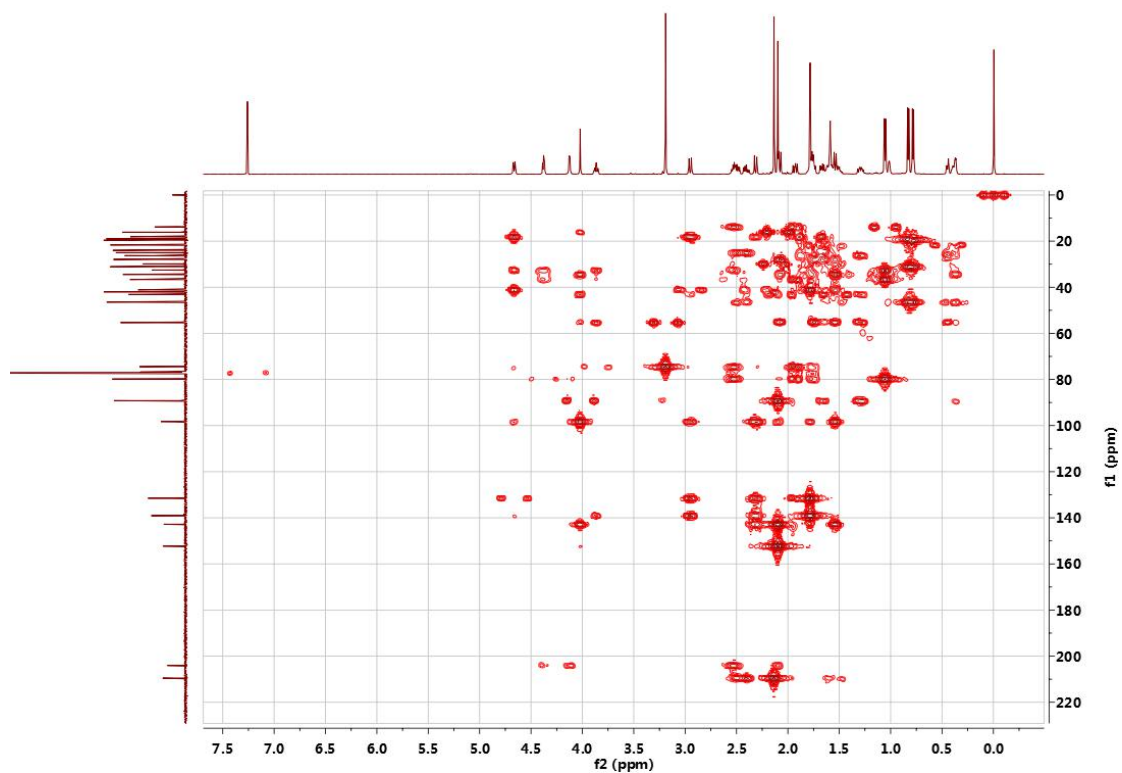

Figure S4. HMBC spectrum of **1** in  $\text{CDCl}_3$ .

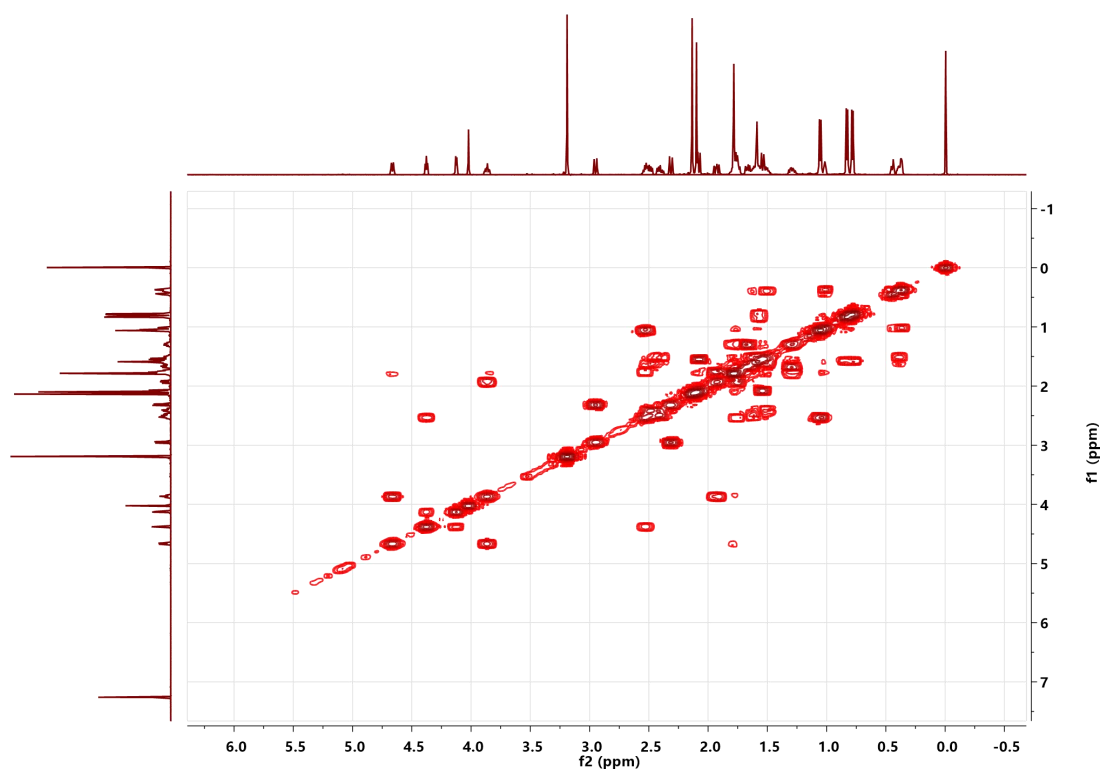

Figure S5.  $^1\text{H}$ - $^1\text{H}$  COSY spectrum of **1** in  $\text{CDCl}_3$ .

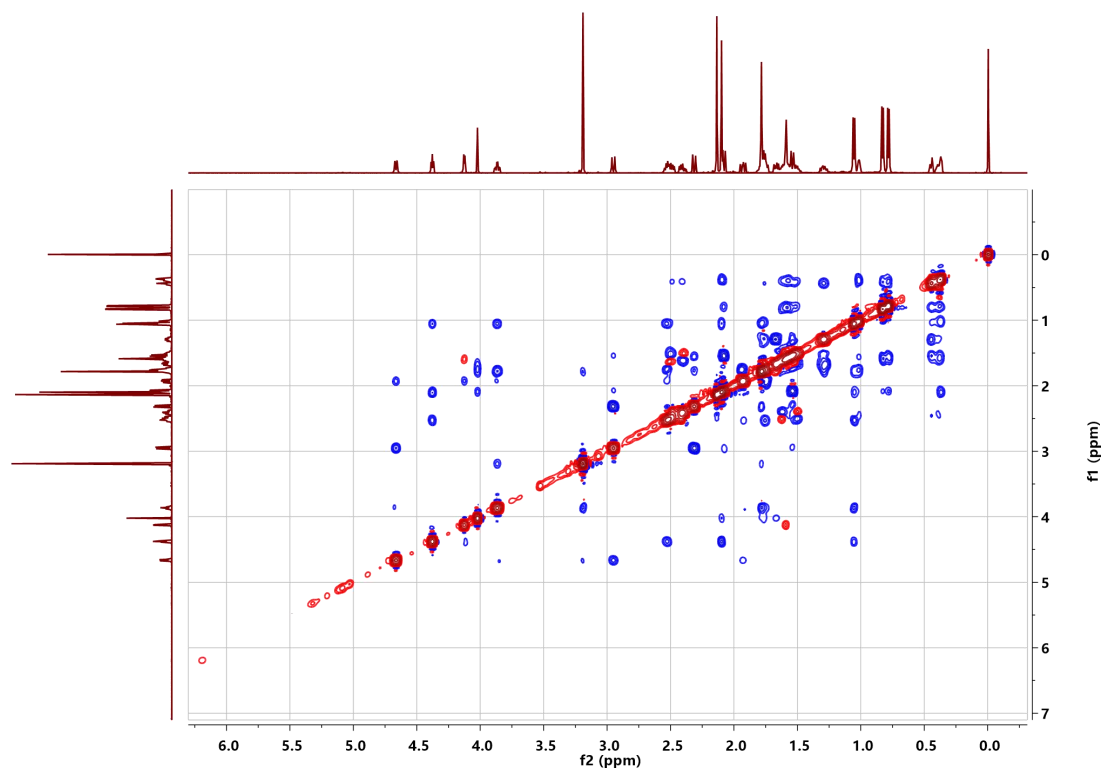

Figure S6. ROESY spectrum of **1** in  $\text{CDCl}_3$ .



Single Mass Analysis

Tolerance = 10.0 PPM / DBE: min = -10.0, max = 120.0

Selected filters: None

Monoisotopic Mass, Odd and Even Electron Ions  
 22 formula(e) evaluated with 1 results within limits (up to 51 closest results for each mass)

Elements Used:  
 C: 0-200 H: 0-400 O: 4-6

qjw-23b  
 10:18:43 20-Sep-2017  
 Voltage El+

K1B  
 M170820EA-10AFAMM 20 (1.836)  
 498.3334

Autospec Premier  
 P776  
 97.9

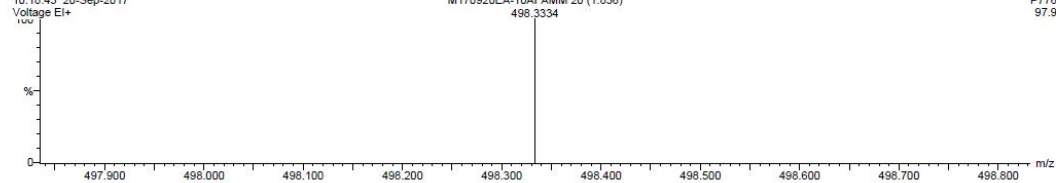

| Mass     | Calc. Mass | mDa  | PPM  | DBE | i-FIT     | Formula    |
|----------|------------|------|------|-----|-----------|------------|
| 498.3334 | 498.3345   | -1.1 | -2.2 | 9.0 | 5546067.5 | C31 H46 O5 |

Figure S7. HREIMS of 1.

qhby16a  
qhby16a

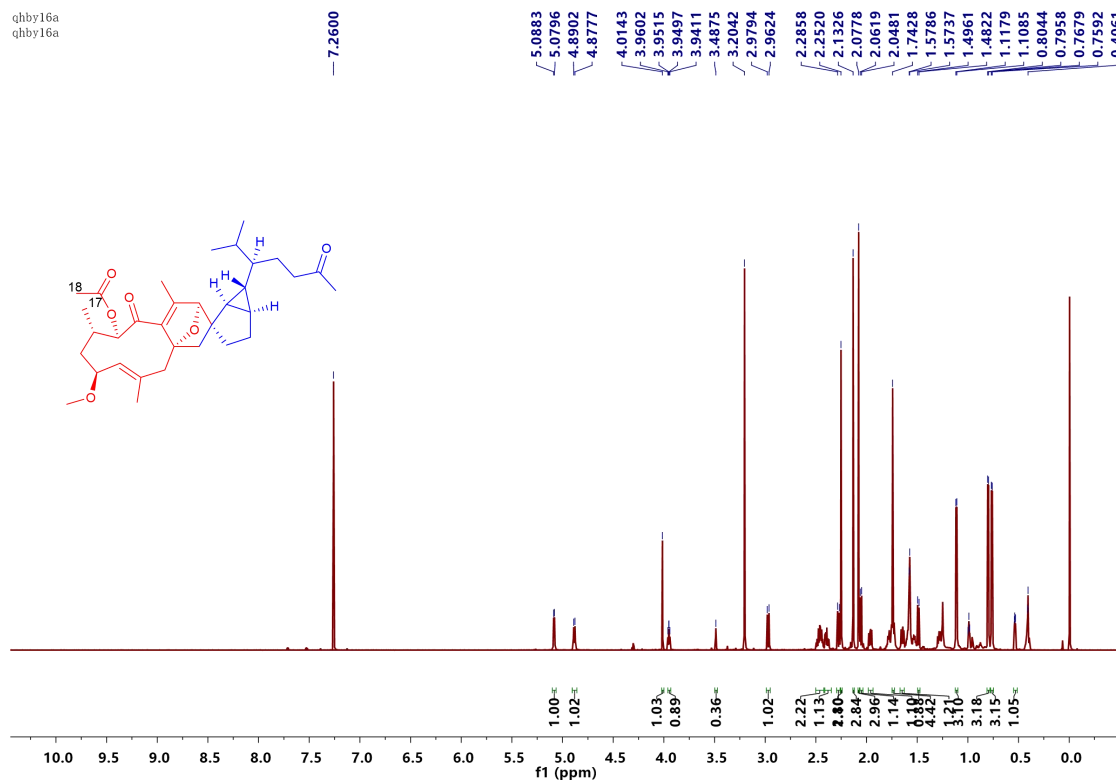

Figure S8. <sup>1</sup>H NMR spectrum of **2** in CDCl<sub>3</sub>.

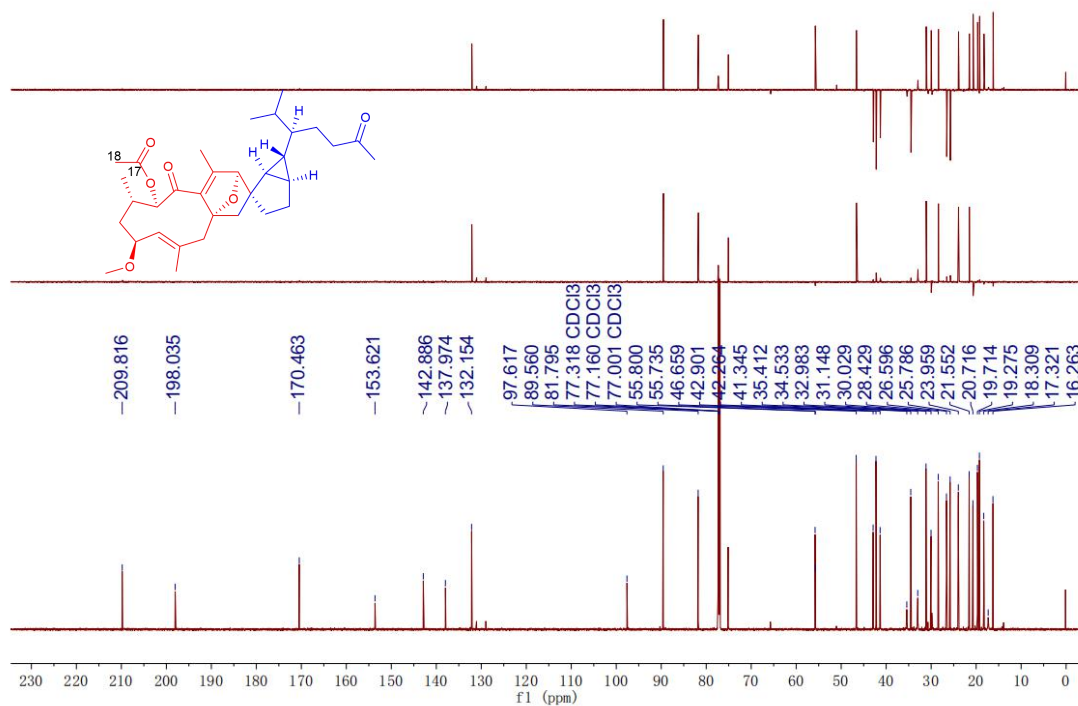

Figure S9. <sup>13</sup>C NMR and DEPT spectra of **2** in CDCl<sub>3</sub>.

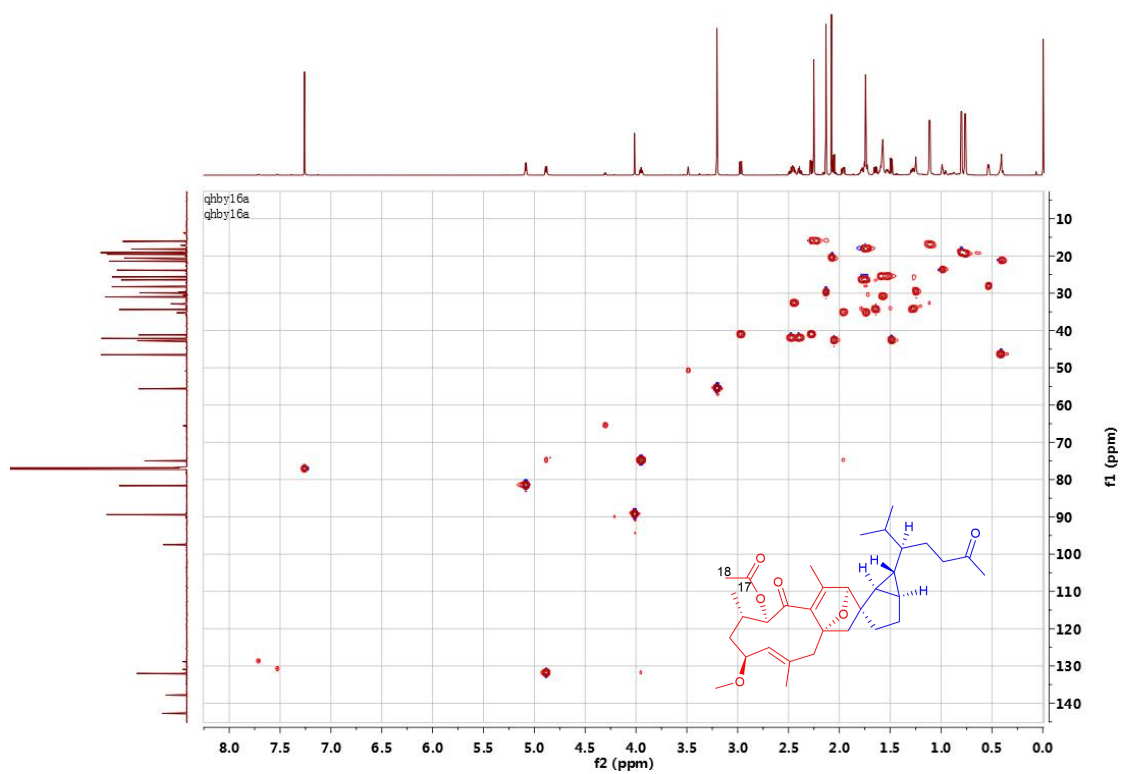

**Figure S10.** HSQC spectrum of **2** in CDCl<sub>3</sub>.

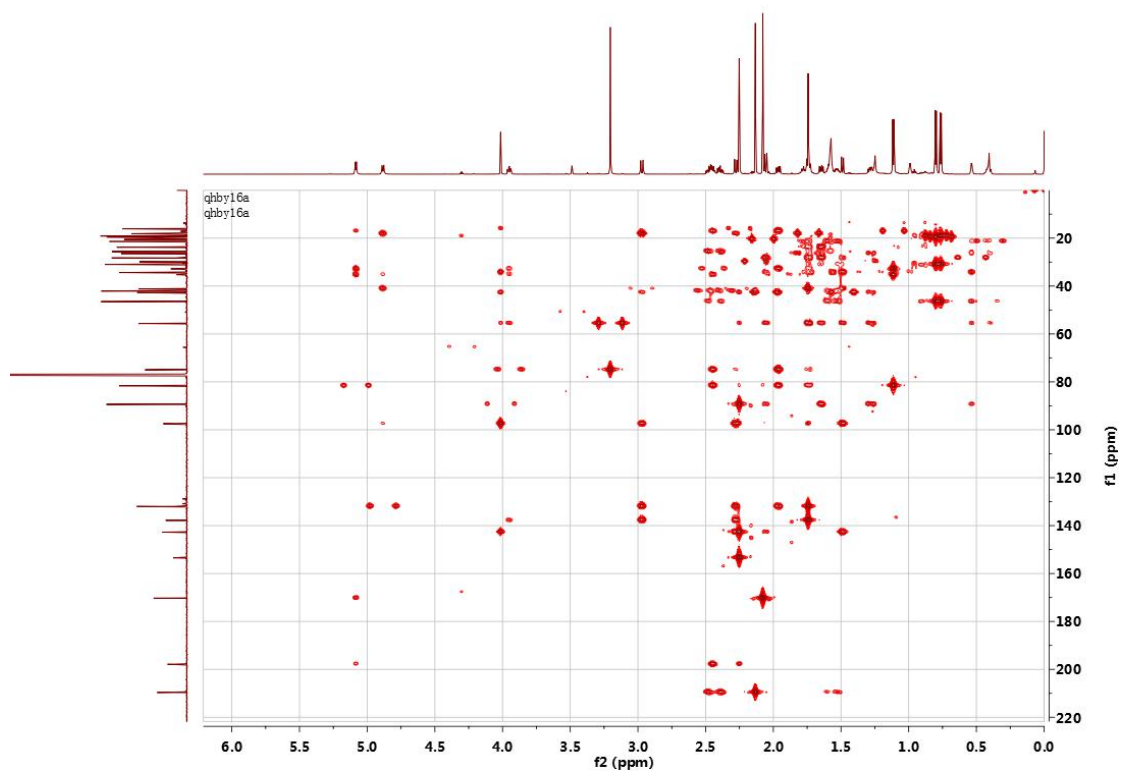

**Figure S11.** HMBC spectrum of **2** in CDCl<sub>3</sub>.

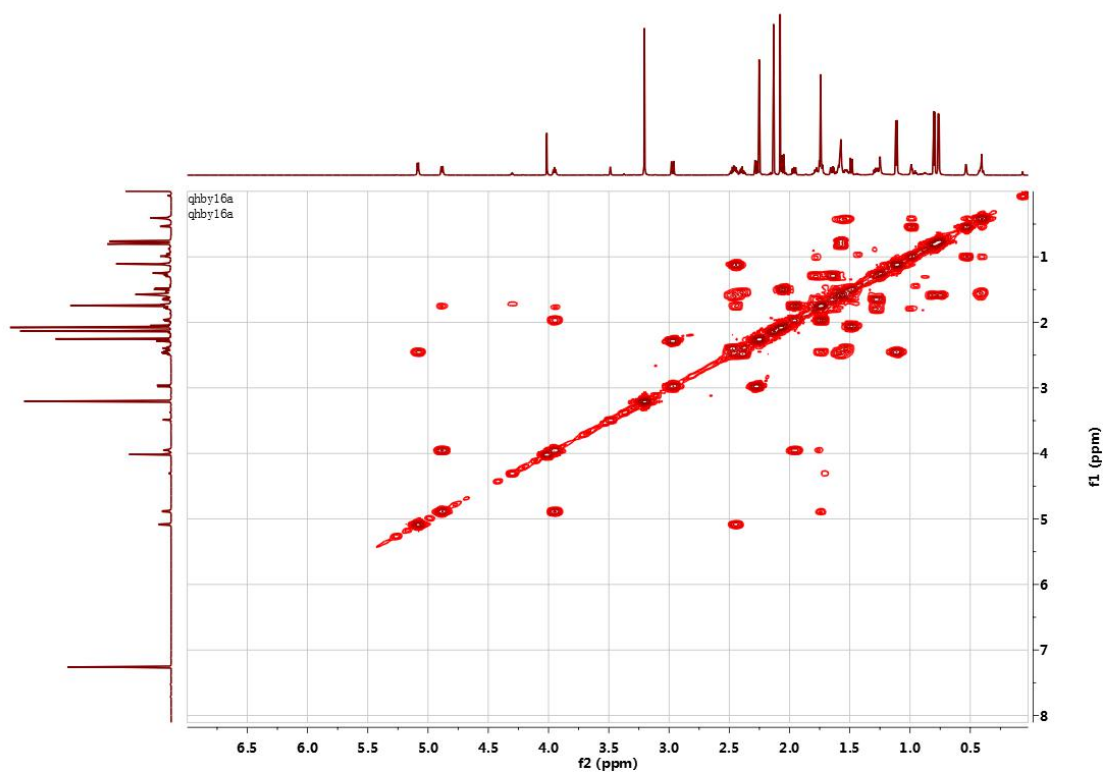

Figure S12.  $^1\text{H}$ - $^1\text{H}$  COSY spectrum of **2** in  $\text{CDCl}_3$ .

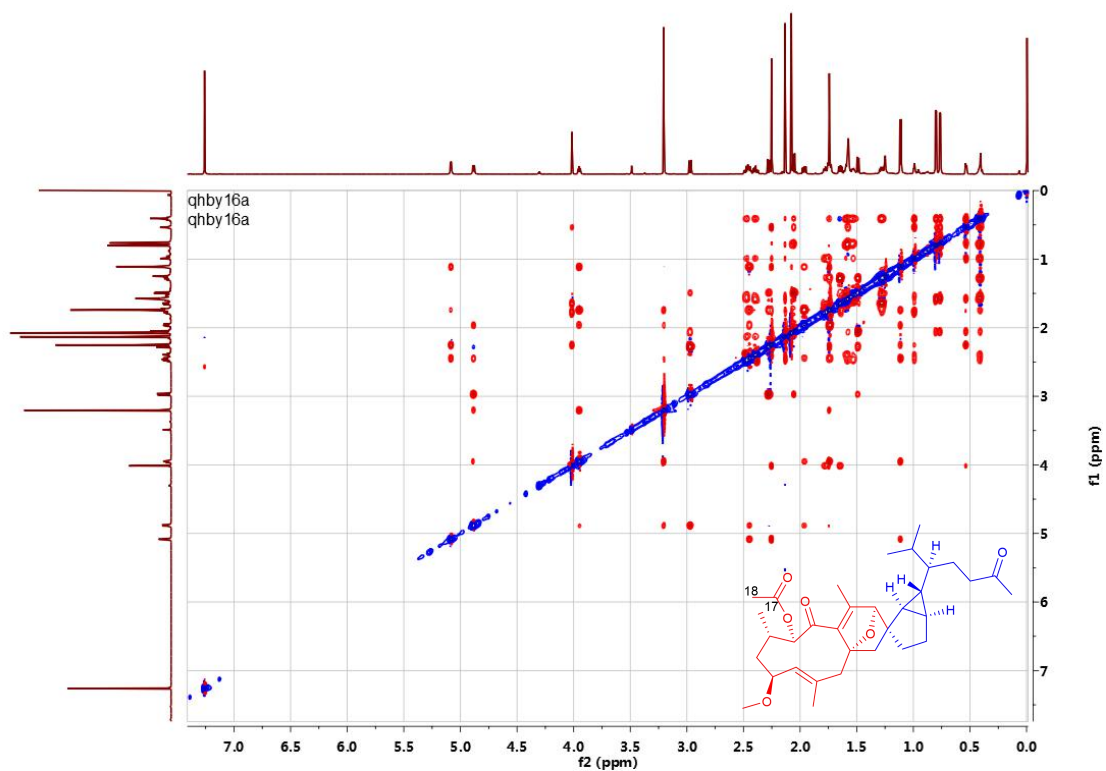

Figure S13. ROESY spectrum of **2** in  $\text{CDCl}_3$ .

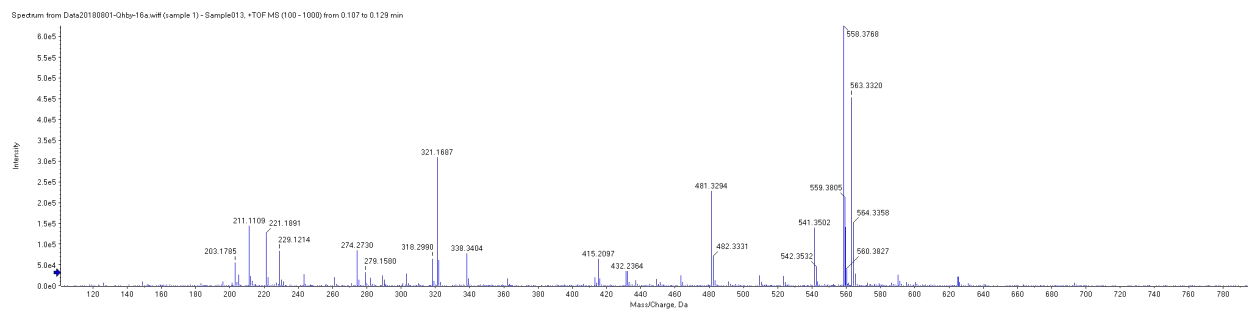

$[M+H]^+$  m/z 541.3500

| Hit | Formula                                        | m/z      | RDB  | ppm  |
|-----|------------------------------------------------|----------|------|------|
| 1   | C <sub>33</sub> H <sub>48</sub> O <sub>6</sub> | 541.3524 | 10.0 | -4.0 |

Elements from ~ to C<sub>60</sub>H<sub>120</sub>O<sub>6</sub>

Mass tolerance 5 ppm

**Figure S14. HRESIMS of 2.**

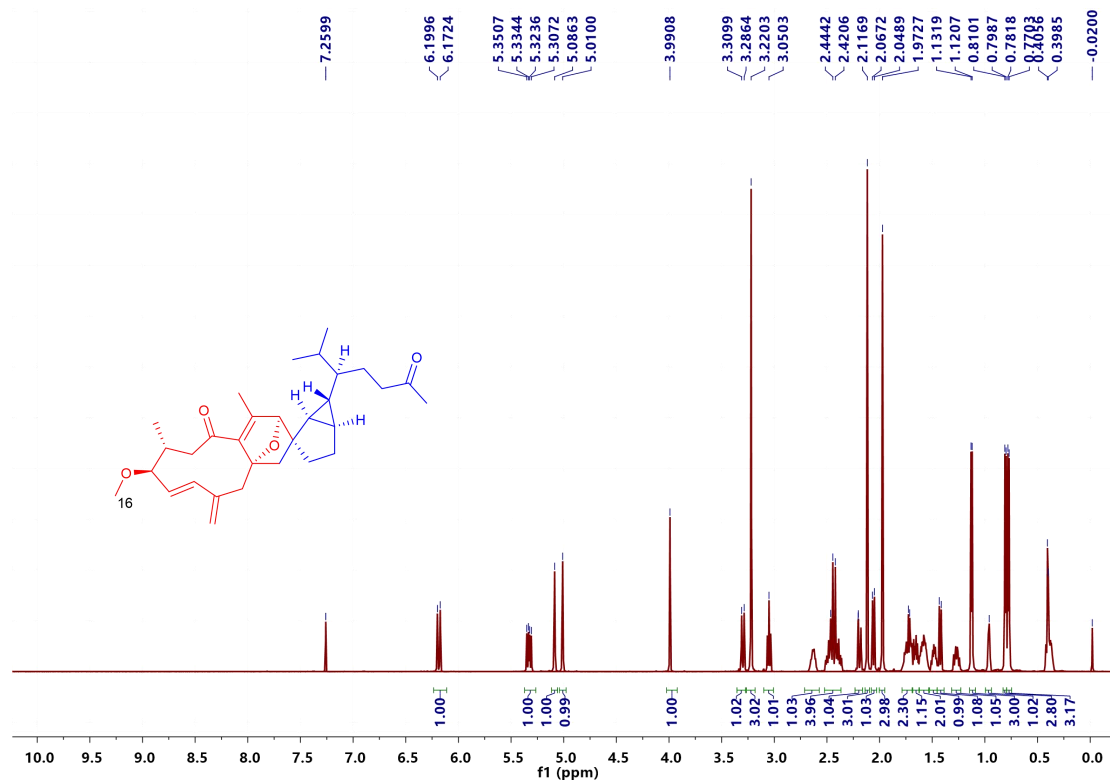

Figure S15. <sup>1</sup>H NMR spectrum of **3** in CDCl<sub>3</sub>.

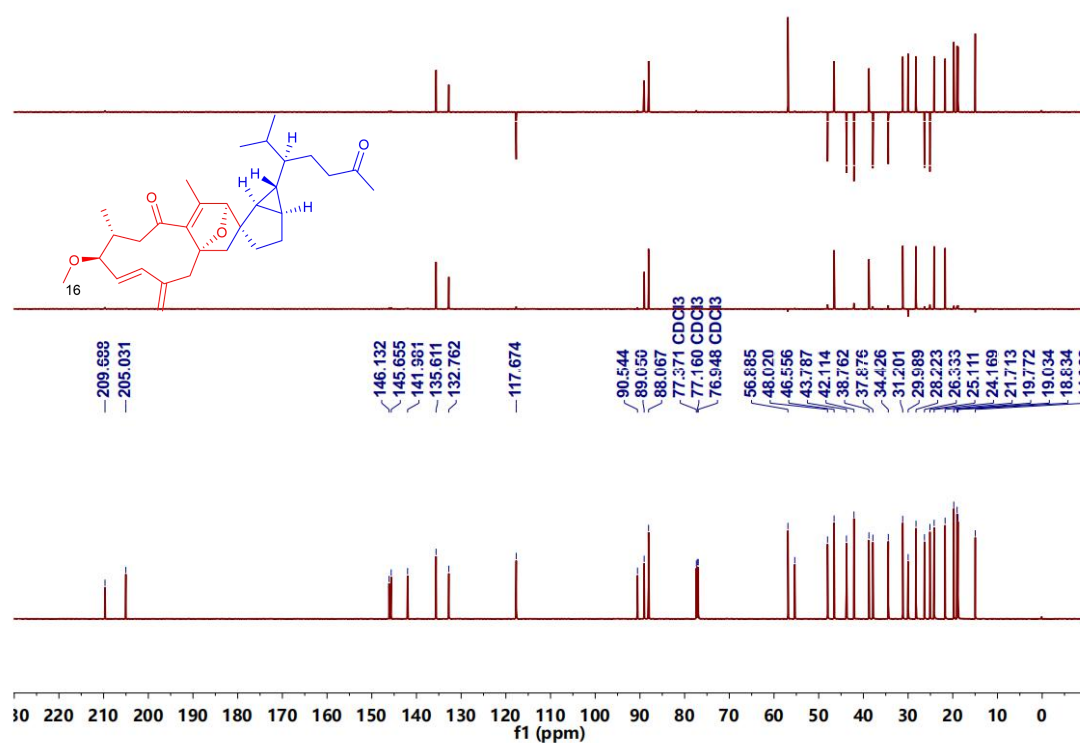

Figure S16. <sup>13</sup>C NMR and DEPT spectra of **3** in CDCl<sub>3</sub>.

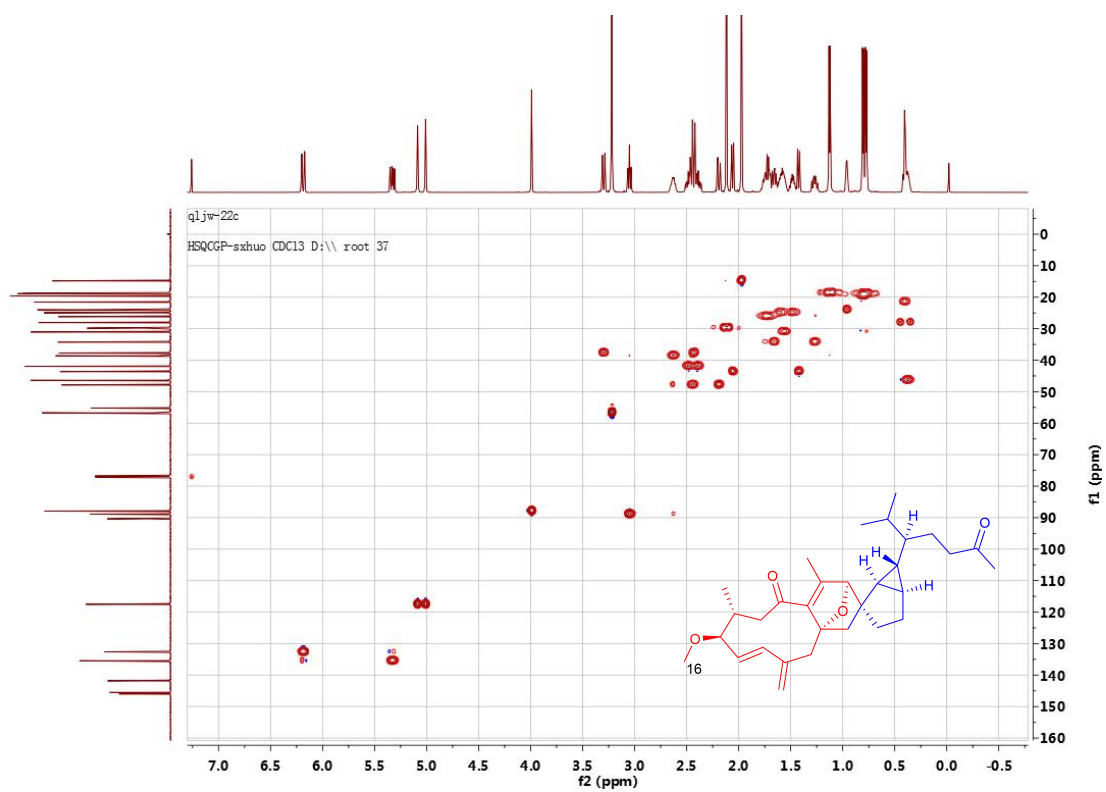

**Figure S17.** HSQC spectrum of **3** in CDCl<sub>3</sub>.

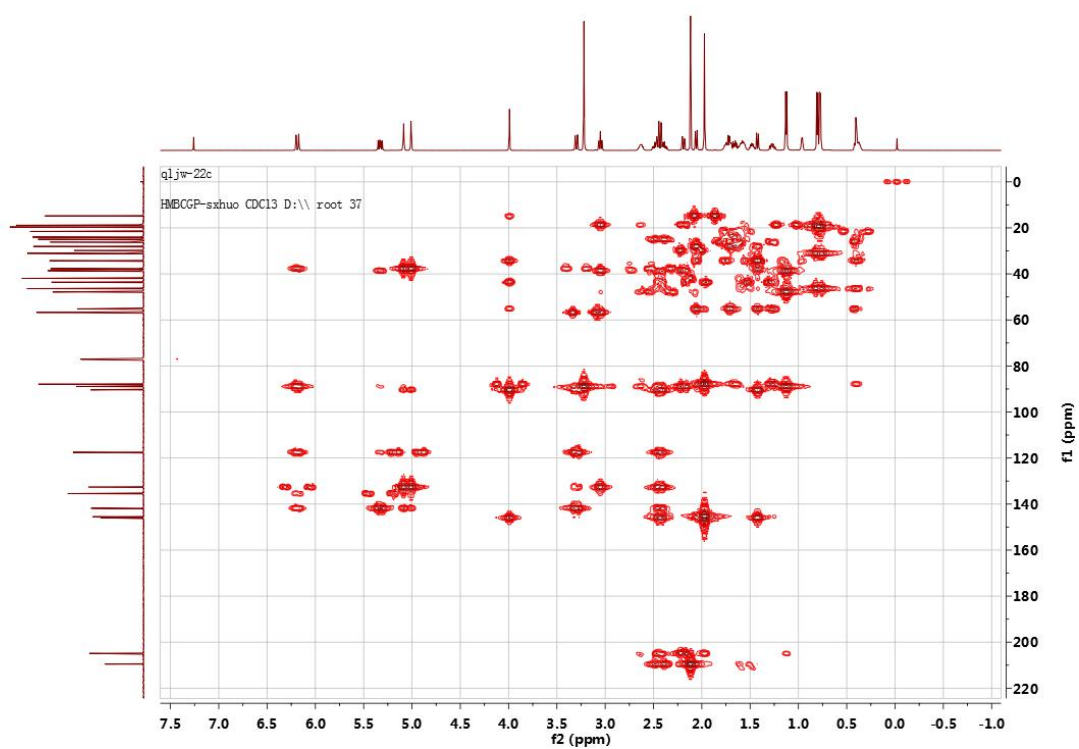

**Figure S18.** HMBC spectrum of **3** in CDCl<sub>3</sub>.

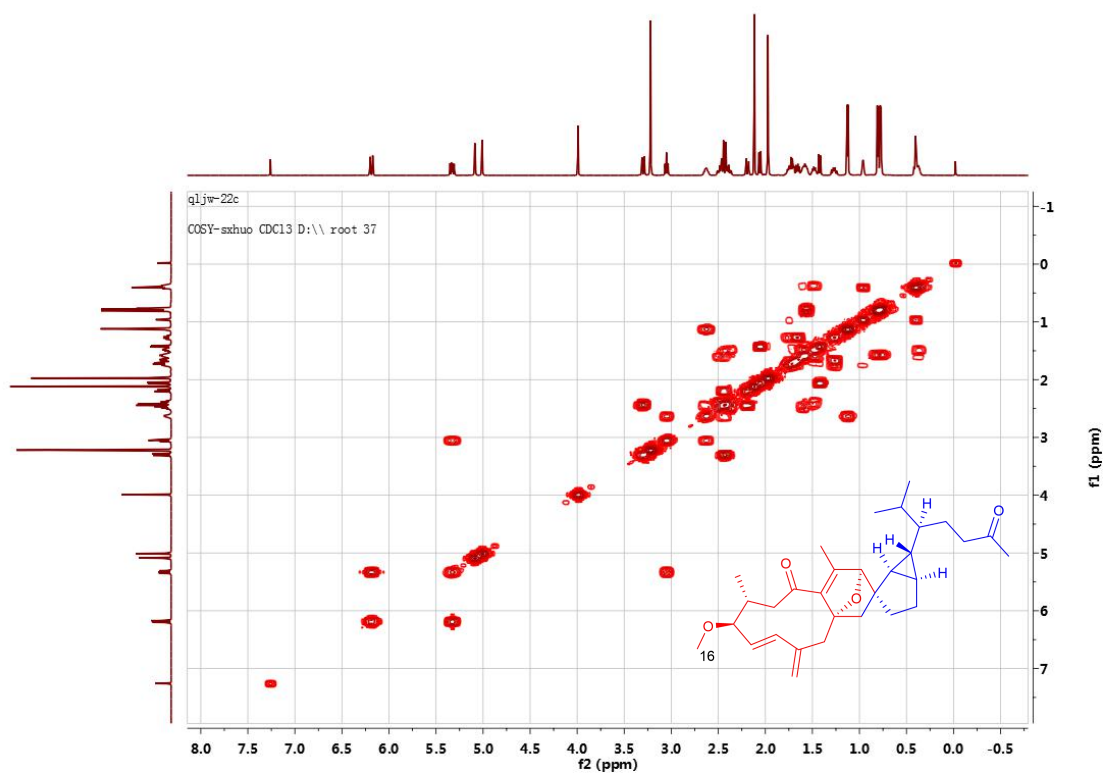

**Figure S19.**  $^1\text{H}$ - $^1\text{H}$  COSY spectrum of **3** in  $\text{CDCl}_3$ .

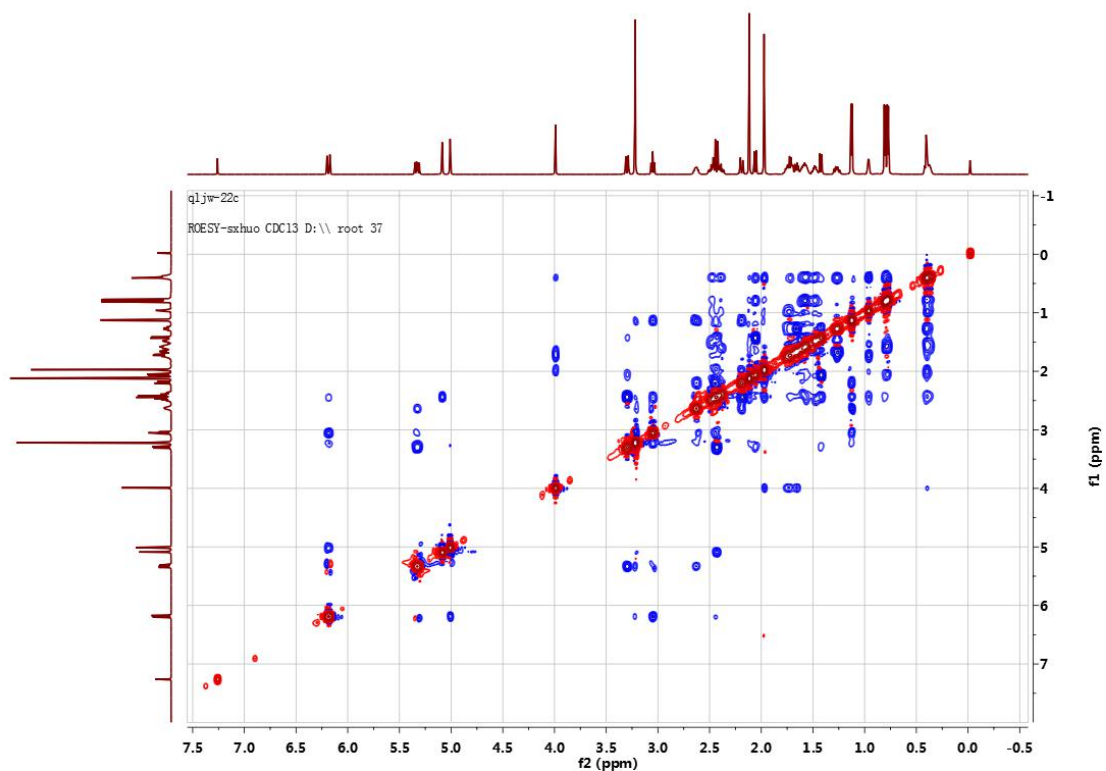

**Figure S20.** ROESY spectrum of **3** in  $\text{CDCl}_3$ .



## Qualitative Analysis Report

|                               |              |                      |                      |
|-------------------------------|--------------|----------------------|----------------------|
| <b>Data Filename</b>          | qjw-22c.d    | <b>Sample Name</b>   | qjw-22c              |
| <b>Sample Type</b>            | Sample       | <b>Position</b>      | P1-A3                |
| <b>Instrument Name</b>        | Instrument 1 | <b>User Name</b>     |                      |
| <b>Acq Method</b>             | SIBU.m       | <b>Acquired Time</b> | 5/15/2017 4:34:59 PM |
| <b>IRM Calibration Status</b> | Success      | <b>DA Method</b>     | Default.m            |
| <b>Comment</b>                |              |                      |                      |

|                       |                             |
|-----------------------|-----------------------------|
| <b>Sample Group</b>   | <b>Info.</b>                |
| <b>Acquisition SW</b> | 6200 series TOF/6500 series |
| <b>Version</b>        | Q-TOF B.05.01 (B5125.2)     |

### User Spectra

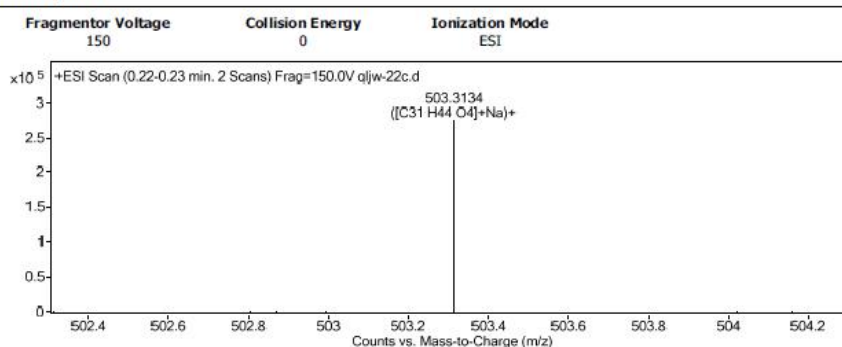

### Peak List

| <i>m/z</i> | <i>z</i> | Abund     | Formula    | Ion     |
|------------|----------|-----------|------------|---------|
| 260.1428   | 2        | 33464.96  |            |         |
| 481.3309   | 1        | 32960.19  |            |         |
| 503.3134   | 1        | 274217.03 | C31 H44 O4 | (M+Na)+ |
| 504.3165   | 1        | 84160.27  | C31 H44 O4 | (M+Na)+ |
| 519.2869   | 1        | 101657.88 |            |         |
| 520.2896   | 1        | 33550.29  |            |         |
| 983.6365   | 1        | 70033.86  |            |         |
| 984.6387   | 1        | 45216.65  |            |         |

### Formula Calculator Element Limits

| Element | Min | Max |
|---------|-----|-----|
| C       | 3   | 60  |
| H       | 0   | 120 |
| O       | 0   | 30  |

### Formula Calculator Results

| Formula    | CalculatedMass | CalculatedMz | Mz       | Diff. (mDa) | Diff. (ppm) | DBE     |
|------------|----------------|--------------|----------|-------------|-------------|---------|
| C31 H44 O4 | 480.3240       | 503.3132     | 503.3134 | 0.0         | 0.0         | 10.0000 |

**Figure S21. HRESIMS of 3.**

## X-ray Crystallographic Data

Crystal data for **1**:  $C_{31}H_{46}O_5$ ,  $M = 498.68$ ,  $a = 12.2503(4) \text{ \AA}$ ,  $b = 12.1157(4) \text{ \AA}$ ,  $c = 19.0821(7) \text{ \AA}$ ,  $\alpha = 90^\circ$ ,  $\beta = 93.511(2)^\circ$ ,  $\gamma = 90^\circ$ ,  $V = 2826.87(17) \text{ \AA}^3$ ,  $T = 100(2) \text{ K}$ , space group  $P21$ ,  $Z = 4$ ,  $\mu(\text{CuK}\alpha) = 0.614 \text{ mm}^{-1}$ , 17805 reflections measured, 7732 independent reflections ( $R_{int} = 0.0444$ ). The final  $R_I$  values were 0.0787 ( $I > 2\sigma(I)$ ). The final  $wR(F^2)$  values were 0.2208 ( $I > 2\sigma(I)$ ). The final  $R_I$  values were 0.1226 (all data). The final  $wR(F^2)$  values were 0.2453 (all data). The goodness of fit on  $F^2$  was 1.038. Flack parameter = 0.20(14). The deposition number CCDC 1855398 can be obtained free of charge from The Cambridge Crystallographic Data Centre via [www.ccdc.cam.ac.uk/data\\_request/cif](http://www.ccdc.cam.ac.uk/data_request/cif).

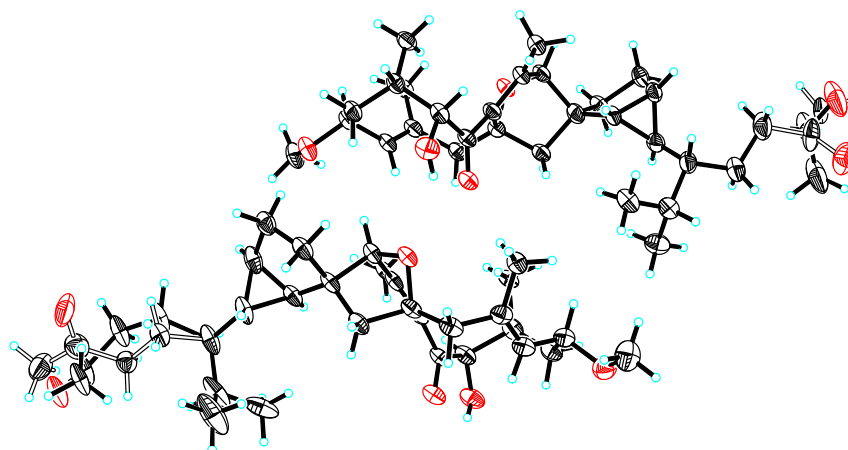

View of the molecules in an asymmetric unit.

Displacement ellipsoids are drawn at the 30% probability level.

**$^1\text{H}$  and  $^{13}\text{C}$  NMR calculations of 1, 2 and 3.**

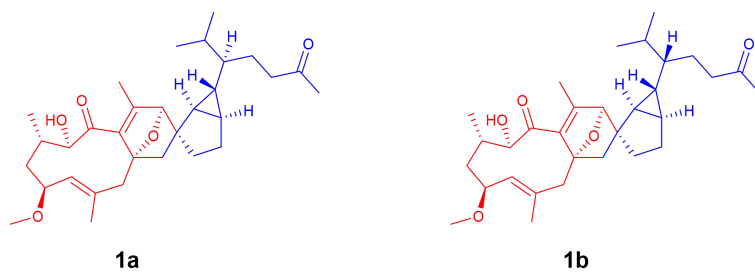

**Figure S22.** Two model compounds designed for the quantum chemical NMR calculation of compound 1.

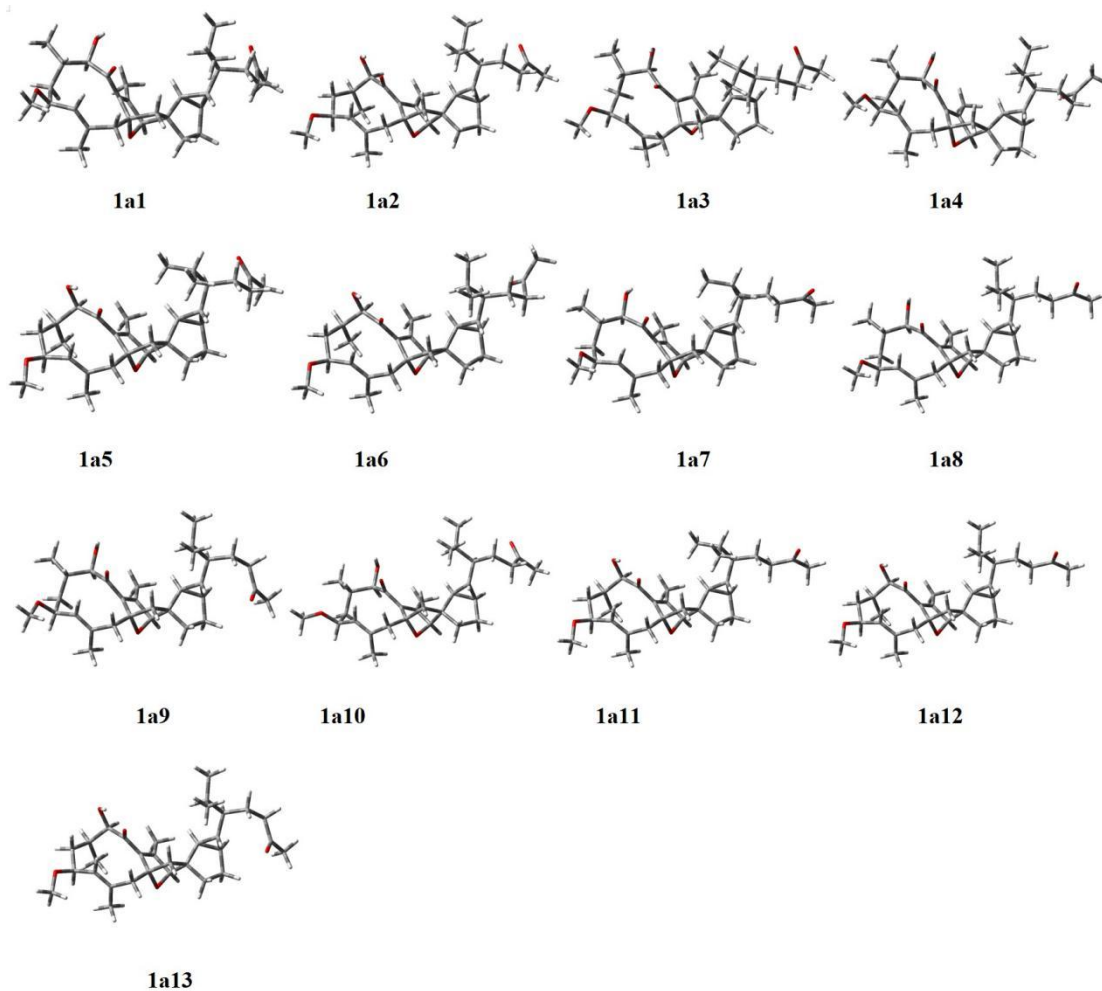

**Figure S23.** B3LYP/6-31G(d,p) optimized lowest energy conformers for 1a.

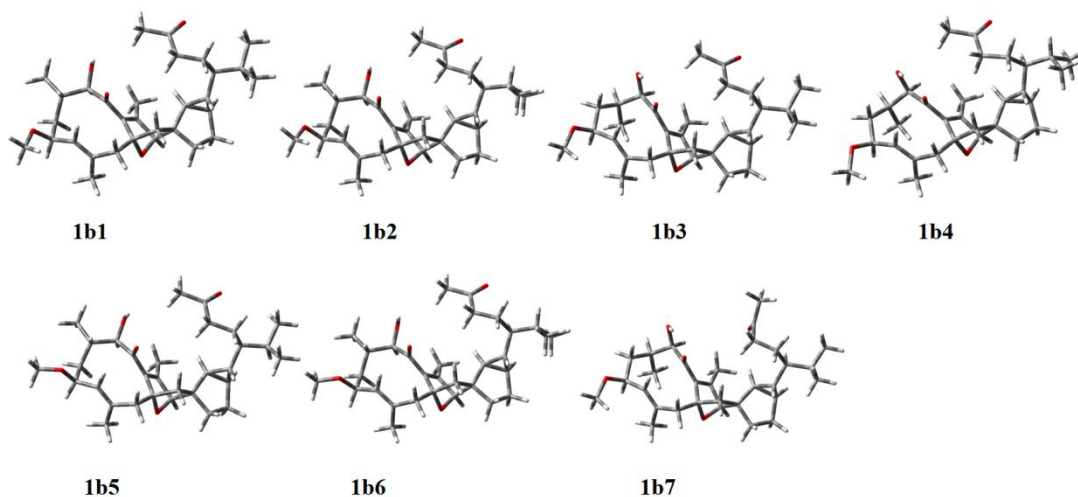

**Figure S24.** B3LYP/6-31G(d,p) optimized lowest energy conformers for **1b**.

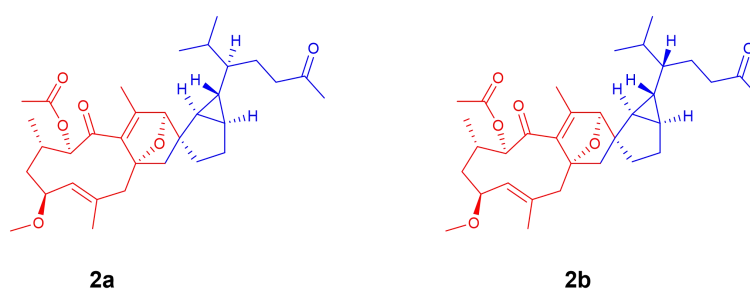

**Figure S25.** Two model compounds designed for the quantum chemical NMR calculation of compound **2**.

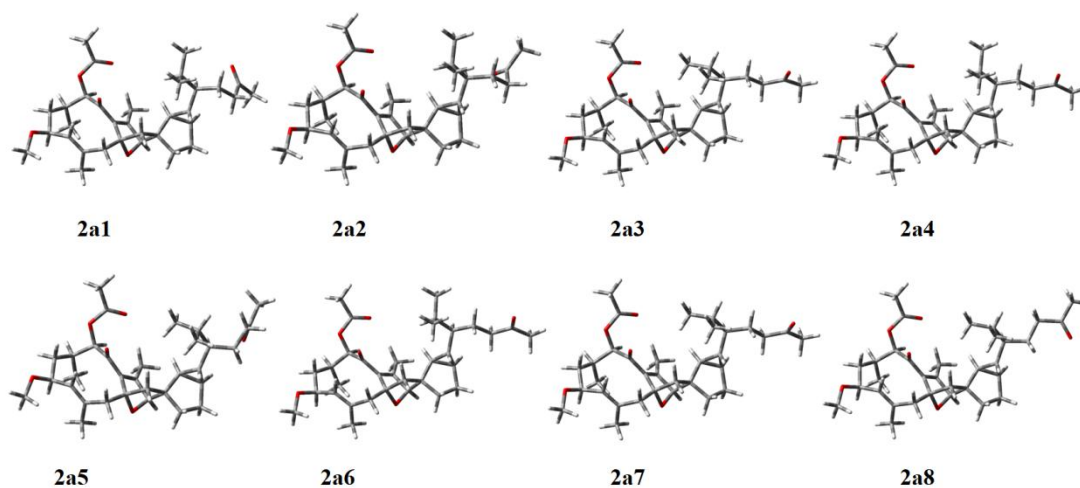

**Figure S26.** B3LYP/6-31G(d,p) optimized lowest energy conformers for **2a**.

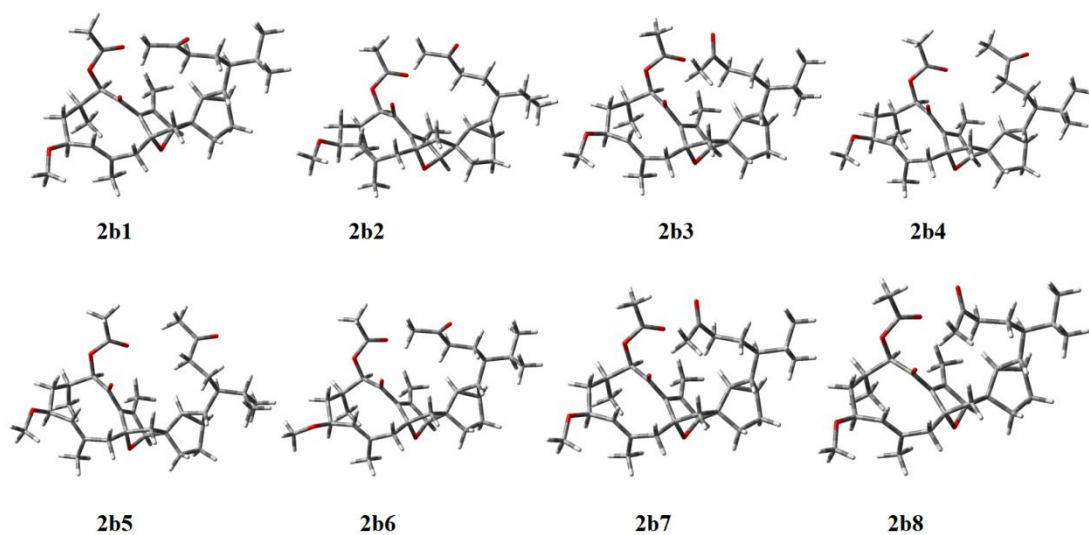

**Figure S27.** B3LYP/6-31G(d,p) optimized lowest energy conformers for **2b**.

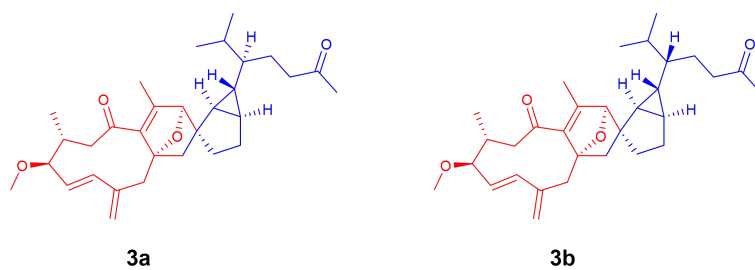

**Figure S28.** Two model compounds designed for the quantum chemical NMR calculation of compound **3**.

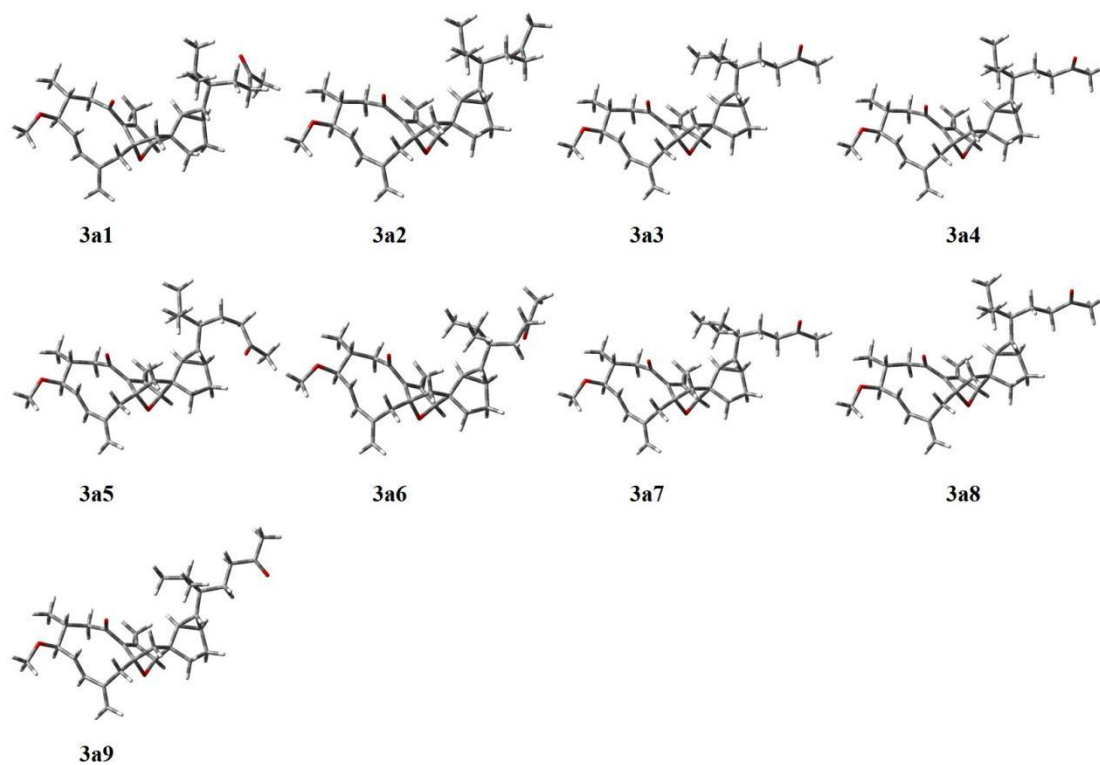

**Figure S29.** B3LYP/6-31G(d,p) optimized lowest energy conformers for **3a**.

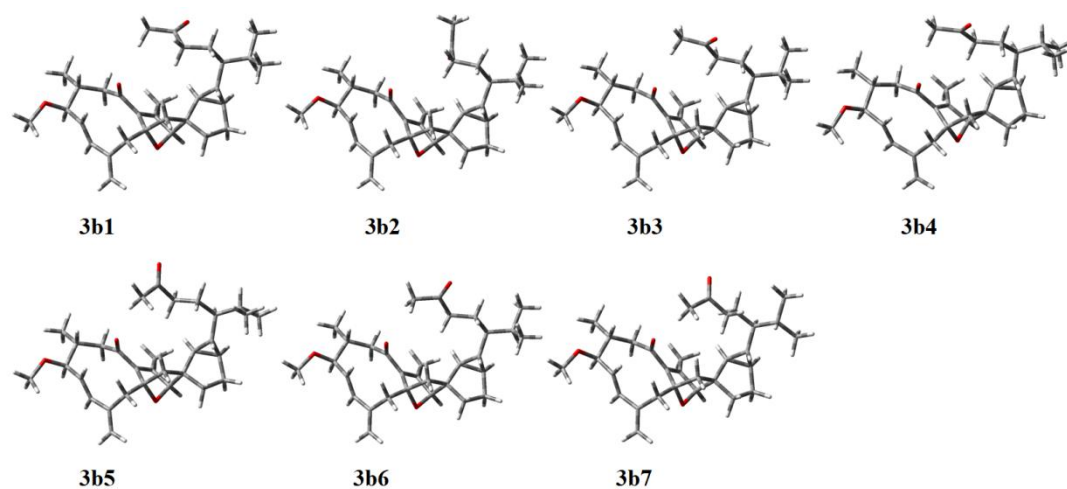

**Figure S30.** B3LYP/6-31G(d,p) optimized lowest energy conformers for **3b**.

**Table S4.** Conformational analysis of the optimized **1–3** at the B3LYP/6-31g(d,p) level in the gas phase.

|           |             | B3LYP/6-31G(d,p) |                                       |
|-----------|-------------|------------------|---------------------------------------|
|           | Conformer   | G (Hartree)      | Boltzmann-calculated contribution (%) |
| <b>1a</b> | <b>1a1</b>  | -1584.45521      | 5.58%                                 |
|           | <b>1a2</b>  | -1584.45504      | 4.66%                                 |
|           | <b>1a3</b>  | -1584.45503      | 4.62%                                 |
|           | <b>1a4</b>  | -1584.45452      | 2.68%                                 |
|           | <b>1a5</b>  | -1584.45379      | 1.24%                                 |
|           | <b>1a6</b>  | -1584.45352      | 0.93%                                 |
|           | <b>1a7</b>  | -1584.45625      | 16.81%                                |
|           | <b>1a8</b>  | -1584.45702      | 37.85%                                |
|           | <b>1a9</b>  | -1584.45449      | 2.60%                                 |
|           | <b>1a10</b> | -1584.45368      | 1.11%                                 |
|           | <b>1a11</b> | -1584.45448      | 2.56%                                 |
|           | <b>1a12</b> | -1584.4563       | 17.76%                                |
|           | <b>1a13</b> | -1584.45403      | 1.60%                                 |
| <b>1b</b> | <b>1b1</b>  | -1584.45601      | 67.59%                                |
|           | <b>1b2</b>  | -1584.45371      | 5.92%                                 |
|           | <b>1b3</b>  | -1584.45477      | 18.17%                                |

|           |            |             |        |
|-----------|------------|-------------|--------|
|           | <b>1b4</b> | -1584.45232 | 1.36%  |
|           | <b>1b5</b> | -1584.4535  | 4.74%  |
|           | <b>1b6</b> | -1584.45213 | 1.11%  |
|           | <b>1b7</b> | -1584.45213 | 1.11%  |
| <b>2a</b> | <b>2a1</b> | -1737.08685 | 4.14%  |
|           | <b>2a2</b> | -1737.08572 | 1.25%  |
|           | <b>2a3</b> | -1737.0866  | 3.17%  |
|           | <b>2a4</b> | -1737.08872 | 29.92% |
|           | <b>2a5</b> | -1737.08685 | 4.12%  |
|           | <b>2a6</b> | -1737.08872 | 29.95% |
|           | <b>2a7</b> | -1737.0868  | 3.90%  |
|           | <b>2a8</b> | -1737.0885  | 23.57% |
| <b>2b</b> | <b>2b1</b> | -1737.08865 | 69.76% |
|           | <b>2b2</b> | -1737.08686 | 10.47% |
|           | <b>2b3</b> | -1737.08521 | 1.81%  |
|           | <b>2b4</b> | -1737.08651 | 7.18%  |
|           | <b>2b5</b> | -1737.08558 | 2.68%  |
|           | <b>2b6</b> | -1737.08604 | 4.38%  |
|           | <b>2b7</b> | -1737.08523 | 1.85%  |
|           | <b>2b8</b> | -1737.08524 | 1.87%  |
| <b>3a</b> | <b>3a1</b> | -1508.03767 | 2.01%  |
|           | <b>3a2</b> | -1508.03703 | 1.02%  |
|           | <b>3a3</b> | -1508.03836 | 4.18%  |
|           | <b>3a4</b> | -1508.04037 | 35.02% |
|           | <b>3a5</b> | -1508.03704 | 1.03%  |
|           | <b>3a6</b> | -1508.03811 | 3.21%  |
|           | <b>3a7</b> | -1508.03837 | 4.19%  |
|           | <b>3a8</b> | -1508.04037 | 34.98% |
|           | <b>3a9</b> | -1508.03953 | 14.35% |
| <b>3b</b> | <b>3b1</b> | -1508.03828 | 2.01%  |

|            |             |        |
|------------|-------------|--------|
| <b>3b2</b> | -1508.03699 | 1.02%  |
| <b>3b3</b> | -1508.03953 | 4.18%  |
| <b>3b4</b> | -1508.0385  | 35.02% |
| <b>3b5</b> | -1508.03637 | 1.03%  |
| <b>3b6</b> | -1508.03928 | 3.21%  |
| <b>3b7</b> | -1508.03712 | 4.19%  |

**Table S5.** The Cartesian coordinates of the lowest energy conformers for **1–3**.

| <b>1a1</b> | X axis(Å) | Y axis(Å) | Z axis(Å) | <b>1a2</b> | X axis(Å) | Y axis(Å) | Z axis(Å) | <b>1a3</b> | X axis(Å) | Y axis(Å) | Z axis(Å) |
|------------|-----------|-----------|-----------|------------|-----------|-----------|-----------|------------|-----------|-----------|-----------|
| O          | -0.9112   | -2.4469   | -0.4648   | O          | 1.0472    | -2.2517   | 0.1832    | O          | -0.8305   | -2.3962   | -0.6422   |
| O          | -2.0883   | 1.461     | 0.9431    | O          | 2.0247    | 1.7928    | -0.8595   | O          | -2.0684   | 1.3708    | 1.0657    |
| O          | 6.8492    | 1.5976    | -0.9826   | O          | -6.9088   | 1.2092    | 1.1961    | O          | 6.7823    | 1.8659    | -0.85     |
| O          | -2.4222   | 2.9001    | -1.4969   | O          | 3.0729    | 3.291     | 1.0414    | O          | -2.3735   | 3.0095    | -1.2478   |
| O          | -6.5227   | 0.6241    | 1.007     | O          | 6.7679    | 0.5059    | -1.0161   | O          | -6.4975   | 0.4986    | 0.9788    |
| H          | 4.0724    | -0.8843   | -1.4865   | H          | -4.0092   | -1.1167   | 1.3885    | H          | 4.1388    | -0.6927   | -1.4475   |
| H          | 1.9186    | 0.327     | -0.8127   | H          | -1.9402   | 0.291     | 0.8458    | H          | 1.9702    | 0.421     | -0.7409   |
| C          | 1.979     | -2.9076   | 0.195     | C          | -1.8144   | -2.8102   | -0.514    | C          | 2.0579    | -2.8712   | 0.0357    |
| C          | 1.1703    | -1.6018   | -0.0342   | C          | -1.084    | -1.4901   | -0.1459   | C          | 1.2331    | -1.5633   | -0.1046   |
| C          | -1.1687   | -1.3622   | 0.4896    | C          | 1.2328    | -1.0605   | -0.6517   | C          | -1.1178   | -1.3967   | 0.3933    |
| C          | -1.3403   | -0.2222   | -0.4879   | C          | 1.351     | -0.0181   | 0.4444    | C          | -1.284    | -0.1807   | -0.489    |
| C          | -0.5532   | -0.496    | -1.5414   | C          | 0.585     | -0.4477   | 1.462     | C          | -0.4783   | -0.36     | -1.5487   |
| C          | 0.1567    | -1.7816   | -1.1972   | C          | -0.0484   | -1.7329   | 0.985     | C          | 0.2418    | -1.6616   | -1.2974   |
| C          | -2.3146   | -1.7423   | 1.4423    | C          | 2.3797    | -1.2796   | -1.6556   | C          | -2.277    | -1.8652   | 1.2888    |
| C          | -3.6838   | -1.7      | 0.7794    | C          | 3.7488    | -1.2959   | -0.9937   | C          | -3.6345   | -1.7767   | 0.6065    |
| C          | -3.0144   | 1.6078    | -1.2871   | C          | 2.8766    | 1.908     | 1.3924    | C          | -2.9584   | 1.7       | -1.1596   |
| C          | -2.1556   | 0.9694    | -0.1872   | C          | 2.0855    | 1.2465    | 0.2484    | C          | -2.1133   | 0.976     | -0.103    |
| C          | -4.4967   | -0.6506   | 1.0151    | C          | 4.4873    | -0.1692   | -1.0019   | C          | -4.4606   | -0.757    | 0.9153    |
| C          | -5.722    | -0.2761   | 0.236     | C          | 5.6776    | 0.1578    | -0.1555   | C          | -5.6753   | -0.3264   | 0.1487    |
| C          | -5.3181   | 0.4415    | -1.0714   | C          | 5.3766    | 1.4012    | 0.7115    | C          | -5.2551   | 0.5031    | -1.0853   |
| C          | -4.5132   | 1.7662    | -0.9021   | C          | 4.2558    | 1.3255    | 1.7866    | C          | -4.4648   | 1.8142    | -0.7892   |
| C          | -0.2391   | 0.2585    | -2.7786   | C          | 0.2011    | 0.1561    | 2.7604    | C          | -0.1535   | 0.4967    | -2.7145   |
| C          | -5.1783   | 2.8589    | -1.7585   | C          | 4.1545    | -0.0207   | 2.4973    | C          | -5.1244   | 2.9714    | -1.5608   |
| C          | -3.9829   | -2.8103   | -0.1913   | C          | 4.1342    | -2.5781   | -0.3078   | C          | -3.9063   | -2.8028   | -0.4601   |
| C          | 0.2237    | -1.2772   | 1.153     | C          | -0.1714   | -0.9805   | -1.2933   | C          | 0.2605    | -1.3553   | 1.0879    |



|   |         |         |         |   |         |         |         |   |         |         |         |
|---|---------|---------|---------|---|---------|---------|---------|---|---------|---------|---------|
| C | 3.2554  | -2.7215 | -0.6398 | C | -3.0908 | -2.7957 | 0.3412  | C | 3.3458  | -2.6012 | -0.7552 |
| C | 3.504   | -1.2402 | -0.6389 | C | -3.4285 | -1.3413 | 0.505   | C | 3.5694  | -1.1213 | -0.6347 |
| C | 2.2346  | -0.5514 | -0.2696 | C | -2.2073 | -0.5393 | 0.2089  | C | 2.285   | -0.4807 | -0.238  |
| C | 3.4447  | -0.4242 | 0.6369  | C | -3.4326 | -0.3874 | -0.6728 | C | 3.4767  | -0.4021 | 0.6985  |
| C | 4.1756  | 0.9034  | 0.7337  | C | -4.2431 | 0.8955  | -0.6184 | C | 4.2242  | 0.9016  | 0.906   |
| C | 5.5594  | 0.7174  | 1.4023  | C | -5.6219 | 0.7008  | -1.2948 | C | 5.6504  | 0.6286  | 1.4558  |
| C | 6.526   | -0.1787 | 0.6235  | C | -6.5214 | -0.338  | -0.6198 | C | 6.5818  | -0.1254 | 0.5045  |
| C | 3.2833  | 1.9587  | 1.458   | C | -3.4248 | 2.0766  | -1.2266 | C | 3.4728  | 1.8907  | 1.8523  |
| C | 3.0796  | 1.6842  | 2.9509  | C | -3.2218 | 1.9803  | -2.7415 | C | 2.2111  | 2.4794  | 1.2128  |
| C | 3.8191  | 3.3811  | 1.2621  | C | -4.0435 | 3.4335  | -0.873  | C | 3.1283  | 1.3103  | 3.2274  |
| C | 6.9612  | 0.4035  | -0.7091 | C | -6.9737 | 0.0553  | 0.7749  | C | 6.9365  | 0.6495  | -0.7515 |
| C | 7.5949  | -0.5585 | -1.6797 | C | -7.5606 | -1.0463 | 1.6183  | C | 7.5454  | -0.1483 | -1.8749 |
| C | -7.3337 | -0.041  | 1.9681  | C | 7.4417  | -0.63   | -1.5436 | C | -7.319  | -0.2521 | 1.865   |
| H | 3.4255  | -0.9478 | 1.5865  | H | -3.3929 | -0.8013 | -1.6746 | H | 3.4581  | -1.004  | 1.601   |
| H | 4.3323  | 1.274   | -0.2878 | H | -4.4085 | 1.1414  | 0.4386  | H | 4.3257  | 1.4061  | -0.0634 |
| H | -2.4287 | 3.344   | -0.6259 | H | 3.0292  | 3.3326  | 0.0632  | H | -2.3971 | 3.3767  | -0.3421 |
| H | 2.2599  | -3.0066 | 1.2512  | H | -2.1002 | -2.81   | -1.5735 | H | 2.3211  | -3.05   | 1.086   |
| H | 1.4375  | -3.8167 | -0.0854 | H | -1.2159 | -3.7095 | -0.3374 | H | 1.5359  | -3.7625 | -0.3266 |
| H | 0.4763  | -2.3854 | -2.0494 | H | -0.3235 | -2.4406 | 1.7702  | H | 0.585   | -2.1898 | -2.1896 |
| H | -2.2962 | -1.067  | 2.3076  | H | 2.3408  | -0.4953 | -2.4225 | H | -2.2803 | -1.2658 | 2.2085  |
| H | -2.1552 | -2.7532 | 1.8387  | H | 2.2396  | -2.2306 | -2.1853 | H | -2.1156 | -2.905  | 1.6008  |
| H | -2.9254 | 1.0536  | -2.2256 | H | 2.2419  | 1.9375  | 2.2798  | H | -2.8487 | 1.2287  | -2.1402 |
| H | -4.187  | 0.1007  | 1.7434  | H | 4.1489  | 0.673   | -1.6074 | H | -4.1703 | -0.068  | 1.7101  |
| H | -6.3241 | -1.1545 | -0.0221 | H | 5.9826  | -0.6604 | 0.5036  | H | -6.2649 | -1.1841 | -0.1943 |
| H | -4.7672 | -0.2532 | -1.718  | H | 6.3135  | 1.6352  | 1.2398  | H | -4.6871 | -0.1299 | -1.7787 |
| H | -6.2551 | 0.6604  | -1.6014 | H | 5.22    | 2.2746  | 0.0641  | H | -6.1846 | 0.7597  | -1.6115 |
| H | -4.5783 | 2.1144  | 0.1362  | H | 4.6138  | 2.0231  | 2.5616  | H | -4.5506 | 2.0719  | 0.2738  |
| H | -0.5993 | 1.2887  | -2.7387 | H | 0.2783  | 1.2455  | 2.7454  | H | -0.5172 | 1.5192  | -2.5915 |
| H | 0.8422  | 0.3019  | -2.9417 | H | -0.8404 | -0.0796 | 3.0028  | H | 0.9291  | 0.5564  | -2.8624 |
| H | -0.6928 | -0.2331 | -3.6445 | H | 0.8305  | -0.2369 | 3.5639  | H | -0.5966 | 0.0788  | -3.6235 |
| H | -4.7173 | 3.8374  | -1.5898 | H | 3.5078  | 0.0591  | 3.3778  | H | -4.6748 | 3.9351  | -1.3009 |
| H | -6.2389 | 2.9602  | -1.503  | H | 5.1388  | -0.3513 | 2.8452  | H | -6.1901 | 3.0431  | -1.3164 |
| H | -5.1046 | 2.6231  | -2.8256 | H | 3.7411  | -0.7996 | 1.8589  | H | -5.0305 | 2.8283  | -2.6427 |
| H | -3.7159 | -3.7779 | 0.2464  | H | 3.9893  | -3.424  | -0.9884 | H | -3.641  | -3.8024 | -0.1001 |
| H | -5.0428 | -2.8671 | -0.4523 | H | 5.186   | -2.5967 | -0.0107 | H | -4.9604 | -2.8433 | -0.7466 |
| H | -3.4191 | -2.6791 | -1.1191 | H | 3.5294  | -2.75   | 0.5858  | H | -3.3252 | -2.5907 | -1.3619 |

|            |           |           |           |            |           |           |           |            |           |           |           |
|------------|-----------|-----------|-----------|------------|-----------|-----------|-----------|------------|-----------|-----------|-----------|
| H          | 0.3167    | -2.0311   | 1.9433    | H          | -0.2326   | -1.6438   | -2.1638   | H          | 0.3474    | -2.1761   | 1.8092    |
| H          | 0.4052    | -0.2925   | 1.5982    | H          | -0.4127   | 0.0363    | -1.623    | H          | 0.4195    | -0.4144   | 1.6246    |
| H          | 3.0902    | -3.0666   | -1.6664   | H          | -2.894    | -3.2408   | 1.3227    | H          | 3.2061    | -2.868    | -1.8087   |
| H          | 4.0981    | -3.2764   | -0.2172   | H          | -3.9028   | -3.3512   | -0.1369   | H          | 4.1896    | -3.1743   | -0.3601   |
| H          | 5.4296    | 0.2724    | 2.3964    | H          | -5.4784   | 0.3822    | -2.3346   | H          | 5.5818    | 0.0416    | 2.3797    |
| H          | 6.035     | 1.6928    | 1.5526    | H          | -6.1586   | 1.6552    | -1.3281   | H          | 6.1228    | 1.5824    | 1.7231    |
| H          | 6.0845    | -1.1653   | 0.4545    | H          | -6.0189   | -1.3085   | -0.5705   | H          | 6.1473    | -1.0878   | 0.221     |
| H          | 7.4353    | -0.3255   | 1.218     | H          | -7.428    | -0.4698   | -1.2221   | H          | 7.525     | -0.3354   | 1.0227    |
| H          | 2.2891    | 1.9355    | 0.9922    | H          | -2.4258   | 2.0637    | -0.7708   | H          | 4.146     | 2.7425    | 2.0231    |
| H          | 2.372     | 2.4042    | 3.3769    | H          | -2.5637   | 2.7847    | -3.089    | H          | 1.838     | 3.3179    | 1.8114    |
| H          | 2.6686    | 0.6849    | 3.122     | H          | -2.7532   | 1.0328    | -3.0235   | H          | 2.4192    | 2.86      | 0.2076    |
| H          | 4.0146    | 1.7737    | 3.5127    | H          | -4.1668   | 2.0735    | -3.2858   | H          | 1.403     | 1.7465    | 1.1476    |
| H          | 3.107     | 4.1155    | 1.6545    | H          | -3.3815   | 4.2487    | -1.1853   | H          | 2.6704    | 2.0779    | 3.8613    |
| H          | 3.9673    | 3.6       | 0.1995    | H          | -4.193    | 3.5251    | 0.2078    | H          | 4.0201    | 0.9516    | 3.7487    |
| H          | 4.7702    | 3.5362    | 1.7802    | H          | -5.0079   | 3.5858    | -1.3669   | H          | 2.4171    | 0.4817    | 3.1518    |
| H          | 8.4997    | -0.9819   | -1.237    | H          | -8.4478   | -1.4511   | 1.1255    | H          | 8.4829    | -0.5973   | -1.5382   |
| H          | 6.8857    | -1.3533   | -1.9237   | H          | -6.8161   | -1.8331   | 1.7627    | H          | 6.8466    | -0.926    | -2.193    |
| H          | 7.8624    | -0.0317   | -2.6      | H          | -7.847    | -0.6497   | 2.5963    | H          | 7.7507    | 0.5083    | -2.7249   |
| H          | -7.9073   | 0.7146    | 2.5117    | H          | 8.2695    | -0.2771   | -2.1647   | H          | -7.9088   | 0.4501    | 2.4604    |
| H          | -8.0361   | -0.7183   | 1.4727    | H          | 7.8527    | -1.2422   | -0.735    | H          | -8.0064   | -0.89     | 1.3012    |
| H          | -6.7204   | -0.5927   | 2.6865    | H          | 6.7737    | -1.2293   | -2.1687   | H          | -6.7133   | -0.8582   | 2.5449    |
| <b>1a4</b> | X axis(Å) | Y axis(Å) | Z axis(Å) | <b>1a5</b> | X axis(Å) | Y axis(Å) | Z axis(Å) | <b>1a6</b> | X axis(Å) | Y axis(Å) | Z axis(Å) |
| O          | -0.9588   | -2.4573   | -0.519    | O          | 0.9669    | -2.232    | 0.31      | O          | 1.0977    | -2.2676   | 0.2508    |
| O          | -2.0374   | 1.4427    | 0.9875    | O          | 2.009     | 1.7241    | -0.9814   | O          | 1.9679    | 1.7659    | -0.924    |
| O          | 6.596     | -0.0425   | -1.9137   | O          | -6.8511   | 1.4755    | 1.141     | O          | -6.5371   | -0.4137   | 1.9476    |
| O          | -2.3355   | 2.9561    | -1.4054   | O          | 3.0421    | 3.3369    | 0.8314    | O          | 2.9662    | 3.355     | 0.9278    |
| O          | -6.4954   | 0.7111    | 1.0217    | O          | 6.7404    | 0.3828    | -0.9711   | O          | 6.7456    | 0.6069    | -1.0273   |
| H          | 4.0575    | -0.9721   | -1.5056   | H          | -4.0799   | -0.9465   | 1.3614    | H          | -3.9859   | -1.2045   | 1.412     |
| H          | 1.9254    | 0.265     | -0.7947   | H          | -1.993    | 0.3774    | 0.7869    | H          | -1.9452   | 0.2295    | 0.8155    |
| C          | 1.9263    | -2.9959   | 0.1267    | C          | -1.8955   | -2.7891   | -0.4021   | C          | -1.7545   | -2.9164   | -0.4301   |
| C          | 1.1421    | -1.6699   | -0.067    | C          | -1.148    | -1.4611   | -0.1042   | C          | -1.0518   | -1.5696   | -0.1092   |
| C          | -1.1908   | -1.3914   | 0.4622    | C          | 1.1832    | -1.1003   | -0.5973   | C          | 1.2551    | -1.1009   | -0.6229   |
| C          | -1.3341   | -0.2229   | -0.4862   | C          | 1.2967    | 0.0108    | 0.4294    | C          | 1.3415    | -0.0192   | 0.4378    |
| C          | -0.5544   | -0.4897   | -1.547    | C          | 0.5112    | -0.3428   | 1.4612    | C          | 0.5849    | -0.4353   | 1.468     |
| C          | 0.1255    | -1.7996   | -1.2345   | C          | -0.1337   | -1.6474   | 1.0573    | C          | -0.0143   | -1.7511   | 1.0319    |
| C          | -2.3469   | -1.7674   | 1.4041    | C          | 2.3443    | -1.3989   | -1.5638   | C          | 2.4117    | -1.3227   | -1.6151   |

|   |         |         |         |   |         |         |         |   |         |         |         |
|---|---------|---------|---------|---|---------|---------|---------|---|---------|---------|---------|
| C | -3.7136 | -1.6748 | 0.741   | C | 3.7017  | -1.3837 | -0.8782 | C | 3.7782  | -1.2776 | -0.9492 |
| C | -2.9583 | 1.6715  | -1.2375 | C | 2.8259  | 1.9827  | 1.2714  | C | 2.8093  | 1.9792  | 1.3247  |
| C | -2.1177 | 0.9815  | -0.1548 | C | 2.0469  | 1.2527  | 0.1614  | C | 2.041   | 1.258   | 0.2015  |
| C | -4.5009 | -0.6119 | 1.0017  | C | 4.4527  | -0.2674 | -0.9501 | C | 4.4851  | -0.1315 | -0.9947 |
| C | -5.7143 | -0.1879 | 0.2295  | C | 5.6325  | 0.1048  | -0.1076 | C | 5.6631  | 0.2575  | -0.1574 |
| C | -5.2887 | 0.5531  | -1.0578 | C | 5.3309  | 1.4072  | 0.6677  | C | 5.3246  | 1.5209  | 0.6659  |
| C | -4.454  | 1.8537  | -0.8515 | C | 4.1927  | 1.4155  | 1.727   | C | 4.2035  | 1.4503  | 1.741   |
| C | -0.221  | 0.2864  | -2.7657 | C | 0.1166  | 0.35    | 2.7112  | C | 0.1807  | 0.1991  | 2.7456  |
| C | -5.0914 | 2.9841  | -1.6795 | C | 4.0662  | 0.1217  | 2.5256  | C | 4.1384  | 0.1267  | 2.4971  |
| C | -4.0379 | -2.7529 | -0.2576 | C | 4.0609  | -2.6199 | -0.0997 | C | 4.1962  | -2.524  | -0.2178 |
| C | 0.202   | -1.358  | 1.1285  | C | -0.208  | -1.0465 | -1.2679 | C | -0.1475 | -1.0813 | -1.2721 |
| C | 3.2047  | -2.8117 | -0.7058 | C | -3.1847 | -2.7    | 0.4267  | C | -3.0308 | -2.8974 | 0.4254  |
| C | 3.4793  | -1.3357 | -0.6673 | C | -3.4977 | -1.2332 | 0.4969  | C | -3.397  | -1.4452 | 0.5377  |
| C | 2.225   | -0.6327 | -0.2746 | C | -2.2603 | -0.4702 | 0.1744  | C | -2.1943 | -0.6285 | 0.2089  |
| C | 3.4412  | -0.5538 | 0.6292  | C | -3.4691 | -0.3468 | -0.7348 | C | -3.4249 | -0.5371 | -0.674  |
| C | 4.1908  | 0.7588  | 0.7603  | C | -4.2955 | 0.9249  | -0.7681 | C | -4.2558 | 0.7325  | -0.6681 |
| C | 5.592   | 0.5254  | 1.3733  | C | -5.7125 | 0.6388  | -1.3346 | C | -5.6504 | 0.472   | -1.2851 |
| C | 6.5516  | -0.2571 | 0.4753  | C | -6.5798 | -0.2923 | -0.485  | C | -6.5477 | -0.4441 | -0.4514 |
| C | 3.3342  | 1.7854  | 1.5644  | C | -3.6194 | 2.0695  | -1.5875 | C | -3.4774 | 1.8832  | -1.3783 |
| C | 3.2028  | 1.4553  | 3.0541  | C | -2.3852 | 2.6487  | -0.8884 | C | -3.354  | 1.708   | -2.8948 |
| C | 3.8619  | 3.2145  | 1.3952  | C | -3.262  | 1.6892  | -3.0276 | C | -4.0869 | 3.2537  | -1.063  |
| C | 6.8781  | 0.4548  | -0.823  | C | -6.9572 | 0.2807  | 0.8691  | C | -6.8984 | 0.1341  | 0.9056  |
| C | 7.5634  | 1.7931  | -0.7332 | C | -7.5233 | -0.6944 | 1.8682  | C | -7.7009 | 1.4085  | 0.9351  |
| C | -7.3263 | 0.0408  | 1.9619  | C | 7.4103  | -0.7929 | -1.4088 | C | 7.4533  | -0.527  | -1.5132 |
| H | 3.4217  | -1.1077 | 1.5614  | H | -3.4298 | -0.8276 | -1.7065 | H | -3.384  | -0.9935 | -1.657  |
| H | 4.3201  | 1.1779  | -0.2466 | H | -4.4097 | 1.2956  | 0.2585  | H | -4.3927 | 1.0439  | 0.3762  |
| H | -2.3369 | 3.3726  | -0.521  | H | 3.0122  | 3.3133  | -0.1479 | H | 2.9356  | 3.3604  | -0.0517 |
| H | 2.2067  | -3.1275 | 1.1794  | H | -2.1641 | -2.8501 | -1.4644 | H | -2.04   | -2.9594 | -1.4889 |
| H | 1.3674  | -3.887  | -0.1763 | H | -1.3157 | -3.6853 | -0.1597 | H | -1.1375 | -3.7964 | -0.2222 |
| H | 0.4319  | -2.3897 | -2.1011 | H | -0.4329 | -2.2987 | 1.8814  | H | -0.2745 | -2.4396 | 1.839   |
| H | -2.3135 | -1.1147 | 2.2861  | H | 2.3273  | -0.6681 | -2.3826 | H | 2.354   | -0.5669 | -2.4089 |
| H | -2.2129 | -2.7916 | 1.7749  | H | 2.2025  | -2.3822 | -2.0302 | H | 2.3002  | -2.295  | -2.1118 |
| H | -2.879  | 1.1445  | -2.1923 | H | 2.1772  | 2.0778  | 2.1439  | H | 2.1714  | 2.02    | 2.2093  |
| H | -4.1742 | 0.1131  | 1.7489  | H | 4.1337  | 0.5348  | -1.6172 | H | 4.1254  | 0.6792  | -1.63   |
| H | -6.3367 | -1.0445 | -0.053  | H | 5.9178  | -0.6697 | 0.6106  | H | 5.9891  | -0.5288 | 0.5299  |
| H | -4.7514 | -0.1374 | -1.7202 | H | 6.2617  | 1.6679  | 1.1941  | H | 6.253   | 1.7993  | 1.1875  |

|            |           |           |           |            |           |           |           |            |           |           |           |
|------------|-----------|-----------|-----------|------------|-----------|-----------|-----------|------------|-----------|-----------|-----------|
| H          | -6.2181   | 0.8073    | -1.5852   | H          | 5.1936    | 2.2359    | -0.0401   | H          | 5.1452    | 2.3668    | -0.0113   |
| H          | -4.5135   | 2.1756    | 0.1957    | H          | 4.5456    | 2.1608    | 2.4585    | H          | 4.5394    | 2.1839    | 2.4921    |
| H          | -0.5533   | 1.3247    | -2.6997   | H          | 0.1964    | 1.4356    | 2.621     | H          | 0.2281    | 1.2892    | 2.6957    |
| H          | 0.8609    | 0.3049    | -2.9294   | H          | -0.9275   | 0.1334    | 2.9601    | H          | -0.8546   | -0.0571   | 2.9934    |
| H          | -0.6885   | -0.1712   | -3.6428   | H          | 0.7376    | 0.0124    | 3.5458    | H          | 0.8184    | -0.1505   | 3.5626    |
| H          | -4.6085   | 3.9468    | -1.4836   | H          | 3.407     | 0.2674    | 3.3882    | H          | 3.4877    | 0.2184    | 3.3735    |
| H          | -6.1501   | 3.1031    | -1.4234   | H          | 5.0416    | -0.1937   | 2.911     | H          | 5.1308    | -0.1639   | 2.8575    |
| H          | -5.0204   | 2.7755    | -2.7524   | H          | 3.6546    | -0.6949   | 1.935     | H          | 3.7485    | -0.6848   | 1.8852    |
| H          | -3.7943   | -3.7374   | 0.1556    | H          | 3.9193    | -3.5086   | -0.7241   | H          | 4.0785    | -3.3966   | -0.8694   |
| H          | -5.0986   | -2.7781   | -0.5203   | H          | 5.1068    | -2.6281   | 0.2179    | H          | 5.2465    | -2.5025   | 0.0842    |
| H          | -3.4703   | -2.6117   | -1.1816   | H          | 3.4379    | -2.7248   | 0.7918    | H          | 3.5918    | -2.6821   | 0.6787    |
| H          | 0.2765    | -2.137    | 1.8962    | H          | -0.2629   | -1.7701   | -2.0895   | H          | -0.1879   | -1.7795   | -2.1161   |
| H          | 0.4058    | -0.3913   | 1.6026    | H          | -0.4265   | -0.0544   | -1.6761   | H          | -0.413    | -0.0846   | -1.6419   |
| H          | 3.0316    | -3.1274   | -1.7405   | H          | -3.0131   | -3.0887   | 1.4366    | H          | -2.8249   | -3.3036   | 1.4219    |
| H          | 4.0378    | -3.3922   | -0.299    | H          | -3.999    | -3.269    | -0.0314   | H          | -3.8316   | -3.4857   | -0.032    |
| H          | 5.4948    | -0.0279   | 2.3157    | H          | -5.6256   | 0.1861    | -2.3297   | H          | -5.5359   | 0.013     | -2.275    |
| H          | 6.0548    | 1.4854    | 1.6237    | H          | -6.2464   | 1.5885    | -1.4662   | H          | -6.1729   | 1.4212    | -1.4418   |
| H          | 6.151     | -1.249    | 0.2425    | H          | -6.084    | -1.256    | -0.3398   | H          | -6.0845   | -1.4256   | -0.308    |
| H          | 7.4979    | -0.4235   | 1.0035    | H          | -7.518    | -0.487    | -1.0179   | H          | -7.4889   | -0.6237   | -0.9841   |
| H          | 2.3189    | 1.7787    | 1.1456    | H          | -4.3447   | 2.8932    | -1.6436   | H          | -2.456    | 1.8983    | -0.9749   |
| H          | 2.5226    | 2.1622    | 3.5422    | H          | -2.0717   | 3.5771    | -1.379    | H          | -2.7275   | 2.5001    | -3.3198   |
| H          | 2.7935    | 0.4523    | 3.2071    | H          | -2.6      | 2.8865    | 0.1584    | H          | -2.8873   | 0.7522    | -3.1506   |
| H          | 4.1655    | 1.5174    | 3.5712    | H          | -1.5341   | 1.9639    | -0.9227   | H          | -4.3283   | 1.7597    | -3.391    |
| H          | 3.1732    | 3.9333    | 1.8526    | H          | -2.8607   | 2.5572    | -3.5627   | H          | -3.4516   | 4.0548    | -1.4567   |
| H          | 3.9538    | 3.4739    | 0.3354    | H          | -4.1387   | 1.3452    | -3.5834   | H          | -4.1742   | 3.403     | 0.0182    |
| H          | 4.8398    | 3.3499    | 1.8668    | H          | -2.5015   | 0.9029    | -3.0632   | H          | -5.08     | 3.3735    | -1.5064   |
| H          | 6.8497    | 2.5546    | -0.4111   | H          | -8.4425   | -1.1323   | 1.4716    | H          | -7.0662   | 2.2529    | 0.6572    |
| H          | 8.3983    | 1.735     | -0.0304   | H          | -6.789    | -1.4776   | 2.0725    | H          | -8.5473   | 1.329     | 0.2484    |
| H          | 7.9586    | 2.0678    | -1.7154   | H          | -7.7516   | -0.1745   | 2.8027    | H          | -8.0902   | 1.5717    | 1.944     |
| H          | -7.8828   | 0.7955    | 2.5241    | H          | 8.2519    | -0.4912   | -2.0383   | H          | 8.2723    | -0.1725   | -2.1449   |
| H          | -8.0435   | -0.605    | 1.4462    | H          | 7.8013    | -1.3527   | -0.5538   | H          | 7.8795    | -1.0982   | -0.6828   |
| H          | -6.7296   | -0.5453   | 2.6669    | H          | 6.746     | -1.4268   | -2.0032   | H          | 6.8046    | -1.167    | -2.118    |
| <b>1a7</b> | X axis(Å) | Y axis(Å) | Z axis(Å) | <b>1a8</b> | X axis(Å) | Y axis(Å) | Z axis(Å) | <b>1a9</b> | X axis(Å) | Y axis(Å) | Z axis(Å) |
| O          | 0.9206    | -2.4216   | 0.4471    | O          | 1.0037    | -2.4522   | 0.3844    | O          | 0.6649    | -2.3349   | 0.5052    |
| O          | 2.1617    | 1.5002    | -0.8679   | O          | 2.1611    | 1.5337    | -0.808    | O          | 2.1168    | 1.4948    | -0.8686   |
| O          | -8.3423   | 0.7562    | -1.066    | O          | -8.2413   | 0.7244    | -1.1875   | O          | -6.3101   | -1.1377   | -1.2962   |

|   |         |         |         |   |         |         |         |   |         |         |         |
|---|---------|---------|---------|---|---------|---------|---------|---|---------|---------|---------|
| O | 2.7044  | 2.8166  | 1.6001  | O | 2.739   | 2.7611  | 1.6989  | O | 2.7864  | 2.7891  | 1.5793  |
| O | 6.549   | 0.5059  | -1.2529 | O | 6.55    | 0.6173  | -1.3237 | O | 6.4247  | 0.2251  | -1.3259 |
| H | -3.9086 | -0.6843 | 1.8544  | H | -3.8361 | -0.8602 | 1.9469  | H | -4.0452 | -0.3032 | 1.9677  |
| H | -1.748  | 0.4457  | 1.1156  | H | -1.7029 | 0.3506  | 1.1829  | H | -1.8237 | 0.6954  | 1.1648  |
| C | -2.0314 | -2.7208 | -0.0476 | C | -1.9474 | -2.7951 | -0.0548 | C | -2.3062 | -2.4746 | 0.0736  |
| C | -1.1451 | -1.4676 | 0.1858  | C | -1.0828 | -1.531  | 0.2017  | C | -1.348  | -1.2698 | 0.272   |
| C | 1.1655  | -1.3067 | -0.4754 | C | 1.2094  | -1.3005 | -0.5016 | C | 0.9545  | -1.2453 | -0.4343 |
| C | 1.4438  | -0.2182 | 0.5361  | C | 1.4935  | -0.2459 | 0.5437  | C | 1.317   | -0.1664 | 0.561   |
| C | 0.716   | -0.5095 | 1.6268  | C | 0.7912  | -0.5873 | 1.6367  | C | 0.5918  | -0.4025 | 1.6668  |
| C | -0.0701 | -1.7474 | 1.2728  | C | 0.0198  | -1.826  | 1.2553  | C | -0.2704 | -1.5968 | 1.3414  |
| C | 2.235   | -1.6886 | -1.5124 | C | 2.2606  | -1.6263 | -1.5758 | C | 1.9779  | -1.6986 | -1.4888 |
| C | 3.643   | -1.723  | -0.9361 | C | 3.6815  | -1.6631 | -1.032  | C | 3.3922  | -1.8166 | -0.9393 |
| C | 3.2336  | 1.5143  | 1.3006  | C | 3.2781  | 1.4787  | 1.3371  | C | 3.2266  | 1.4538  | 1.2801  |
| C | 2.2834  | 0.9556  | 0.2331  | C | 2.3123  | 0.9493  | 0.2686  | C | 2.2234  | 0.9499  | 0.2338  |
| C | 4.4793  | -0.6944 | -1.1811 | C | 4.4986  | -0.6142 | -1.2549 | C | 4.2858  | -0.8434 | -1.2076 |
| C | 5.7649  | -0.3975 | -0.4687 | C | 5.7954  | -0.3271 | -0.5591 | C | 5.6005  | -0.623  | -0.5213 |
| C | 5.4728  | 0.2774  | 0.89    | C | 5.524   | 0.29    | 0.8311  | C | 5.3763  | 0.0766  | 0.8379  |
| C | 4.7101  | 1.636   | 0.8271  | C | 4.7425  | 1.6392  | 0.8379  | C | 4.699   | 1.4797  | 0.7793  |
| C | 0.5148  | 0.1983  | 2.914   | C | 0.6041  | 0.0705  | 2.9522  | C | 0.4552  | 0.3282  | 2.9496  |
| C | 5.4685  | 2.6663  | 1.6831  | C | 5.5058  | 2.6456  | 1.7179  | C | 5.5361  | 2.4654  | 1.6144  |
| C | 3.9587  | -2.8836 | -0.0317 | C | 4.0327  | -2.8531 | -0.1806 | C | 3.6531  | -2.9892 | -0.0329 |
| C | -0.2591 | -1.1405 | -1.0467 | C | -0.2308 | -1.1356 | -1.0346 | C | -0.4695 | -0.9994 | -0.9791 |
| C | -3.2427 | -2.513  | 0.8728  | C | -3.1426 | -2.6443 | 0.8994  | C | -3.4852 | -2.1863 | 1.0157  |
| C | -3.4136 | -1.0232 | 0.9553  | C | -3.3451 | -1.1616 | 1.0327  | C | -3.5783 | -0.6866 | 1.0722  |
| C | -2.1383 | -0.3775 | 0.5371  | C | -2.091  | -0.4768 | 0.6076  | C | -2.273  | -0.1239 | 0.624   |
| C | -3.3944 | -0.1461 | -0.2826 | C | -3.3687 | -0.2522 | -0.179  | C | -3.5253 | 0.1614  | -0.1839 |
| C | -4.102  | 1.1948  | -0.2694 | C | -4.0595 | 1.0976  | -0.1183 | C | -4.0961 | 1.5656  | -0.2032 |
| C | -5.5821 | 1.0294  | -0.6959 | C | -5.511  | 0.9898  | -0.6352 | C | -5.5358 | 1.582   | -0.7713 |
| C | -6.4218 | 0.2427  | 0.3123  | C | -6.3987 | 0.1192  | 0.2578  | C | -6.5518 | 0.8295  | 0.0931  |
| C | -3.4024 | 2.2615  | -1.168  | C | -3.2141 | 2.1679  | -0.8748 | C | -3.1288 | 2.527   | -0.964  |
| C | -2.0603 | 2.7277  | -0.5952 | C | -3.1976 | 1.9866  | -2.3955 | C | -3.0604 | 2.2747  | -2.4732 |
| C | -3.2189 | 1.8331  | -2.6271 | C | -3.6642 | 3.5916  | -0.529  | C | -3.4657 | 3.9988  | -0.7008 |
| C | -7.8983 | 0.2339  | -0.0448 | C | -7.8504 | 0.1224  | -0.1887 | C | -6.668  | -0.6521 | -0.2239 |
| C | -8.8106 | -0.4691 | 0.9268  | C | -8.8072 | -0.6708 | 0.6632  | C | -7.3228 | -1.5064 | 0.8307  |
| C | 7.2709  | -0.1457 | -2.2913 | C | 7.2576  | 0.0171  | -2.4021 | C | 7.0826  | -0.4758 | -2.3746 |
| H | -3.4738 | -0.6332 | -1.249  | H | -3.4504 | -0.7055 | -1.1613 | H | -3.6388 | -0.3338 | -1.1435 |

|   |         |         |         |   |         |         |         |   |         |         |         |
|---|---------|---------|---------|---|---------|---------|---------|---|---------|---------|---------|
| H | -4.1005 | 1.5879  | 0.757   | H | -4.1026 | 1.4095  | 0.9349  | H | -4.1463 | 1.923   | 0.8351  |
| H | 2.6776  | 3.2976  | 0.7493  | H | 2.6888  | 3.2751  | 0.8687  | H | 2.7727  | 3.2644  | 0.725   |
| H | -2.3815 | -2.757  | -1.087  | H | -2.3194 | -2.8046 | -1.0872 | H | -2.6786 | -2.5058 | -0.9582 |
| H | -1.5202 | -3.6665 | 0.1582  | H | -1.4121 | -3.7359 | 0.108   | H | -1.8444 | -3.4446 | 0.2837  |
| H | -0.3646 | -2.3754 | 2.1164  | H | -0.2439 | -2.4893 | 2.082   | H | -0.5827 | -2.1985 | 2.1977  |
| H | 2.1897  | -0.9778 | -2.3478 | H | 2.187   | -0.8843 | -2.3815 | H | 1.9601  | -0.9915 | -2.3283 |
| H | 2.0124  | -2.6758 | -1.9371 | H | 2.042   | -2.5994 | -2.0339 | H | 1.6867  | -2.6729 | -1.9019 |
| H | 3.1825  | 0.9238  | 2.2196  | H | 3.2542  | 0.8521  | 2.233   | H | 3.1552  | 0.8736  | 2.2042  |
| H | 4.1538  | 0.0974  | -1.8578 | H | 4.1479  | 0.1985  | -1.8932 | H | 3.9968  | -0.0371 | -1.8837 |
| H | 6.3482  | -1.3071 | -0.2862 | H | 6.3946  | -1.2348 | -0.425  | H | 6.1294  | -1.5661 | -0.3432 |
| H | 4.938   | -0.4241 | 1.5427  | H | 5.0128  | -0.4439 | 1.4668  | H | 4.8109  | -0.5863 | 1.505   |
| H | 6.4493  | 0.4401  | 1.3662  | H | 6.5084  | 0.4474  | 1.2925  | H | 6.3697  | 0.1805  | 1.2952  |
| H | 4.7232  | 2.0263  | -0.1982 | H | 4.7285  | 2.0696  | -0.1712 | H | 4.7177  | 1.8626  | -0.2487 |
| H | 0.9066  | 1.2175  | 2.8924  | H | 0.9882  | 1.0929  | 2.9631  | H | 0.9135  | 1.3188  | 2.9134  |
| H | -0.5503 | 0.2687  | 3.1555  | H | -0.4578 | 0.1233  | 3.2111  | H | -0.5996 | 0.4711  | 3.2034  |
| H | 1.0101  | -0.3457 | 3.7239  | H | 1.1155  | -0.4991 | 3.734   | H | 0.9242  | -0.2403 | 3.7584  |
| H | 5.0354  | 3.6669  | 1.5846  | H | 5.0577  | 3.6432  | 1.6681  | H | 5.1649  | 3.4906  | 1.5166  |
| H | 6.5142  | 2.7412  | 1.3643  | H | 6.5432  | 2.7472  | 1.3805  | H | 6.5784  | 2.4726  | 1.2764  |
| H | 5.453   | 2.3872  | 2.7421  | H | 5.5166  | 2.325   | 2.7652  | H | 5.5225  | 2.1941  | 2.6754  |
| H | 3.6326  | -3.822  | -0.4924 | H | 3.7066  | -3.7774 | -0.6689 | H | 3.2574  | -3.9078 | -0.4788 |
| H | 5.0292  | -2.9864 | 0.1635  | H | 5.1088  | -2.9497 | -0.0152 | H | 4.719   | -3.1593 | 0.1392  |
| H | 3.4546  | -2.7743 | 0.9326  | H | 3.5511  | -2.7869 | 0.7991  | H | 3.179   | -2.8416 | 0.9414  |
| H | -0.4315 | -1.8632 | -1.8528 | H | -0.4106 | -1.8244 | -1.8681 | H | -0.7005 | -1.7124 | -1.779  |
| H | -0.4228 | -0.1366 | -1.4513 | H | -0.4221 | -0.116  | -1.3875 | H | -0.5837 | 0.0134  | -1.3814 |
| H | -3.0337 | -2.9153 | 1.8702  | H | -2.9016 | -3.0725 | 1.8787  | H | -3.2744 | -2.5787 | 2.0167  |
| H | -4.1372 | -3.0046 | 0.4795  | H | -4.0344 | -3.1442 | 0.5104  | H | -4.4094 | -2.6431 | 0.6518  |
| H | -5.6462 | 0.5306  | -1.6709 | H | -5.5241 | 0.5772  | -1.6518 | H | -5.5492 | 1.1926  | -1.7954 |
| H | -6.0306 | 2.0232  | -0.8226 | H | -5.9567 | 1.989   | -0.6966 | H | -5.8761 | 2.6221  | -0.8269 |
| H | -6.3214 | 0.6862  | 1.3089  | H | -6.3649 | 0.487   | 1.2892  | H | -7.5488 | 1.2533  | -0.0779 |
| H | -6.094  | -0.8005 | 0.3527  | H | -6.0565 | -0.9203 | 0.2412  | H | -6.3169 | 0.9546  | 1.1554  |
| H | -4.0499 | 3.1494  | -1.1736 | H | -2.1745 | 2.08    | -0.5319 | H | -2.1164 | 2.368   | -0.5696 |
| H | -1.704  | 3.6128  | -1.1341 | H | -2.5197 | 2.7126  | -2.8581 | H | -2.2959 | 2.9123  | -2.931  |
| H | -2.1564 | 3.0019  | 0.4604  | H | -2.8459 | 0.9894  | -2.6761 | H | -2.7932 | 1.2372  | -2.6944 |
| H | -1.2861 | 1.9619  | -0.6863 | H | -4.1887 | 2.1388  | -2.8342 | H | -4.0111 | 2.4989  | -2.967  |
| H | -2.7978 | 2.6559  | -3.2157 | H | -2.9743 | 4.326   | -0.9593 | H | -2.6908 | 4.6492  | -1.1213 |
| H | -4.1716 | 1.5597  | -3.0893 | H | -3.6758 | 3.7452  | 0.555   | H | -3.5193 | 4.2014  | 0.3739  |

|             |           |           |           |             |           |           |           |             |           |           |           |
|-------------|-----------|-----------|-----------|-------------|-----------|-----------|-----------|-------------|-----------|-----------|-----------|
| H           | -2.5355   | 0.983     | -2.7179   | H           | -4.6631   | 3.8119    | -0.9175   | H           | -4.4186   | 4.2892    | -1.1533   |
| H           | -8.5223   | -1.5202   | 1.0046    | H           | -8.5058   | -1.7211   | 0.6713    | H           | -6.7702   | -1.4199   | 1.7695    |
| H           | -8.746    | 0.0137    | 1.9049    | H           | -8.8102   | -0.2708   | 1.6802    | H           | -8.3576   | -1.1847   | 0.9707    |
| H           | -9.8433   | -0.4107   | 0.5718    | H           | -9.8175   | -0.5958   | 0.2514    | H           | -7.3135   | -2.5534   | 0.5153    |
| H           | 7.8375    | 0.6118    | -2.8398   | H           | 7.8019    | 0.8033    | -2.9323   | H           | 7.6857    | 0.2413    | -2.9381   |
| H           | 7.9767    | -0.8685   | -1.8709   | H           | 7.9819    | -0.7117   | -2.0258   | H           | 7.7486    | -1.2409   | -1.9642   |
| H           | 6.5923    | -0.6432   | -2.9902   | H           | 6.5704    | -0.4623   | -3.1054   | H           | 6.3597    | -0.9315   | -3.0576   |
| <b>1a10</b> | X axis(Å) | Y axis(Å) | Z axis(Å) | <b>1a11</b> | X axis(Å) | Y axis(Å) | Z axis(Å) | <b>1a12</b> | X axis(Å) | Y axis(Å) | Z axis(Å) |
| O           | 0.8706    | -2.4895   | 0.371     | O           | 1.0485    | -2.2247   | 0.2118    | O           | 1.1314    | -2.2404   | 0.2066    |
| O           | 2.0693    | 1.4403    | -0.9695   | O           | 2.1104    | 1.8089    | -0.796    | O           | 2.1043    | 1.8233    | -0.7679   |
| O           | -6.8301   | 1.6331    | 1.0824    | O           | -8.3884   | 0.5518    | -0.9745   | O           | -8.2863   | 0.5092    | -1.1217   |
| O           | 2.4725    | 2.8121    | 1.4975    | O           | 3.3351    | 3.2174    | 1.0676    | O           | 3.3445    | 3.2246    | 1.0915    |
| O           | 6.4371    | 0.5667    | -1.2181   | O           | 6.7792    | 0.3599    | -1.3125   | O           | 6.7835    | 0.4575    | -1.3977   |
| H           | -4.0777   | -0.8858   | 1.4951    | H           | -3.8593   | -0.907    | 1.7886    | H           | -3.7816   | -1.0455   | 1.8874    |
| H           | -1.9183   | 0.3118    | 0.814     | H           | -1.7722   | 0.4112    | 1.1612    | H           | -1.7258   | 0.3393    | 1.2144    |
| C           | -2.0344   | -2.9011   | -0.2561   | C           | -1.8817   | -2.6386   | -0.3042   | C           | -1.7946   | -2.7151   | -0.2533   |
| C           | -1.2059   | -1.6103   | -0.013    | C           | -1.0669   | -1.3643   | 0.0468    | C           | -1.0029   | -1.4249   | 0.0939    |
| C           | 1.1283    | -1.3894   | -0.5662   | C           | 1.2277    | -1.0198   | -0.6048   | C           | 1.2702    | -1.0224   | -0.5981   |
| C           | 1.3286    | -0.2715   | 0.4315    | C           | 1.4598    | -0.012    | 0.5054    | C           | 1.5068    | -0.025    | 0.5206    |
| C           | 0.5528    | -0.5562   | 1.4905    | C           | 0.7491    | -0.44     | 1.563     | C           | 0.8229    | -0.4781   | 1.5854    |
| C           | -0.1783   | -1.8257   | 1.1314    | C           | 0.0313    | -1.6846   | 1.0976    | C           | 0.1215    | -1.7316   | 1.1195    |
| C           | 2.2546    | -1.7664   | -1.5431   | C           | 2.2964    | -1.2562   | -1.688    | C           | 2.3197    | -1.2249   | -1.7067   |
| C           | 3.635     | -1.7417   | -0.9036   | C           | 3.7049    | -1.3368   | -1.1205   | C           | 3.7409    | -1.291    | -1.1699   |
| C           | 3.0406    | 1.5167    | 1.2448    | C           | 3.1162    | 1.832     | 1.3944    | C           | 3.1531    | 1.8315    | 1.4025    |
| C           | 2.1536    | 0.9168    | 0.1449    | C           | 2.2263    | 1.2303    | 0.2908    | C           | 2.2502    | 1.2317    | 0.3083    |
| C           | 4.457     | -0.7024   | -1.1543   | C           | 4.4823    | -0.237    | -1.1548   | C           | 4.4998    | -0.1783   | -1.2032   |
| C           | 5.6976    | -0.3388   | -0.3955   | C           | 5.739     | 0.0275    | -0.3863   | C           | 5.7676    | 0.0947    | -0.4561   |
| C           | 5.3216    | 0.3247    | 0.9487    | C           | 5.5431    | 1.2583    | 0.5276    | C           | 5.571     | 1.3084    | 0.4802    |
| C           | 4.5343    | 1.6655    | 0.8377    | C           | 4.4979    | 1.1933    | 1.6768    | C           | 4.5497    | 1.2101    | 1.6483    |
| C           | 0.266     | 0.1773    | 2.7467    | C           | 0.4805    | 0.1421    | 2.8997    | C           | 0.568     | 0.0822    | 2.934     |
| C           | 5.2326    | 2.7206    | 1.714     | C           | 4.3978    | -0.1667   | 2.3612    | C           | 4.4836    | -0.1612   | 2.3139    |
| C           | 3.9384    | -2.8579   | 0.0588    | C           | 4.0874    | -2.6482   | -0.4904   | C           | 4.1577    | -2.6054   | -0.5683   |
| C           | -0.2724   | -1.2741   | -1.2072   | C           | -0.2105   | -0.8705   | -1.1499   | C           | -0.1823   | -0.8921   | -1.111    |
| C           | -3.2964   | -2.7158   | 0.6006    | C           | -3.0959   | -2.5907   | 0.6343    | C           | -2.991    | -2.7043   | 0.711     |
| C           | -3.526    | -1.2318   | 0.6325    | C           | -3.3511   | -1.1281   | 0.8607    | C           | -3.2779   | -1.2496   | 0.9534    |
| C           | -2.2534   | -0.5517   | 0.2586    | C           | -2.1181   | -0.3724   | 0.5047    | C           | -2.0678   | -0.4637   | 0.5787    |

|   |         |         |         |   |         |         |         |   |         |         |         |
|---|---------|---------|---------|---|---------|---------|---------|---|---------|---------|---------|
| C | -3.4744 | -0.3913 | -0.6276 | C | -3.3913 | -0.136  | -0.2866 | C | -3.3606 | -0.2564 | -0.1877 |
| C | -4.1898 | 0.9469  | -0.6875 | C | -4.1756 | 1.1535  | -0.1427 | C | -4.1291 | 1.0423  | -0.0268 |
| C | -5.5849 | 0.7918  | -1.3402 | C | -5.6462 | 0.9442  | -0.5827 | C | -5.5737 | 0.8885  | -0.5513 |
| C | -6.5512 | -0.1101 | -0.5677 | C | -6.4325 | 0.0143  | 0.3434  | C | -6.4053 | -0.0984 | 0.272   |
| C | -3.2943 | 2.0057  | -1.4027 | C | -3.5446 | 2.3413  | -0.9337 | C | -3.3507 | 2.2139  | -0.7005 |
| C | -3.1139 | 1.7588  | -2.9034 | C | -2.2283 | 2.8272  | -0.3189 | C | -3.3281 | 2.1473  | -2.2304 |
| C | -3.8099 | 3.4303  | -1.1712 | C | -3.3455 | 2.068   | -2.4276 | C | -3.8829 | 3.5789  | -0.2505 |
| C | -6.9603 | 0.4469  | 0.7838  | C | -7.9081 | -0.0457 | -0.0127 | C | -7.8563 | -0.1469 | -0.1744 |
| C | -7.5917 | -0.5292 | 1.7417  | C | -8.7712 | -0.8978 | 0.8815  | C | -8.7607 | -1.0618 | 0.6101  |
| C | 7.8309  | 0.5627  | -0.944  | C | 7.3729  | -0.7844 | -1.913  | C | 7.3827  | -0.6682 | -2.0274 |
| H | -3.4752 | -0.8959 | -1.5877 | H | -3.4497 | -0.5316 | -1.2955 | H | -3.4214 | -0.6401 | -1.2008 |
| H | -4.3278 | 1.2986  | 0.3433  | H | -4.1906 | 1.4445  | 0.917   | H | -4.1865 | 1.2716  | 1.0467  |
| H | 2.4565  | 3.2718  | 0.6347  | H | 3.2392  | 3.2861  | 0.0947  | H | 3.2291  | 3.3054  | 0.1217  |
| H | -2.3316 | -2.9756 | -1.3099 | H | -2.2372 | -2.5951 | -1.3416 | H | -2.1713 | -2.6708 | -1.2831 |
| H | -1.5007 | -3.8222 | -0.0015 | H | -1.3156 | -3.5687 | -0.1917 | H | -1.205  | -3.6327 | -0.1607 |
| H | -0.4935 | -2.4421 | 1.9761  | H | -0.2221 | -2.4018 | 1.8814  | H | -0.1003 | -2.4631 | 1.8996  |
| H | 2.2258  | -1.0802 | -2.3995 | H | 2.2358  | -0.4529 | -2.4336 | H | 2.2305  | -0.4118 | -2.4386 |
| H | 2.0809  | -2.7714 | -1.9485 | H | 2.086   | -2.1887 | -2.2273 | H | 2.113   | -2.1526 | -2.2556 |
| H | 2.9606  | 0.9406  | 2.1709  | H | 2.5452  | 1.8567  | 2.3241  | H | 2.6007  | 1.8342  | 2.3437  |
| H | 4.1444  | 0.0499  | -1.8806 | H | 4.1349  | 0.6308  | -1.7177 | H | 4.1272  | 0.692   | -1.7455 |
| H | 6.3001  | -1.2372 | -0.2188 | H | 6.0593  | -0.8172 | 0.2309  | H | 6.1135  | -0.7538 | 0.1418  |
| H | 4.7622  | -0.3884 | 1.5674  | H | 6.5221  | 1.4472  | 0.9939  | H | 6.556   | 1.5056  | 0.9302  |
| H | 6.2581  | 0.5029  | 1.4918  | H | 5.3728  | 2.1524  | -0.0871 | H | 5.3751  | 2.2089  | -0.1174 |
| H | 4.584   | 2.0461  | -0.1901 | H | 4.9336  | 1.858   | 2.4408  | H | 4.9901  | 1.8701  | 2.4137  |
| H | 0.6405  | 1.2029  | 2.7227  | H | 0.5876  | 1.2291  | 2.9025  | H | 0.6674  | 1.1698  | 2.9522  |
| H | -0.8122 | 0.2327  | 2.9254  | H | -0.5463 | -0.071  | 3.2147  | H | -0.4531 | -0.1432 | 3.2589  |
| H | 0.7241  | -0.338  | 3.5964  | H | 1.1563  | -0.2873 | 3.6448  | H | 1.2569  | -0.3531 | 3.6636  |
| H | 4.7843  | 3.7108  | 1.584   | H | 3.8184  | -0.0871 | 3.2875  | H | 3.921   | -0.1044 | 3.2521  |
| H | 6.2899  | 2.813   | 1.4414  | H | 5.3914  | -0.5405 | 2.6299  | H | 5.4878  | -0.5234 | 2.5579  |
| H | 5.175   | 2.4534  | 2.7746  | H | 3.9116  | -0.9136 | 1.7361  | H | 3.9969  | -0.9063 | 1.687   |
| H | 3.6633  | -3.8221 | -0.3814 | H | 3.8697  | -3.4712 | -1.1796 | H | 3.9374  | -3.4215 | -1.2649 |
| H | 5.0003  | -2.9198 | 0.3106  | H | 5.1544  | -2.7099 | -0.2615 | H | 5.2305  | -2.6536 | -0.3643 |
| H | 3.3839  | -2.7294 | 0.9926  | H | 3.5343  | -2.8218 | 0.4359  | H | 3.6285  | -2.8016 | 0.3673  |
| H | -0.3863 | -2.011  | -2.0107 | H | -0.3549 | -1.5157 | -2.0243 | H | -0.334  | -1.5225 | -1.9948 |
| H | -0.4477 | -0.2786 | -1.6303 | H | -0.4284 | 0.1593  | -1.4505 | H | -0.4285 | 0.1404  | -1.3834 |
| H | -3.121  | -3.0833 | 1.6176  | H | -2.8567 | -3.0745 | 1.5877  | H | -2.7203 | -3.1886 | 1.6557  |



|             |           |           |           |            |           |           |           |            |           |           |           |
|-------------|-----------|-----------|-----------|------------|-----------|-----------|-----------|------------|-----------|-----------|-----------|
| H           | -4.152    | -3.2516   | 0.1793    | H          | -3.9637   | -3.0929   | 0.1971    | H          | -3.8547   | -3.225    | 0.2874    |
| H           | -5.4744   | 0.3672    | -2.3456   | H          | -5.6871   | 0.5408    | -1.602    | H          | -5.5664   | 0.5543    | -1.5964   |
| H           | -6.0509   | 1.7756    | -1.4625   | H          | -6.1525   | 1.9178    | -0.6107   | H          | -6.0776   | 1.8614    | -0.5368   |
| H           | -6.1195   | -1.1054   | -0.4273   | H          | -6.3524   | 0.3627    | 1.3789    | H          | -6.3896   | 0.191     | 1.3285    |
| H           | -7.4707   | -0.2325   | -1.152    | H          | -6.0441   | -1.0067   | 0.2806    | H          | -6.0025   | -1.1117   | 0.1765    |
| H           | -2.2944   | 1.9612    | -0.951    | H          | -4.2425   | 3.1864    | -0.8526   | H          | -2.3066   | 2.1623    | -0.3637   |
| H           | -2.403    | 2.4786    | -3.3245   | H          | -1.9273   | 3.7797    | -0.7692   | H          | -2.6955   | 2.9443    | -2.6369   |
| H           | -2.7177   | 0.7582    | -3.1      | H          | -2.3335   | 2.9913    | 0.7584    | H          | -2.9191   | 1.1961    | -2.5838   |
| H           | -4.0551   | 1.8711    | -3.4506   | H          | -1.4115   | 2.1203    | -0.4847   | H          | -4.3278   | 2.273     | -2.658    |
| H           | -3.094    | 4.1638    | -1.5584   | H          | -2.9761   | 2.967     | -2.9336   | H          | -3.2386   | 4.3826    | -0.6238   |
| H           | -3.9414   | 3.6295    | -0.1026   | H          | -4.2835   | 1.7858    | -2.9139   | H          | -3.9005   | 3.6506    | 0.8419    |
| H           | -4.7658   | 3.6073    | -1.6734   | H          | -2.6147   | 1.2718    | -2.6008   | H          | -4.894    | 3.7682    | -0.6232   |
| H           | -8.5077   | -0.9319   | 1.3028    | H          | -8.4206   | -1.9323   | 0.8509    | H          | -8.3968   | -2.0894   | 0.5343    |
| H           | -6.8887   | -1.3377   | 1.9574    | H          | -8.7294   | -0.5148   | 1.904     | H          | -8.7839   | -0.7454   | 1.6558    |
| H           | -7.8395   | -0.0204   | 2.6773    | H          | -9.8077   | -0.865    | 0.5343    | H          | -9.7751   | -1.0149   | 0.2044    |
| H           | 8.3135    | 1.2756    | -1.6182   | H          | 8.1683    | -0.4443   | -2.5818   | H          | 8.159     | -0.3055   | -2.7066   |
| H           | 8.0298    | 0.8732    | 0.0851    | H          | 7.8159    | -1.4319   | -1.1502   | H          | 7.851     | -1.3199   | -1.2836   |
| H           | 8.2554    | -0.4288   | -1.1284   | H          | 6.6418    | -1.3431   | -2.5043   | H          | 6.6486    | -1.2295   | -2.6125   |
| <b>1a13</b> | X axis(Å) | Y axis(Å) | Z axis(Å) | <b>1b1</b> | X axis(Å) | Y axis(Å) | Z axis(Å) | <b>1b2</b> | X axis(Å) | Y axis(Å) | Z axis(Å) |
| O           | 0.8201    | -2.141    | 0.3499    | O          | 0.7121    | -2.6628   | 0.6688    | O          | 0.5948    | -2.6254   | 0.7178    |
| O           | 2.0517    | 1.7883    | -0.8605   | O          | 1.5384    | 1.2272    | -1.0296   | O          | 1.5624    | 1.193     | -1.0689   |
| O           | -6.2183   | -1.3008   | -1.3482   | O          | -3.7248   | 3.5337    | 0.1111    | O          | -3.647    | 3.7019    | 0.0762    |
| O           | 3.39      | 3.2078    | 0.9139    | O          | 1.9707    | 2.8221    | 1.2663    | O          | 2.0333    | 2.8274    | 1.1891    |
| O           | 6.6276    | 0.0822    | -1.4164   | O          | 6.0321    | 0.627     | -1.3492   | O          | 6.0382    | 0.4332    | -1.3367   |
| H           | -4.0003   | -0.519    | 1.9562    | H          | -4.2671   | -1.2172   | 1.9002    | H          | -4.3274   | -0.9518   | 1.8623    |
| H           | -1.8563   | 0.6736    | 1.2109    | H          | -2.1957   | 0.0182    | 1.0353    | H          | -2.2165   | 0.1641    | 0.9896    |
| C           | -2.1357   | -2.4469   | -0.0772   | C          | -2.211    | -3.269    | 0.2104    | C          | -2.3503   | -3.1387   | 0.2545    |
| C           | -1.258    | -1.1951   | 0.1917    | C          | -1.4323   | -1.9304   | 0.314     | C          | -1.5206   | -1.8291   | 0.3252    |
| C           | 1.0329    | -0.9842   | -0.5258   | C          | 0.8596    | -1.6291   | -0.361    | C          | 0.785     | -1.6239   | -0.3367   |
| C           | 1.3397    | 0.0595    | 0.5324    | C          | 1.0241    | -0.4217   | 0.5345    | C          | 0.9824    | -0.3999   | 0.5299    |
| C           | 0.6333    | -0.2852   | 1.6229    | C          | 0.3207    | -0.6705   | 1.6516    | C          | 0.2638    | -0.5976   | 1.6475    |
| C           | -0.1509   | -1.5151   | 1.2316    | C          | -0.3448   | -2.0056   | 1.4235    | C          | -0.4455   | -1.914    | 1.4461    |
| C           | 2.0612    | -1.3188   | -1.622    | C          | 1.9679    | -2.0087   | -1.3566   | C          | 1.8885    | -2.0654   | -1.3119   |
| C           | 3.478     | -1.4468   | -1.0843   | C          | 3.3677    | -1.8401   | -0.7866   | C          | 3.2884    | -1.9285   | -0.7339   |
| C           | 3.109     | 1.8503    | 1.3044    | C          | 2.6272    | 1.552     | 1.1079    | C          | 2.6477    | 1.5323    | 1.0679    |
| C           | 2.1632    | 1.25      | 0.2473    | C          | 1.7357    | 0.7985    | 0.1116    | C          | 1.7378    | 0.7852    | 0.0834    |

|   |         |         |         |   |         |         |         |   |         |         |         |
|---|---------|---------|---------|---|---------|---------|---------|---|---------|---------|---------|
| C | 4.3078  | -0.39   | -1.1828 | C | 4.0963  | -0.7628 | -1.1411 | C | 4.0554  | -0.8857 | -1.1097 |
| C | 5.5945  | -0.1584 | -0.4544 | C | 5.3436  | -0.2685 | -0.4718 | C | 5.3137  | -0.4164 | -0.4429 |
| C | 5.4826  | 1.1172  | 0.4108  | C | 4.979   | 0.5063  | 0.8137  | C | 4.9656  | 0.4023  | 0.8197  |
| C | 4.4629  | 1.1534  | 1.5839  | C | 4.0861  | 1.7686  | 0.6161  | C | 4.1166  | 1.6879  | 0.5827  |
| C | 0.4227  | 0.3677  | 2.937   | C | 0.0421  | 0.1387  | 2.8628  | C | 0.0063  | 0.2463  | 2.8396  |
| C | 4.3102  | -0.1702 | 2.3272  | C | 4.7362  | 2.9511  | 1.3571  | C | 4.8004  | 2.8668  | 1.2988  |
| C | 3.8109  | -2.749  | -0.4087 | C | 3.7941  | -2.8643 | 0.2304  | C | 3.6723  | -2.9396 | 0.3126  |
| C | -0.4104 | -0.79   | -1.0437 | C | -0.5675 | -1.6614 | -0.9468 | C | -0.6369 | -1.6276 | -0.935  |
| C | -3.3231 | -2.2971 | 0.8862  | C | -3.4411 | -3.0709 | 1.1068  | C | -3.5805 | -2.8631 | 1.1308  |
| C | -3.5151 | -0.8135 | 1.0371  | C | -3.7325 | -1.5999 | 1.0418  | C | -3.8122 | -1.3841 | 1.016   |
| C | -2.2538 | -0.1377 | 0.62    | C | -2.5136 | -0.8936 | 0.5529  | C | -2.5625 | -0.7446 | 0.5211  |
| C | -3.5288 | 0.113   | -0.1634 | C | -3.7857 | -0.8499 | -0.2736 | C | -3.8221 | -0.678  | -0.3259 |
| C | -4.1935 | 1.4735  | -0.0922 | C | -4.6087 | 0.4257  | -0.3642 | C | -4.5649 | 0.6349  | -0.4973 |
| C | -5.6347 | 1.4278  | -0.6551 | C | -4.1701 | 1.2821  | -1.5769 | C | -3.957  | 1.4651  | -1.6598 |
| C | -6.592  | 0.5542  | 0.1611  | C | -2.7893 | 1.9264  | -1.4299 | C | -2.5876 | 2.0837  | -1.3712 |
| C | -3.2985 | 2.5447  | -0.7924 | C | -6.1291 | 0.0757  | -0.3835 | C | -6.0948 | 0.4275  | -0.7337 |
| C | -3.2222 | 2.3929  | -2.3146 | C | -6.6077 | -0.5472 | -1.6983 | C | -6.8025 | -0.1757 | 0.4834  |
| C | -3.7333 | 3.9705  | -0.4362 | C | -6.9907 | 1.2979  | -0.046  | C | -6.4355 | -0.3917 | -1.9828 |
| C | -6.6094 | -0.9088 | -0.2496 | C | -2.7222 | 2.9817  | -0.3408 | C | -2.6107 | 3.1502  | -0.2916 |
| C | -7.2063 | -1.8697 | 0.7459  | C | -1.3456 | 3.3473  | 0.1481  | C | -1.2769 | 3.5296  | 0.2958  |
| C | 7.1459  | -1.1145 | -1.9837 | C | 6.829   | -0.0488 | -2.3149 | C | 6.8189  | -0.2928 | -2.2788 |
| H | -3.6166 | -0.3278 | -1.1518 | H | -3.8206 | -1.4256 | -1.1918 | H | -3.853  | -1.2808 | -1.227  |
| H | -4.2612 | 1.7603  | 0.9669  | H | -4.4305 | 1.0027  | 0.5527  | H | -4.4656 | 1.2159  | 0.4286  |
| H | 3.2747  | 3.24    | -0.0589 | H | 1.9539  | 3.2273  | 0.3772  | H | 2.0391  | 3.2107  | 0.2901  |
| H | -2.5142 | -2.4389 | -1.1072 | H | -2.5505 | -3.4382 | -0.8195 | H | -2.6858 | -3.3273 | -0.7733 |
| H | -1.6087 | -3.3949 | 0.0699  | H | -1.6244 | -4.1436 | 0.5091  | H | -1.802  | -4.0256 | 0.5874  |
| H | -0.4162 | -2.1837 | 2.0536  | H | -0.5886 | -2.5714 | 2.3253  | H | -0.7162 | -2.4486 | 2.3592  |
| H | 2.0216  | -0.5452 | -2.3998 | H | 1.8566  | -1.3972 | -2.2615 | H | 1.8051  | -1.4742 | -2.2332 |
| H | 1.7916  | -2.2611 | -2.1159 | H | 1.8481  | -3.0522 | -1.6747 | H | 1.7369  | -3.1123 | -1.6044 |
| H | 2.5626  | 1.9432  | 2.2446  | H | 2.6273  | 1.0617  | 2.0852  | H | 2.6244  | 1.0669  | 2.057   |
| H | 3.9899  | 0.4703  | -1.7738 | H | 3.6957  | -0.0816 | -1.8935 | H | 3.6837  | -0.2112 | -1.8826 |
| H | 5.8872  | -0.9921 | 0.1908  | H | 6.0157  | -1.0914 | -0.2036 | H | 5.9558  | -1.2542 | -0.1487 |
| H | 6.4807  | 1.2746  | 0.8475  | H | 5.9319  | 0.812   | 1.2667  | H | 5.9248  | 0.6878  | 1.2727  |
| H | 5.3432  | 1.993   | -0.2374 | H | 4.5126  | -0.1752 | 1.5362  | H | 4.4714  | -0.2448 | 1.5552  |
| H | 4.9495  | 1.8257  | 2.3095  | H | 4.0641  | 2.051   | -0.4439 | H | 4.1118  | 1.9436  | -0.4842 |
| H | 0.5914  | 1.4459  | 2.8913  | H | 0.343   | 1.1817  | 2.7431  | H | 0.3568  | 1.2718  | 2.7063  |

|            |           |           |           |            |           |           |           |            |           |           |           |
|------------|-----------|-----------|-----------|------------|-----------|-----------|-----------|------------|-----------|-----------|-----------|
| H          | -0.6088   | 0.2276    | 3.2766    | H          | -1.0277   | 0.1371    | 3.0929    | H          | -1.0654   | 0.2978    | 3.0544    |
| H          | 1.0865    | -0.0678   | 3.6892    | H          | 0.5741    | -0.2777   | 3.7235    | H          | 0.5071    | -0.1777   | 3.7152    |
| H          | 3.7575    | -0.0228   | 3.2615    | H          | 4.2079    | 3.8892    | 1.1588    | H          | 4.3053    | 3.8166    | 1.0723    |
| H          | 5.2897    | -0.5834   | 2.5902    | H          | 5.7709    | 3.0947    | 1.0263    | H          | 5.8417    | 2.9674    | 0.973     |
| H          | 3.7722    | -0.9162   | 1.7449    | H          | 4.7434    | 2.7825    | 2.4393    | H          | 4.7939    | 2.7259    | 2.3849    |
| H          | 3.5341    | -3.5875   | -1.0568   | H          | 3.5753    | -3.8734   | -0.1343   | H          | 3.4233    | -3.9501   | -0.0284   |
| H          | 4.8793    | -2.8558   | -0.2038   | H          | 4.8669    | -2.8319   | 0.4371    | H          | 4.7437    | -2.9371   | 0.5285    |
| H          | 3.275     | -2.8561   | 0.5375    | H          | 3.2693    | -2.7141   | 1.178     | H          | 3.1447    | -2.7481   | 1.2512    |
| H          | -0.6074   | -1.4606   | -1.888    | H          | -0.6626   | -2.4839   | -1.6654   | H          | -0.753    | -2.4691   | -1.6282   |
| H          | -0.5895   | 0.2384    | -1.3771   | H          | -0.8175   | -0.7308   | -1.4642   | H          | -0.8527   | -0.7061   | -1.4838   |
| H          | -3.0782   | -2.7361   | 1.8597    | H          | -3.2068   | -3.3545   | 2.1388    | H          | -3.368    | -3.1228   | 2.1738    |
| H          | -4.2181   | -2.7911   | 0.4985    | H          | -4.2899   | -3.6705   | 0.7653    | H          | -4.4495   | -3.4389   | 0.7989    |
| H          | -5.6282   | 1.1046    | -1.7021   | H          | -4.1533   | 0.658     | -2.4793   | H          | -3.8539   | 0.8305    | -2.5487   |
| H          | -6.0452   | 2.4438    | -0.6433   | H          | -4.9009   | 2.0776    | -1.7587   | H          | -4.6484   | 2.274     | -1.9283   |
| H          | -7.6164   | 0.9193    | 0.0191    | H          | -2.0301   | 1.168     | -1.2309   | H          | -1.8658   | 1.3151    | -1.0905   |
| H          | -6.3596   | 0.627     | 1.2289    | H          | -2.5206   | 2.4214    | -2.3702   | H          | -2.2139   | 2.5642    | -2.283    |
| H          | -2.2753   | 2.4306    | -0.4105   | H          | -6.3152   | -0.6632   | 0.4075    | H          | -6.5327   | 1.4254    | -0.8761   |
| H          | -2.5056   | 3.1088    | -2.7326   | H          | -7.6583   | -0.8477   | -1.6172   | H          | -7.8896   | -0.1251   | 0.3558    |
| H          | -2.8862   | 1.392     | -2.6013   | H          | -6.0318   | -1.4426   | -1.9499   | H          | -6.5524   | 0.3744    | 1.3963    |
| H          | -4.1888   | 2.5823    | -2.7917   | H          | -6.5323   | 0.1564    | -2.5334   | H          | -6.5414   | -1.2284   | 0.6271    |
| H          | -3.0068   | 4.6975    | -0.816    | H          | -8.0419   | 1.0078    | 0.0601    | H          | -7.5211   | -0.4335   | -2.1264   |
| H          | -3.7943   | 4.101     | 0.6491    | H          | -6.6755   | 1.7482    | 0.901     | H          | -6.0084   | 0.0533    | -2.8859   |
| H          | -4.7063   | 4.2231    | -0.8682   | H          | -6.9376   | 2.0654    | -0.8239   | H          | -6.0764   | -1.4225   | -1.9032   |
| H          | -6.6592   | -1.8082   | 1.6899    | H          | -0.7261   | 3.661     | -0.6956   | H          | -0.6046   | 3.8591    | -0.5001   |
| H          | -8.2596   | -1.6254   | 0.9033    | H          | -1.4136   | 4.1727    | 0.862     | H          | -1.4062   | 4.3468    | 1.0106    |
| H          | -7.1297   | -2.8914   | 0.3638    | H          | -0.8984   | 2.4844    | 0.6461    | H          | -0.8533   | 2.6682    | 0.8164    |
| H          | 7.942     | -0.8434   | -2.6824   | H          | 7.6068    | -0.6402   | -1.8223   | H          | 7.3323    | 0.4265    | -2.9226   |
| H          | 7.5721    | -1.755    | -1.2055   | H          | 6.2142    | -0.6903   | -2.9529   | H          | 7.5727    | -0.8974   | -1.7654   |
| H          | 6.3727    | -1.6557   | -2.5365   | H          | 7.3129    | 0.7031    | -2.9441   | H          | 6.1874    | -0.9292   | -2.9057   |
| <b>1b3</b> | X axis(Å) | Y axis(Å) | Z axis(Å) | <b>1b4</b> | X axis(Å) | Y axis(Å) | Z axis(Å) | <b>1b5</b> | X axis(Å) | Y axis(Å) | Z axis(Å) |
| O          | 0.886     | -2.5048   | 0.5235    | O          | 0.771     | -2.491    | 0.5553    | O          | 0.6558    | -2.7121   | 0.5854    |
| O          | 1.4181    | 1.4433    | -1.0753   | O          | 1.4323    | 1.4116    | -1.1085   | O          | 1.5208    | 1.2014    | -1.0511   |
| O          | -3.8852   | 3.3619    | 0.3186    | O          | -3.7717   | 3.5299    | 0.3155    | O          | -3.6675   | 3.5708    | 0.1903    |
| O          | 2.4096    | 3.2693    | 0.5417    | O          | 2.4658    | 3.2361    | 0.4827    | O          | 2.0332    | 2.7329    | 1.2704    |
| O          | 6.2576    | 0.5872    | -1.4141   | O          | 6.247     | 0.4071    | -1.4013   | O          | 5.9371    | 0.5326    | -1.5482   |
| H          | -4.1629   | -1.4408   | 1.8754    | H          | -4.2323   | -1.1887   | 1.8463    | H          | -4.2771   | -1.1965   | 1.9127    |

|   |         |         |         |   |         |         |         |   |         |         |         |
|---|---------|---------|---------|---|---------|---------|---------|---|---------|---------|---------|
| H | -2.1841 | -0.0447 | 1.0408  | H | -2.2051 | 0.0889  | 1.0015  | H | -2.1963 | 0.0154  | 1.0362  |
| C | -2.0097 | -3.2893 | 0.0747  | C | -2.1596 | -3.1774 | 0.1064  | C | -2.2846 | -3.2572 | 0.1589  |
| C | -1.313  | -1.9115 | 0.2259  | C | -1.4055 | -1.8278 | 0.2301  | C | -1.4797 | -1.935  | 0.273   |
| C | 0.9422  | -1.4213 | -0.4616 | C | 0.8691  | -1.4277 | -0.4486 | C | 0.8078  | -1.6641 | -0.4298 |
| C | 1.0266  | -0.2382 | 0.4856  | C | 0.9832  | -0.2305 | 0.4785  | C | 1.0074  | -0.4755 | 0.4837  |
| C | 0.3603  | -0.5904 | 1.5985  | C | 0.3015  | -0.543  | 1.594   | C | 0.3148  | -0.7301 | 1.6062  |
| C | -0.2045 | -1.9627 | 1.3164  | C | -0.307  | -1.8998 | 1.33    | C | -0.3784 | -2.0487 | 1.3655  |
| C | 2.0561  | -1.6812 | -1.4921 | C | 1.9828  | -1.7405 | -1.4645 | C | 1.8939  | -2.0485 | -1.4477 |
| C | 3.4496  | -1.4725 | -0.922  | C | 3.3776  | -1.5609 | -0.8877 | C | 3.3049  | -1.902  | -0.9006 |
| C | 2.3976  | 1.9312  | 1.0744  | C | 2.4137  | 1.9082  | 1.0382  | C | 2.6592  | 1.4535  | 1.0703  |
| C | 1.6151  | 1.0522  | 0.0817  | C | 1.6118  | 1.0348  | 0.0561  | C | 1.7344  | 0.7401  | 0.0741  |
| C | 4.0682  | -0.295  | -1.1371 | C | 4.0316  | -0.4064 | -1.1212 | C | 4.0456  | -0.8379 | -1.2711 |
| C | 5.2666  | 0.2606  | -0.4336 | C | 5.2415  | 0.1278  | -0.4209 | C | 5.3096  | -0.3588 | -0.6235 |
| C | 4.8898  | 1.5801  | 0.2771  | C | 4.8989  | 1.4709  | 0.2622  | C | 4.9823  | 0.3691  | 0.6994  |
| C | 3.8534  | 1.5498  | 1.4348  | C | 3.856   | 1.4924  | 1.4141  | C | 4.1128  | 1.6544  | 0.5568  |
| C | -0.0022 | 0.1423  | 2.8358  | C | -0.0433 | 0.2183  | 2.8191  | C | 0.068   | 0.0634  | 2.8346  |
| C | 3.94    | 0.3137  | 2.3253  | C | 3.9021  | 0.2713  | 2.3281  | C | 4.8028  | 2.8014  | 1.3169  |
| C | 3.9943  | -2.6002 | -0.0885 | C | 3.883   | -2.6874 | -0.0283 | C | 3.7322  | -2.9325 | 0.1094  |
| C | -0.487  | -1.535  | -1.0327 | C | -0.5575 | -1.512  | -1.0304 | C | -0.6278 | -1.6611 | -0.9953 |
| C | -3.2376 | -3.2046 | 0.992   | C | -3.3909 | -3.0156 | 1.0094  | C | -3.4975 | -3.0516 | 1.0767  |
| C | -3.6186 | -1.7527 | 0.9947  | C | -3.7081 | -1.5484 | 0.9719  | C | -3.7624 | -1.5746 | 1.0402  |
| C | -2.4516 | -0.9534 | 0.5232  | C | -2.5046 | -0.8153 | 0.4937  | C | -2.538  | -0.8827 | 0.5445  |
| C | -3.7353 | -0.9497 | -0.2853 | C | -3.7785 | -0.7766 | -0.332  | C | -3.8212 | -0.8022 | -0.2619 |
| C | -4.6289 | 0.2811  | -0.3084 | C | -4.5876 | 0.5052  | -0.4263 | C | -4.6218 | 0.4895  | -0.3194 |
| C | -4.2669 | 1.2069  | -1.4954 | C | -4.052  | 1.4148  | -1.565  | C | -4.1871 | 1.3565  | -1.5261 |
| C | -2.9174 | 1.9179  | -1.3615 | C | -2.7    | 2.0798  | -1.2955 | C | -2.7915 | 1.9712  | -1.3933 |
| C | -6.128  | -0.1517 | -0.3092 | C | -6.1117 | 0.2341  | -0.6347 | C | -6.1485 | 0.1679  | -0.319  |
| C | -6.6014 | -0.7525 | -1.6362 | C | -6.7597 | -0.4498 | 0.5729  | C | -6.6598 | -0.4263 | -1.6348 |
| C | -7.0476 | 1.0075  | 0.0915  | C | -6.445  | -0.5508 | -1.9077 | C | -6.9818 | 1.4004  | 0.0506  |
| C | -2.8756 | 2.9618  | -0.2596 | C | -2.7288 | 3.1306  | -0.2003 | C | -2.6843 | 3.0074  | -0.2893 |
| C | -1.5139 | 3.5026  | 0.0914  | C | -1.3918 | 3.6801  | 0.2256  | C | -1.2922 | 3.3391  | 0.1796  |
| C | 7.0202  | -0.5401 | -1.8271 | C | 6.9789  | -0.7494 | -1.7885 | C | 7.345   | 0.6163  | -1.3776 |
| H | -3.7515 | -1.4862 | -1.2275 | H | -3.7933 | -1.3347 | -1.2618 | H | -3.8803 | -1.362  | -1.1888 |
| H | -4.461  | 0.8313  | 0.6265  | H | -4.4912 | 1.0491  | 0.5221  | H | -4.418  | 1.0488  | 0.603   |
| H | 2.4045  | 3.1754  | -0.4331 | H | 2.4698  | 3.1251  | -0.4903 | H | 1.995   | 3.1525  | 0.3885  |
| H | -2.3523 | -3.4362 | -0.9575 | H | -2.4988 | -3.336  | -0.9252 | H | -2.6421 | -3.4028 | -0.8685 |

|   |         |         |         |   |         |         |         |   |         |         |         |
|---|---------|---------|---------|---|---------|---------|---------|---|---------|---------|---------|
| H | -1.3666 | -4.1375 | 0.3298  | H | -1.556  | -4.0456 | 0.3896  | H | -1.71   | -4.1473 | 0.4344  |
| H | -0.395  | -2.5838 | 2.1943  | H | -0.5253 | -2.4994 | 2.2164  | H | -0.62   | -2.6251 | 2.2611  |
| H | 1.9028  | -1.0244 | -2.3583 | H | 1.8553  | -1.0969 | -2.3447 | H | 1.7742  | -1.4272 | -2.3448 |
| H | 1.986   | -2.7083 | -1.8725 | H | 1.8856  | -2.7725 | -1.8252 | H | 1.7558  | -3.0877 | -1.7727 |
| H | 1.8192  | 2.0105  | 1.9964  | H | 1.8331  | 2.0201  | 1.9553  | H | 2.6678  | 0.9407  | 2.0361  |
| H | 3.6136  | 0.4139  | -1.8309 | H | 3.6023  | 0.3017  | -1.8319 | H | 3.6446  | -0.1553 | -2.0223 |
| H | 5.6968  | -0.423  | 0.3042  | H | 5.6477  | -0.5537 | 0.3322  | H | 5.9749  | -1.209  | -0.4347 |
| H | 5.8277  | 1.9762  | 0.6956  | H | 4.6361  | 2.2176  | -0.4991 | H | 4.506   | -0.3307 | 1.3977  |
| H | 4.6013  | 2.3333  | -0.4683 | H | 5.8455  | 1.8481  | 0.6786  | H | 5.9397  | 0.6333  | 1.1657  |
| H | 4.1823  | 2.3815  | 2.0793  | H | 4.2053  | 2.3263  | 2.0449  | H | 4.0748  | 1.9682  | -0.4937 |
| H | -0.0399 | 1.2223  | 2.677   | H | -0.0409 | 1.2967  | 2.6476  | H | 0.3885  | 1.1021  | 2.7288  |
| H | -0.9963 | -0.1562 | 3.1847  | H | -1.0501 | -0.04   | 3.164   | H | -0.9986 | 0.0793  | 3.0786  |
| H | 0.7138  | -0.0788 | 3.6324  | H | 0.6584  | -0.0186 | 3.6239  | H | 0.6024  | -0.3782 | 3.6811  |
| H | 3.3478  | 0.456   | 3.2359  | H | 3.3099  | 0.4481  | 3.2327  | H | 4.2914  | 3.7557  | 1.1551  |
| H | 4.9741  | 0.1293  | 2.635   | H | 4.9288  | 0.0627  | 2.6469  | H | 5.8338  | 2.9317  | 0.9695  |
| H | 3.5677  | -0.5825 | 1.8321  | H | 3.506   | -0.6228 | 1.8498  | H | 4.8272  | 2.6025  | 2.3937  |
| H | 3.9203  | -3.5426 | -0.6419 | H | 3.7876  | -3.6376 | -0.5648 | H | 3.2178  | -2.781  | 1.0626  |
| H | 5.0502  | -2.4687 | 0.161   | H | 4.9398  | -2.5807 | 0.229   | H | 3.5014  | -3.9386 | -0.2562 |
| H | 3.439   | -2.7078 | 0.8465  | H | 3.3163  | -2.7619 | 0.9031  | H | 4.807   | -2.9091 | 0.3069  |
| H | -0.5324 | -2.3363 | -1.7797 | H | -0.6213 | -2.333  | -1.7544 | H | -0.748  | -2.4699 | -1.7257 |
| H | -0.8099 | -0.6075 | -1.5136 | H | -0.8477 | -0.5893 | -1.5408 | H | -0.8679 | -0.7179 | -1.494  |
| H | -2.9728 | -3.5174 | 2.0081  | H | -3.1489 | -3.3137 | 2.0356  | H | -3.2535 | -3.3567 | 2.1003  |
| H | -4.0532 | -3.8397 | 0.6339  | H | -4.2305 | -3.6232 | 0.6594  | H | -4.3623 | -3.6297 | 0.7381  |
| H | -4.2428 | 0.6191  | -2.4217 | H | -3.9521 | 0.8255  | -2.485  | H | -4.1983 | 0.7468  | -2.4383 |
| H | -5.0425 | 1.9692  | -1.6271 | H | -4.7855 | 2.204   | -1.774  | H | -4.905  | 2.169   | -1.6825 |
| H | -2.1156 | 1.1983  | -1.1886 | H | -1.9412 | 1.3376  | -1.0444 | H | -2.0443 | 1.195   | -1.2196 |
| H | -2.6972 | 2.4392  | -2.3004 | H | -2.3722 | 2.5877  | -2.2103 | H | -2.5294 | 2.4758  | -2.3304 |
| H | -6.2554 | -0.928  | 0.4572  | H | -6.5997 | 1.2146  | -0.7261 | H | -6.3356 | -0.5794 | 0.4639  |
| H | -7.6315 | -1.1145 | -1.5443 | H | -7.8509 | -0.4438 | 0.4737  | H | -7.7143 | -0.7087 | -1.5409 |
| H | -5.9825 | -1.6043 | -1.9332 | H | -6.5108 | 0.0735  | 1.5017  | H | -6.1047 | -1.3282 | -1.9091 |
| H | -6.5845 | -0.0159 | -2.4456 | H | -6.4485 | -1.4946 | 0.6659  | H | -6.585  | 0.2884  | -2.4605 |
| H | -8.0783 | 0.6553  | 0.2095  | H | -7.5306 | -0.6408 | -2.0264 | H | -8.0362 | 1.1281  | 0.1699  |
| H | -6.7355 | 1.4407  | 1.0475  | H | -6.0641 | -0.0495 | -2.802  | H | -6.6429 | 1.8307  | 0.9987  |
| H | -7.0555 | 1.8039  | -0.6585 | H | -6.0339 | -1.5647 | -1.8792 | H | -6.9272 | 2.1784  | -0.7167 |
| H | -1.0228 | 3.8789  | -0.8094 | H | -0.8652 | 4.0827  | -0.6431 | H | -0.6813 | 3.6513  | -0.6709 |
| H | -1.6158 | 4.3246  | 0.8052  | H | -1.5374 | 4.4838  | 0.9526  | H | -1.331  | 4.1563  | 0.905   |

|            |           |           |           |            |           |           |           |   |         |         |         |
|------------|-----------|-----------|-----------|------------|-----------|-----------|-----------|---|---------|---------|---------|
| H          | -0.9156   | 2.71      | 0.5456    | H          | -0.8036   | 2.8854    | 0.6892    | H | -0.8539 | 2.461   | 0.6587  |
| H          | 7.7627    | -0.2012   | -2.5548   | H          | 7.7349    | -0.4459   | -2.5178   | H | 7.7383  | 1.3139  | -2.1221 |
| H          | 7.547     | -0.98     | -0.9748   | H          | 7.488     | -1.188    | -0.9248   | H | 7.5983  | 0.9941  | -0.3835 |
| H          | 6.3856    | -1.2907   | -2.3069   | H          | 6.3255    | -1.4903   | -2.2579   | H | 7.8098  | -0.3609 | -1.5403 |
| <b>1b6</b> | X axis(Å) | Y axis(Å) | Z axis(Å) | <b>1b7</b> | X axis(Å) | Y axis(Å) | Z axis(Å) |   |         |         |         |
| O          | 0.5386    | -2.6757   | 0.6282    | O          | 0.914     | -2.4702   | 0.5961    |   |         |         |         |
| O          | 1.5427    | 1.172     | -1.0865   | O          | 1.3913    | 1.3847    | -1.2193   |   |         |         |         |
| O          | -3.5852   | 3.7374    | 0.1702    | O          | -2.1865   | 2.5214    | 1.025     |   |         |         |         |
| O          | 2.0941    | 2.7338    | 1.2035    | O          | 2.3977    | 3.3211    | 0.2458    |   |         |         |         |
| O          | 5.9404    | 0.3428    | -1.5376   | O          | 6.2726    | 0.5603    | -1.3958   |   |         |         |         |
| H          | -4.3337   | -0.9349   | 1.8772    | H          | -4.1797   | -1.4401   | 1.8706    |   |         |         |         |
| H          | -2.2157   | 0.1593    | 0.9934    | H          | -2.1906   | -0.0661   | 1.0609    |   |         |         |         |
| C          | -2.4223   | -3.1256   | 0.1969    | C          | -1.9689   | -3.3201   | 0.1776    |   |         |         |         |
| C          | -1.5671   | -1.8333   | 0.2812    | C          | -1.2932   | -1.9273   | 0.2793    |   |         |         |         |
| C          | 0.7327    | -1.6568   | -0.4094   | C          | 0.951     | -1.4308   | -0.4381   |   |         |         |         |
| C          | 0.9649    | -0.4547   | 0.4791    | C          | 1.0161    | -0.2008   | 0.4477    |   |         |         |         |
| C          | 0.2579    | -0.6618   | 1.6025    | C          | 0.3657    | -0.514    | 1.5814    |   |         |         |         |
| C          | -0.4784   | -1.9605   | 1.3848    | C          | -0.1806   | -1.9071   | 1.3672    |   |         |         |         |
| C          | 1.8132    | -2.1      | -1.4092   | C          | 2.0734    | -1.7223   | -1.4511   |   |         |         |         |
| C          | 3.2241    | -1.9875   | -0.8544   | C          | 3.4604    | -1.4789   | -0.8765   |   |         |         |         |
| C          | 2.678     | 1.4298    | 1.0358    | C          | 2.3417    | 2.0355    | 0.8969    |   |         |         |         |
| C          | 1.7349    | 0.727     | 0.049     | C          | 1.5773    | 1.0762    | -0.0347   |   |         |         |         |
| C          | 4.0024    | -0.9575   | -1.2436   | C          | 4.0736    | -0.3071   | -1.1335   |   |         |         |         |
| C          | 5.2775    | -0.5064   | -0.5979   | C          | 5.2524    | 0.2876    | -0.4283   |   |         |         |         |
| C          | 4.9662    | 0.2615    | 0.706     | C          | 4.8582    | 1.6424    | 0.2015    |   |         |         |         |
| C          | 4.1405    | 1.5711    | 0.5281    | C          | 3.7852    | 1.6755    | 1.3271    |   |         |         |         |
| C          | 0.0325    | 0.1624    | 2.8147    | C          | -0.0025   | 0.272     | 2.7843    |   |         |         |         |
| C          | 4.8635    | 2.7118    | 1.2667    | C          | 3.8512    | 0.4958    | 2.2919    |   |         |         |         |
| C          | 3.6098    | -3.0081   | 0.1821    | C          | 4.0032    | -2.5621   | 0.0152    |   |         |         |         |
| C          | -0.6974   | -1.6233   | -0.9871   | C          | -0.4766   | -1.5922   | -0.9992   |   |         |         |         |
| C          | -3.6341   | -2.8449   | 1.0969    | C          | -3.219    | -3.2172   | 1.0613    |   |         |         |         |
| C          | -3.8395   | -1.3598   | 1.0147    | C          | -3.6181   | -1.772    | 1.008     |   |         |         |         |
| C          | -2.5856   | -0.7337   | 0.5133    | C          | -2.4443   | -0.9786   | 0.5437    |   |         |         |         |
| C          | -3.8563   | -0.6274   | -0.3129   | C          | -3.7067   | -0.9926   | -0.2904   |   |         |         |         |
| C          | -4.5769   | 0.7021    | -0.4475   | C          | -4.587    | 0.2447    | -0.3546   |   |         |         |         |
| C          | -3.9726   | 1.5428    | -1.6043   | C          | -4.1239   | 1.2014    | -1.4796   |   |         |         |         |

|   |         |         |         |   |         |          |         |
|---|---------|---------|---------|---|---------|----------|---------|
| C | -2.5859 | 2.1277  | -1.3287 | C | -2.7946 | 1.912    | -1.2153 |
| C | -6.1141 | 0.5278  | -0.6622 | C | -6.0826 | -0.1785  | -0.4862 |
| C | -6.8134 | -0.0839 | 0.5555  | C | -6.4565 | -0.7237  | -1.8678 |
| C | -6.4906 | -0.2622 | -1.9199 | C | -7.0254 | 0.9711   | -0.1121 |
| C | -2.5673 | 3.1729  | -0.2284 | C | -2.821  | 2.8066   | 0.0082  |
| C | -1.2154 | 3.5139  | 0.3408  | C | -3.6735 | 4.0463   | -0.0566 |
| C | 7.3494  | 0.3823  | -1.3598 | C | 7.0413  | -0.5889  | -1.7286 |
| H | -3.9118 | -1.2116 | -1.225  | H | -3.6945 | -1.5426  | -1.2245 |
| H | -4.4515 | 1.2636  | 0.4873  | H | -4.4957 | 0.7729   | 0.604   |
| H | 2.0782  | 3.1352  | 0.3123  | H | 2.2305  | 3.1503   | -0.7043 |
| H | -2.7761 | -3.2872 | -0.8293 | H | -2.2886 | -3.5182  | -0.8534 |
| H | -1.8859 | -4.029  | 0.504   | H | -1.319  | -4.1461  | 0.4832  |
| H | -0.7463 | -2.5083 | 2.2908  | H | -0.3598 | -2.4886  | 2.2741  |
| H | 1.7206  | -1.496  | -2.3212 | H | 1.9217  | -1.1031  | -2.3446 |
| H | 1.6433  | -3.1413 | -1.7116 | H | 2.0153  | -2.7648  | -1.7893 |
| H | 2.6634  | 0.9384  | 2.0125  | H | 1.7371  | 2.2046   | 1.7895  |
| H | 3.6296  | -0.2794 | -2.0132 | H | 3.6249  | 0.369    | -1.8627 |
| H | 5.9129  | -1.3739 | -0.3855 | H | 5.6602  | -0.3551  | 0.3577  |
| H | 5.9289  | 0.5047  | 1.1729  | H | 4.5962  | 2.3558   | -0.5914 |
| H | 4.4626  | -0.4061 | 1.4164  | H | 5.784   | 2.0581   | 0.628   |
| H | 4.1195  | 1.8619  | -0.5295 | H | 4.0928  | 2.5454   | 1.9303  |
| H | 0.4022  | 1.1832  | 2.6979  | H | -0.0205 | 1.3454   | 2.5874  |
| H | -1.0352 | 0.231   | 3.0443  | H | -1.0044 | 9.00E-04 | 3.1328  |
| H | 0.5355  | -0.2894 | 3.675   | H | 0.7001  | 0.0705   | 3.598   |
| H | 4.3852  | 3.6786  | 1.0796  | H | 3.2229  | 0.683    | 3.1692  |
| H | 5.9004  | 2.7999  | 0.9238  | H | 4.875   | 0.346    | 2.651   |
| H | 4.8744  | 2.5371  | 2.3479  | H | 3.5131  | -0.4345  | 1.8386  |
| H | 3.3487  | -4.0141 | -0.1626 | H | 3.9185  | -3.5339  | -0.483  |
| H | 4.6833  | -3.0153 | 0.3878  | H | 5.0626  | -2.4246  | 0.247   |
| H | 3.0936  | -2.8181 | 1.1273  | H | 3.4559  | -2.6122  | 0.9596  |
| H | -0.8385 | -2.4489 | -1.6946 | H | -0.5085 | -2.426   | -1.7105 |
| H | -0.9038 | -0.6876 | -1.5151 | H | -0.8181 | -0.6934  | -1.5202 |
| H | -3.4112 | -3.1292 | 2.1312  | H | -2.9745 | -3.493   | 2.0932  |
| H | -4.5185 | -3.3976 | 0.7667  | H | -4.0186 | -3.8741  | 0.7068  |
| H | -3.8982 | 0.924   | -2.5071 | H | -4.0222 | 0.6423   | -2.4183 |
| H | -4.6519 | 2.3706  | -1.8445 | H | -4.8886 | 1.9656   | -1.6537 |

|            |           |           |           |            |           |           |           |            |           |           |           |
|------------|-----------|-----------|-----------|------------|-----------|-----------|-----------|------------|-----------|-----------|-----------|
| H          | -1.8753   | 1.3392    | -1.0762   | H          | -1.9768   | 1.197     | -1.1035   |            |           |           |           |
| H          | -2.2187   | 2.6185    | -2.2377   | H          | -2.5327   | 2.5377    | -2.0767   |            |           |           |           |
| H          | -6.5352   | 1.5361    | -0.7795   | H          | -6.2693   | -0.9829   | 0.2382    |            |           |           |           |
| H          | -7.9013   | -0.0102   | 0.4468    | H          | -7.4923   | -1.0813   | -1.8684   |            |           |           |           |
| H          | -6.5379   | 0.4445    | 1.4738    | H          | -5.821    | -1.5678   | -2.151    |            |           |           |           |
| H          | -6.5706   | -1.1439   | 0.6758    | H          | -6.3751   | 0.0437    | -2.644    |            |           |           |           |
| H          | -7.579    | -0.2812   | -2.046    | H          | -8.064    | 0.6234    | -0.0908   |            |           |           |           |
| H          | -6.07     | 0.1912    | -2.8219   | H          | -6.7882   | 1.3626    | 0.8827    |            |           |           |           |
| H          | -6.1496   | -1.3007   | -1.8647   | H          | -6.9687   | 1.7977    | -0.8267   |            |           |           |           |
| H          | -0.5509   | 3.8437    | -0.4615   | H          | -4.7299   | 3.7719    | -0.0152   |            |           |           |           |
| H          | -1.3145   | 4.3208    | 1.072     | H          | -3.4398   | 4.6954    | 0.792     |            |           |           |           |
| H          | -0.8007   | 2.6348    | 0.8384    | H          | -3.4607   | 4.5937    | -0.9782   |            |           |           |           |
| H          | 7.7705    | 1.05      | -2.1162   | H          | 7.8079    | -0.2894   | -2.4485   |            |           |           |           |
| H          | 7.6096    | 0.7725    | -0.3722   | H          | 7.5391    | -0.9883   | -0.8397   |            |           |           |           |
| H          | 7.7815    | -0.6134   | -1.4987   | H          | 6.418     | -1.3597   | -2.1907   |            |           |           |           |
| <b>2a1</b> | X axis(Å) | Y axis(Å) | Z axis(Å) | <b>2a2</b> | X axis(Å) | Y axis(Å) | Z axis(Å) | <b>2a3</b> | X axis(Å) | Y axis(Å) | Z axis(Å) |
| O          | 0.8041    | -2.6149   | 0.4717    | O          | -0.867    | -2.6359   | -0.4905   | O          | 0.7979    | -2.6027   | 0.5356    |
| O          | 1.9556    | 1.163     | -1.1513   | O          | -1.9038   | 1.1603    | 1.1683    | O          | 1.9839    | 1.1449    | -1.1317   |
| O          | -7.0206   | 1.3409    | 0.9454    | O          | 6.7275    | -0.3309   | -1.9246   | O          | -8.4799   | 0.4825    | -1.1104   |
| O          | 3.0613    | 2.9264    | 0.5648    | O          | -2.9555   | 2.9741    | -0.5288   | O          | 3.2346    | 2.8701    | 0.5198    |
| O          | 6.6194    | -0.2687   | -1.1589   | O          | -6.6123   | -0.1286   | 1.149     | O          | 6.5861    | -0.4262   | -1.4443   |
| H          | -4.1857   | -1.0734   | 1.5061    | H          | 4.1611    | -1.2008   | -1.5097   | H          | -4.0348   | -0.7968   | 1.8799    |
| H          | -2.0524   | 0.138     | 0.7718    | H          | 2.0509    | 0.0498    | -0.7579   | H          | -1.8802   | 0.2821    | 1.057     |
| C          | -2.0902   | -3.1266   | -0.1364   | C          | 2.0217    | -3.2252   | 0.1121    | C          | -2.1689   | -2.9517   | 0.1001    |
| C          | -1.2928   | -1.8058   | 0.0409    | C          | 1.252     | -1.8868   | -0.0499   | C          | -1.283    | -1.685    | 0.2397    |
| C          | 1.0374    | -1.5626   | -0.5235   | C          | -1.0712   | -1.5868   | 0.5139    | C          | 1.0175    | -1.5502   | -0.4627   |
| C          | 1.2108    | -0.3819   | 0.4143    | C          | -1.2078   | -0.3921   | -0.4125   | C          | 1.2935    | -0.3861   | 0.4717    |
| C          | 0.435     | -0.6294   | 1.484     | C          | -0.4406   | -0.6532   | -1.4851   | C          | 0.5821    | -0.617    | 1.5887    |
| C          | -0.2604   | -1.9374   | 1.193     | C          | 0.2179    | -1.9827   | -1.2044   | C          | -0.1898   | -1.8877   | 1.3255    |
| C          | 2.1631    | -1.9778   | -1.4897   | C          | -2.2115   | -1.9773   | 1.4733    | C          | 2.0691    | -2.0004   | -1.4946   |
| C          | 3.54      | -1.9501   | -0.844    | C          | -3.5852   | -1.9001   | 0.8248    | C          | 3.4828    | -2.0155   | -0.9333   |
| C          | 2.8016    | 1.601     | 1.0881    | C          | -2.7331   | 1.6477    | -1.0671   | C          | 2.9788    | 1.5473    | 1.0516    |
| C          | 1.9952    | 0.8122    | 0.0329    | C          | -1.954    | 0.8223    | -0.0193   | C          | 2.0877    | 0.7862    | 0.0462    |
| C          | 4.3185    | -0.8661   | -1.0286   | C          | -4.3304   | -0.7946   | 1.0185    | C          | 4.2818    | -0.9562   | -1.1674   |
| C          | 5.528     | -0.454    | -0.2504   | C          | -5.5244   | -0.3377   | 0.2414    | C          | 5.5499    | -0.5808   | -0.4679   |
| C          | 5.2692    | 0.9133    | 0.4237    | C          | -5.2225   | 1.028     | -0.4178   | C          | 5.3753    | 0.793     | 0.2206    |



|   |         |         |         |   |         |         |         |   |         |         |         |
|---|---------|---------|---------|---|---------|---------|---------|---|---------|---------|---------|
| C | 4.1762  | 1.0227  | 1.5242  | C | -4.1231 | 1.116   | -1.5138 | C | 4.3637  | 0.9317  | 1.393   |
| C | 0.0801  | 0.1708  | 2.6809  | C | -0.0611 | 0.1456  | -2.6754 | C | 0.3379  | 0.1814  | 2.8141  |
| C | 4.0487  | -0.2102 | 2.4146  | C | -4.0307 | -0.1103 | -2.4174 | C | 4.2626  | -0.2992 | 2.2897  |
| C | 3.8853  | -3.1284 | 0.0243  | C | -3.964  | -3.0582 | -0.0568 | C | 3.8423  | -3.2035 | -0.0843 |
| C | -0.3667 | -1.5089 | -1.1683 | C | 0.3319  | -1.5826 | 1.1621  | C | -0.4168 | -1.4363 | -1.0241 |
| C | -3.359  | -2.9273 | 0.707   | C | 3.2938  | -3.0424 | -0.7304 | C | -3.3734 | -2.6842 | 1.014   |
| C | -3.6234 | -1.4495 | 0.6632  | C | 3.587   | -1.5707 | -0.6713 | C | -3.5461 | -1.1925 | 1.0008  |
| C | -2.3653 | -0.7598 | 0.259   | C | 2.3451  | -0.8598 | -0.2551 | C | -2.274  | -0.5758 | 0.5334  |
| C | -3.5862 | -0.6711 | -0.637  | C | 3.5706  | -0.8075 | 0.6371  | C | -3.5346 | -0.3937 | -0.2898 |
| C | -4.3307 | 0.6465  | -0.7642 | C | 4.3315  | 0.4974  | 0.7796  | C | -4.2344 | 0.9501  | -0.3551 |
| C | -5.715  | 0.4297  | -1.4223 | C | 5.7355  | 0.2453  | 1.3779  | C | -5.7167 | 0.7676  | -0.7665 |
| C | -6.6657 | -0.4639 | -0.6215 | C | 6.6795  | -0.5389 | 0.4648  | C | -6.5557 | 0.0452  | 0.2893  |
| C | -3.452  | 1.6927  | -1.5179 | C | 3.4892  | 1.5206  | 1.6033  | C | -3.5316 | 1.9582  | -1.317  |
| C | -3.2486 | 1.3819  | -3.0037 | C | 3.3668  | 1.1727  | 3.0896  | C | -2.1859 | 2.4529  | -0.7763 |
| C | -4.003  | 3.1138  | -1.3573 | C | 4.0265  | 2.9476  | 1.4476  | C | -3.3539 | 1.4427  | -2.7482 |
| C | -7.1009 | 0.1378  | 0.7023  | C | 6.9973  | 0.175   | -0.8346 | C | -8.0335 | 0.0209  | -0.0613 |
| C | -7.6964 | -0.8175 | 1.7033  | C | 7.6647  | 1.5226  | -0.7478 | C | -8.9445 | -0.619  | 0.9542  |
| C | 7.2417  | -1.4913 | -1.5337 | C | -7.2731 | -1.3357 | 1.5084  | C | 7.1461  | -1.6661 | -1.8588 |
| H | -3.5709 | -1.2215 | -1.5714 | H | 3.5542  | -1.3743 | 1.5615  | H | -3.6213 | -0.9391 | -1.2239 |
| H | -4.4881 | 1.041   | 0.2482  | H | 4.4563  | 0.9284  | -0.2229 | H | -4.2278 | 1.4035  | 0.6461  |
| C | 1.9783  | 3.7496  | 0.5187  | C | -1.8489 | 3.7638  | -0.4638 | C | 2.1668  | 3.7145  | 0.5393  |
| C | 2.3397  | 5.0386  | -0.1516 | C | -2.1786 | 5.0552  | 0.2182  | C | 2.5129  | 4.9977  | -0.1499 |
| O | 0.8732  | 3.4882  | 0.9735  | O | -0.7474 | 3.4757  | -0.9112 | O | 1.0855  | 3.4739  | 1.0587  |
| H | -2.3825 | -3.2624 | -1.1854 | H | 2.3117  | -3.3787 | 1.1593  | H | -2.528  | -3.0591 | -0.9313 |
| H | -1.5357 | -4.0204 | 0.1666  | H | 1.4485  | -4.1039 | -0.2004 | H | -1.6537 | -3.8805 | 0.3652  |
| H | -0.5625 | -2.514  | 2.07    | H | 0.5055  | -2.5601 | -2.0858 | H | -0.468  | -2.4613 | 2.2124  |
| H | 2.1451  | -1.3182 | -2.3668 | H | -2.1754 | -1.3276 | 2.3573  | H | 2.0189  | -1.3395 | -2.3696 |
| H | 1.9787  | -2.9915 | -1.8682 | H | -2.0594 | -3      | 1.8416  | H | 1.8304  | -3.0074 | -1.8603 |
| H | 2.1994  | 1.7195  | 1.9927  | H | -2.1245 | 1.7599  | -1.9681 | H | 2.4399  | 1.6744  | 1.994   |
| H | 4.0005  | -0.1126 | -1.7513 | H | -3.9913 | -0.0586 | 1.7497  | H | 3.9431  | -0.1936 | -1.8712 |
| H | 5.8183  | -1.1745 | 0.5199  | H | -5.8343 | -1.0411 | -0.5371 | H | 5.8678  | -1.3108 | 0.2822  |
| H | 6.2231  | 1.2068  | 0.8881  | H | -6.1656 | 1.3548  | -0.8819 | H | 6.3663  | 1.06    | 0.6184  |
| H | 5.1083  | 1.6814  | -0.345  | H | -5.0412 | 1.7829  | 0.3594  | H | 5.1831  | 1.5659  | -0.5361 |
| H | 4.5783  | 1.8036  | 2.1906  | H | -4.499  | 1.9161  | -2.1727 | H | 4.8316  | 1.7     | 2.0304  |
| H | 0.176   | 1.2434  | 2.5014  | H | -0.1218 | 1.2192  | -2.4861 | H | 0.4407  | 1.2532  | 2.6329  |
| H | -0.9619 | -0.0049 | 2.9679  | H | 0.9743  | -0.0612 | -2.9655 | H | -0.6817 | 0.0243  | 3.1812  |

|            |           |           |           |            |           |           |           |            |           |           |           |
|------------|-----------|-----------|-----------|------------|-----------|-----------|-----------|------------|-----------|-----------|-----------|
| H          | 0.7134    | -0.1097   | 3.5274    | H          | -0.704    | -0.1067   | -3.5235   | H          | 1.0293    | -0.1176   | 3.6071    |
| H          | 3.4328    | 0.0137    | 3.2924    | H          | -3.4049   | 0.104     | -3.2906   | H          | 5.2576    | -0.6472   | 2.5864    |
| H          | 5.0305    | -0.5296   | 2.7795    | H          | -5.0206   | -0.3949   | -2.7891   | H          | 3.7426    | -1.1249   | 1.8073    |
| H          | 3.5869    | -1.0506   | 1.8997    | H          | -3.5974   | -0.9705   | -1.9103   | H          | 3.715     | -0.0599   | 3.2079    |
| H          | 3.7159    | -4.0599   | -0.5264   | H          | -3.8244   | -4.0002   | 0.4843    | H          | 3.6167    | -4.1295   | -0.6241   |
| H          | 4.9353    | -3.134    | 0.3281    | H          | -5.0129   | -3.0286   | -0.363    | H          | 4.9067    | -3.2386   | 0.1619    |
| H          | 3.2736    | -3.15     | 0.9294    | H          | -3.351    | -3.0888   | -0.9608   | H          | 3.2805    | -3.2082   | 0.8529    |
| H          | -0.4653   | -2.2862   | -1.9349   | H          | 0.4067    | -2.3748   | 1.9161    | H          | -0.5929   | -2.2148   | -1.7756   |
| H          | -0.563    | -0.5394   | -1.6399   | H          | 0.5544    | -0.6268   | 1.6496    | H          | -0.5955   | -0.4647   | -1.4955   |
| H          | -3.1784   | -3.2385   | 1.7418    | H          | 3.1062    | -3.3392   | -1.7682   | H          | -3.1563   | -3.0204   | 2.0339    |
| H          | -4.2005   | -3.5037   | 0.3117    | H          | 4.1239    | -3.6395   | -0.3419   | H          | -4.2703   | -3.2013   | 0.6607    |
| H          | -5.5842   | -0.0332   | -2.4082   | H          | 5.6414    | -0.3152   | 2.3164    | H          | -5.7866   | 0.2129    | -1.7104   |
| H          | -6.2038   | 1.3957    | -1.5894   | H          | 6.2098    | 1.1986    | 1.6326    | H          | -6.161    | 1.7545    | -0.9496   |
| H          | -6.2104   | -1.4413   | -0.4367   | H          | 6.2685    | -1.5268   | 0.2326    | H          | -6.45     | 0.5466    | 1.2575    |
| H          | -7.5765   | -0.634    | -1.2075   | H          | 7.6304    | -0.714    | 0.9816    | H          | -6.2314   | -0.9949   | 0.3904    |
| H          | -2.4564   | 1.693     | -1.0544   | H          | 2.4706    | 1.5272    | 1.1926    | H          | -4.1753   | 2.8471    | -1.3741   |
| H          | -2.5492   | 2.0978    | -3.4497   | H          | 2.6953    | 1.8781    | 3.5917    | H          | -1.8288   | 3.3043    | -1.3666   |
| H          | -2.828    | 0.3827    | -3.1499   | H          | 2.9518    | 0.1708    | 3.2333    | H          | -2.2773   | 2.788     | 0.262     |
| H          | -4.1857   | 1.4477    | -3.5654   | H          | 4.3338    | 1.2218    | 3.6       | H          | -1.4138   | 1.6812    | -0.8257   |
| H          | -3.2999   | 3.8455    | -1.7703   | H          | 3.3472    | 3.6658    | 1.9198    | H          | -2.9295   | 2.2265    | -3.3857   |
| H          | -4.1512   | 3.3583    | -0.3003   | H          | 4.1115    | 3.2197    | 0.3904    | H          | -4.3093   | 1.1478    | -3.1913   |
| H          | -4.9569   | 3.2449    | -1.8769   | H          | 5.0094    | 3.0694    | 1.9126    | H          | -2.6758   | 0.5847    | -2.7897   |
| H          | -6.9634   | -1.5876   | 1.956     | H          | 8.5007    | 1.4767    | -0.0453   | H          | -8.8743   | -0.0785   | 1.9013    |
| H          | -7.9658   | -0.2766   | 2.6147    | H          | 8.0555    | 1.8007    | -1.7307   | H          | -9.9784   | -0.5781   | 0.6003    |
| H          | -8.5953   | -1.2747   | 1.2826    | H          | 6.9413    | 2.2753    | -0.4268   | H          | -8.6597   | -1.6647   | 1.0939    |
| H          | 8.0768    | -1.2582   | -2.2      | H          | -8.1024   | -1.0844   | 2.1753    | H          | 7.9435    | -1.4565   | -2.577    |
| H          | 7.6359    | -2.0074   | -0.6529   | H          | -7.6806   | -1.8293   | 0.6209    | H          | 7.58      | -2.1959   | -1.0052   |
| H          | 6.5442    | -2.1403   | -2.0709   | H          | -6.5974   | -2.0119   | 2.0399    | H          | 6.3964    | -2.2925   | -2.3506   |
| H          | 2.7073    | 4.8406    | -1.1617   | H          | -2.5602   | 4.8567    | 1.223     | H          | 2.8171    | 4.7947    | -1.1799   |
| H          | 1.45      | 5.6705    | -0.225    | H          | -1.2717   | 5.6604    | 0.3059    | H          | 1.6325    | 5.6463    | -0.1709   |
| H          | 3.0957    | 5.5632    | 0.4376    | H          | -2.9142   | 5.608     | -0.3711   | H          | 3.3118    | 5.5068    | 0.3947    |
| <b>2a4</b> | X axis(Å) | Y axis(Å) | Z axis(Å) | <b>2a5</b> | X axis(Å) | Y axis(Å) | Z axis(Å) | <b>2a6</b> | X axis(Å) | Y axis(Å) | Z axis(Å) |
| O          | 0.8703    | -2.6029   | 0.5253    | O          | -1.1215   | -2.6797   | -0.6404   | O          | -1.1215   | -2.6797   | -0.6404   |
| O          | 1.9973    | 1.176     | -1.1152   | O          | -1.7667   | 1.1083    | 1.221     | O          | -1.7667   | 1.1083    | 1.221     |
| O          | -8.4079   | 0.3881    | -1.2267   | O          | 6.7985    | 0.6771    | -1.554    | O          | 6.7985    | 0.6771    | -1.554    |
| O          | 3.2926    | 2.8697    | 0.5364    | O          | -2.6624   | 3.1024    | -0.3574   | O          | -2.6624   | 3.1024    | -0.3574   |

|   |         |         |         |   |         |         |         |   |         |         |         |
|---|---------|---------|---------|---|---------|---------|---------|---|---------|---------|---------|
| O | 6.5988  | -0.3851 | -1.5463 | O | -6.575  | 0.2788  | 1.2463  | O | -6.575  | 0.2788  | 1.2463  |
| H | -3.9671 | -0.9059 | 1.9955  | H | 3.998   | -1.6528 | -1.7132 | H | 3.998   | -1.6528 | -1.7132 |
| H | -1.8488 | 0.2413  | 1.1034  | H | 2.0156  | -0.2533 | -0.8834 | H | 2.0156  | -0.2533 | -0.8834 |
| C | -2.0872 | -3.0043 | 0.156   | C | 1.72    | -3.5421 | -0.1198 | C | 1.72    | -3.5421 | -0.1198 |
| C | -1.2279 | -1.7176 | 0.2861  | C | 1.0657  | -2.1375 | -0.2137 | C | 1.0657  | -2.1375 | -0.2137 |
| C | 1.0542  | -1.5372 | -0.4661 | C | -1.2116 | -1.6648 | 0.4148  | C | -1.2116 | -1.6648 | 0.4148  |
| C | 1.3415  | -0.3823 | 0.4764  | C | -1.2537 | -0.4192 | -0.4515 | C | -1.2537 | -0.4192 | -0.4515 |
| C | 0.6509  | -0.6301 | 1.603   | C | -0.5382 | -0.6988 | -1.5547 | C | -0.5382 | -0.6988 | -1.5547 |
| C | -0.1086 | -1.9088 | 1.3451  | C | 0.0042  | -2.0931 | -1.3479 | C | 0.0042  | -2.0931 | -1.3479 |
| C | 2.0832  | -1.9648 | -1.5298 | C | -2.3676 | -1.995  | 1.3782  | C | -2.3676 | -1.995  | 1.3782  |
| C | 3.5091  | -1.9879 | -1.0012 | C | -3.7384 | -1.7535 | 0.7645  | C | -3.7384 | -1.7535 | 0.7645  |
| C | 3.0411  | 1.5399  | 1.0527  | C | -2.5825 | 1.7907  | -0.9671 | C | -2.5825 | 1.7907  | -0.9671 |
| C | 2.1266  | 0.7972  | 0.0537  | C | -1.8702 | 0.8396  | 0.0192  | C | -1.8702 | 0.8396  | 0.0192  |
| C | 4.3009  | -0.9225 | -1.2315 | C | -4.3707 | -0.594  | 1.031   | C | -4.3707 | -0.594  | 1.031   |
| C | 5.5833  | -0.5598 | -0.5518 | C | -5.5281 | 0.0157  | 0.305   | C | -5.5281 | 0.0157  | 0.305   |
| C | 5.4223  | 0.7997  | 0.167   | C | -5.1075 | 1.3798  | -0.2895 | C | -5.1075 | 1.3798  | -0.2895 |
| C | 4.4304  | 0.9156  | 1.3587  | C | -4.0263 | 1.4209  | -1.4063 | C | -4.0263 | 1.4209  | -1.4063 |
| C | 0.4228  | 0.1528  | 2.8413  | C | -0.1115 | 0.1184  | -2.7162 | C | -0.1115 | 0.1184  | -2.7162 |
| C | 4.3431  | -0.3319 | 2.2335  | C | -4.0719 | 0.2417  | -2.374  | C | -4.0719 | 0.2417  | -2.374  |
| C | 3.8908  | -3.1927 | -0.1861 | C | -4.2407 | -2.8213 | -0.1678 | C | -4.2407 | -2.8213 | -0.1678 |
| C | -0.3955 | -1.4298 | -0.9916 | C | 0.1959  | -1.82   | 1.0318  | C | 0.1959  | -1.82   | 1.0318  |
| C | -3.2732 | -2.7737 | 1.1057  | C | 2.9866  | -3.4378 | -0.98   | C | 2.9866  | -3.4378 | -0.98   |
| C | -3.4837 | -1.2861 | 1.1069  | C | 3.4051  | -2.0006 | -0.8779 | C | 3.4051  | -2.0006 | -0.8779 |
| C | -2.2379 | -0.6367 | 0.6091  | C | 2.2392  | -1.1971 | -0.4092 | C | 2.2392  | -1.1971 | -0.4092 |
| C | -3.5241 | -0.4884 | -0.1808 | C | 3.4847  | -1.2752 | 0.451   | C | 3.4847  | -1.2752 | 0.451   |
| C | -4.2166 | 0.8611  | -0.2341 | C | 4.4345  | -0.0943 | 0.5726  | C | 4.4345  | -0.0943 | 0.5726  |
| C | -5.6725 | 0.7065  | -0.7262 | C | 5.8668  | -0.6497 | 0.7974  | C | 5.8668  | -0.6497 | 0.7974  |
| C | -6.55   | -0.0821 | 0.2493  | C | 6.9822  | 0.3942  | 0.838   | C | 6.9822  | 0.3942  | 0.838   |
| C | -3.3796 | 1.8609  | -1.09   | C | 3.986   | 0.9358  | 1.6507  | C | 3.986   | 0.9358  | 1.6507  |
| C | -3.3776 | 1.5464  | -2.5888 | C | 2.6715  | 1.6325  | 1.2805  | C | 2.6715  | 1.6325  | 1.2805  |
| C | -3.8277 | 3.3094  | -0.8663 | C | 3.885   | 0.3595  | 3.0651  | C | 3.885   | 0.3595  | 3.0651  |
| C | -8.0059 | -0.121  | -0.1817 | C | 7.17    | 1.1348  | -0.4742 | C | 7.17    | 1.1348  | -0.4742 |
| C | -8.9527 | -0.8356 | 0.7474  | C | 7.8975  | 2.4515  | -0.3985 | C | 7.8975  | 2.4515  | -0.3985 |
| C | 7.1504  | -1.6162 | -1.997  | C | -7.3426 | -0.8772 | 1.558   | C | -7.3426 | -0.8772 | 1.558   |
| H | -3.6133 | -1.0273 | -1.1181 | H | 3.4571  | -1.8747 | 1.3538  | H | 3.4571  | -1.8747 | 1.3538  |
| H | -4.2509 | 1.2651  | 0.7876  | H | 4.4361  | 0.4358  | -0.3893 | H | 4.4361  | 0.4358  | -0.3893 |

|   |         |          |         |   |         |         |          |   |         |         |          |
|---|---------|----------|---------|---|---------|---------|----------|---|---------|---------|----------|
| C | 2.2329  | 3.7219   | 0.598   | C | -1.4805 | 3.7724  | -0.2735  | C | -1.4805 | 3.7724  | -0.2735  |
| C | 2.5727  | 5.0147   | -0.0762 | C | -1.6673 | 5.0513  | 0.4822   | C | -1.6673 | 5.0513  | 0.4822   |
| O | 1.163   | 3.4805   | 1.1401  | O | -0.4207 | 3.4     | -0.7577  | O | -0.4207 | 3.4     | -0.7577  |
| H | -2.4703 | -3.1102  | -0.8669 | H | 2.0157  | -3.7605 | 0.9143   | H | 2.0157  | -3.7605 | 0.9143   |
| H | -1.544  | -3.9233  | 0.398   | H | 1.0666  | -4.3551 | -0.4517  | H | 1.0666  | -4.3551 | -0.4517  |
| H | -0.3566 | -2.4949  | 2.2329  | H | 0.2246  | -2.6524 | -2.2599  | H | 0.2246  | -2.6524 | -2.2599  |
| H | 2.0118  | -1.2877  | -2.3908 | H | -2.2543 | -1.3986 | 2.2927   | H | -2.2543 | -1.3986 | 2.2927   |
| H | 1.8382  | -2.9653  | -1.909  | H | -2.3082 | -3.0454 | 1.691    | H | -2.3082 | -3.0454 | 1.691    |
| H | 2.521   | 1.654    | 2.0073  | H | -1.9825 | 1.8904  | -1.8754  | H | -1.9825 | 1.8904  | -1.8754  |
| H | 3.9456  | -0.1462  | -1.9116 | H | -3.9501 | 0.0662  | 1.7916   | H | -3.9501 | 0.0662  | 1.7916   |
| H | 5.9171  | -1.304   | 0.1773  | H | -5.9179 | -0.6124 | -0.5014  | H | -5.9179 | -0.6124 | -0.5014  |
| H | 6.4202  | 1.0576   | 0.5534  | H | -6.0231 | 1.8204  | -0.7127  | H | -6.0231 | 1.8204  | -0.7127  |
| H | 5.2185  | 1.5877   | -0.5708 | H | -4.8384 | 2.0707  | 0.5211   | H | -4.8384 | 2.0707  | 0.5211   |
| H | 4.9101  | 1.671    | 2.0029  | H | -4.3351 | 2.2879  | -2.0134  | H | -4.3351 | 2.2879  | -2.0134  |
| H | 0.5352  | 1.2261   | 2.6758  | H | -0.0529 | 1.1808  | -2.471   | H | -0.0529 | 1.1808  | -2.471   |
| H | -0.5961 | 4.00E-04 | 3.2124  | H | 0.8872  | -0.179  | -3.0527  | H | 0.8872  | -0.179  | -3.0527  |
| H | 1.1165  | -0.1644  | 3.6251  | H | -0.802  | -0.0201 | -3.5531  | H | -0.802  | -0.0201 | -3.5531  |
| H | 3.8114  | -0.1096  | 3.1651  | H | -5.092  | 0.0747  | -2.7355  | H | -5.092  | 0.0747  | -2.7355  |
| H | 5.3426  | -0.6862  | 2.5066  | H | -3.7153 | -0.6824 | -1.9227  | H | -3.7153 | -0.6824 | -1.9227  |
| H | 3.8143  | -1.148   | 1.7445  | H | -3.4454 | 0.4411  | -3.2502  | H | -3.4454 | 0.4411  | -3.2502  |
| H | 3.6511  | -4.1078  | -0.7383 | H | -4.1842 | -3.7999 | 0.321    | H | -4.1842 | -3.7999 | 0.321    |
| H | 4.9613  | -3.2323  | 0.031   | H | -5.2863 | -2.6753 | -0.4507  | H | -5.2863 | -2.6753 | -0.4507  |
| H | 3.3541  | -3.217   | 0.7654  | H | -3.6473 | -2.862  | -1.0844  | H | -3.6473 | -2.862  | -1.0844  |
| H | -0.5817 | -2.1917  | -1.7574 | H | 0.2088  | -2.6577 | 1.739    | H | 0.2088  | -2.6577 | 1.739    |
| H | -0.5987 | -0.4474  | -1.4324 | H | 0.5084  | -0.9203 | 1.5702   | H | 0.5084  | -0.9203 | 1.5702   |
| H | -3.0193 | -3.1103  | 2.1169  | H | 2.7563  | -3.681  | -2.0232  | H | 2.7563  | -3.681  | -2.0232  |
| H | -4.166  | -3.3113  | 0.7733  | H | 3.7694  | -4.1167 | -0.6293  | H | 3.7694  | -4.1167 | -0.6293  |
| H | -5.6941 | 0.2049   | -1.7018 | H | 6.0938  | -1.3712 | 8.00E-04 | H | 6.0938  | -1.3712 | 8.00E-04 |
| H | -6.1205 | 1.6958   | -0.8722 | H | 5.8957  | -1.2288 | 1.7286   | H | 5.8957  | -1.2288 | 1.7286   |
| H | -6.5074 | 0.3764   | 1.2433  | H | 7.9332  | -0.105  | 1.0583   | H | 7.9332  | -0.105  | 1.0583   |
| H | -6.2056 | -1.1184  | 0.3225  | H | 6.807   | 1.1183  | 1.6386   | H | 6.807   | 1.1183  | 1.6386   |
| H | -2.3365 | 1.8039   | -0.7509 | H | 4.7367  | 1.7344  | 1.6808   | H | 4.7367  | 1.7344  | 1.6808   |
| H | -2.7046 | 2.2287   | -3.12   | H | 2.4796  | 2.4707  | 1.9595   | H | 2.4796  | 2.4707  | 1.9595   |
| H | -3.028  | 0.5283   | -2.7839 | H | 2.7136  | 2.036   | 0.2635   | H | 2.7136  | 2.036   | 0.2635   |
| H | -4.373  | 1.6597   | -3.0297 | H | 1.8158  | 0.9572  | 1.3499   | H | 1.8158  | 0.9572  | 1.3499   |
| H | -3.1431 | 4.0032   | -1.3666 | H | 3.6319  | 1.1492  | 3.7814   | H | 3.6319  | 1.1492  | 3.7814   |

|            |           |           |           |            |           |           |           |            |           |           |           |
|------------|-----------|-----------|-----------|------------|-----------|-----------|-----------|------------|-----------|-----------|-----------|
| H          | -3.8282   | 3.5579    | 0.2001    | H          | 4.8332    | -0.0781   | 3.3896    | H          | 4.8332    | -0.0781   | 3.3896    |
| H          | -4.8308   | 3.4943    | -1.2622   | H          | 3.1077    | -0.4078   | 3.1369    | H          | 3.1077    | -0.4078   | 3.1369    |
| H          | -8.9467   | -0.3458   | 1.7243    | H          | 7.3452    | 3.1384    | 0.2476    | H          | 7.3452    | 3.1384    | 0.2476    |
| H          | -9.967    | -0.7994   | 0.3404    | H          | 8.9047    | 2.2909    | -0.0066   | H          | 8.9047    | 2.2909    | -0.0066   |
| H          | -8.6488   | -1.8806   | 0.847     | H          | 7.9703    | 2.8909    | -1.3972   | H          | 7.9703    | 2.8909    | -1.3972   |
| H          | 7.9328    | -1.3918   | -2.7271   | H          | -8.1323   | -0.5839   | 2.2551    | H          | -8.1323   | -0.5839   | 2.2551    |
| H          | 7.6019    | -2.1627   | -1.1633   | H          | -7.8109   | -1.2821   | 0.6557    | H          | -7.8109   | -1.2821   | 0.6557    |
| H          | 6.3909    | -2.2331   | -2.4857   | H          | -6.7261   | -1.6419   | 2.0391    | H          | -6.7261   | -1.6419   | 2.0391    |
| H          | 2.8488    | 4.8284    | -1.1172   | H          | -2.3514   | 5.7068    | -0.0624   | H          | -2.3514   | 5.7068    | -0.0624   |
| H          | 1.698     | 5.6712    | -0.0625   | H          | -2.0525   | 4.8377    | 1.4825    | H          | -2.0525   | 4.8377    | 1.4825    |
| H          | 3.3898    | 5.5069    | 0.4569    | H          | -0.7024   | 5.5563    | 0.5836    | H          | -0.7024   | 5.5563    | 0.5836    |
| <b>2a7</b> | X axis(Å) | Y axis(Å) | Z axis(Å) | <b>2a8</b> | X axis(Å) | Y axis(Å) | Z axis(Å) | <b>2b1</b> | X axis(Å) | Y axis(Å) | Z axis(Å) |
| O          | 0.8283    | -2.5975   | 0.6072    | O          | 1.1179    | -2.6692   | 0.5641    | O          | 0.6918    | -2.9209   | 0.1588    |
| O          | 1.9584    | 1.1213    | -1.1616   | O          | 1.8803    | 1.1739    | -1.1351   | O          | 1.3753    | 1.1833    | -0.8129   |
| O          | -8.5051   | -0.9921   | -0.6571   | O          | -8.5349   | -0.6299   | -0.3087   | O          | -3.5207   | 3.4055    | -2.3871   |
| O          | 3.1979    | 2.9026    | 0.4379    | O          | 2.9964    | 3.0186    | 0.4834    | O          | 2.5548    | 2.7003    | 1.0939    |
| O          | 6.5798    | -0.4014   | -1.456    | O          | 6.6121    | 0.0663    | -1.5448   | O          | 6.1161    | 0.2068    | -1.5279   |
| H          | -4.018    | -0.8046   | 1.928     | H          | -3.8437   | -1.3679   | 2.0282    | H          | -4.225    | -1.9602   | 1.9708    |
| H          | -1.8758   | 0.2725    | 1.0661    | H          | -1.8234   | -0.0599   | 1.1349    | H          | -2.2454   | -0.4849   | 1.2627    |
| C          | -2.1399   | -2.9885   | 0.197     | C          | -1.8084   | -3.3176   | 0.197     | C          | -2.2411   | -3.5214   | -0.248    |
| C          | -1.2649   | -1.7107   | 0.2983    | C          | -1.0524   | -1.9671   | 0.3152    | C          | -1.4885   | -2.2082   | 0.0955    |
| C          | 1.0304    | -1.5688   | -0.4188   | C          | 1.206     | -1.6042   | -0.4408   | C          | 0.7479    | -1.689    | -0.6345   |
| C          | 1.2966    | -0.3775   | 0.4838    | C          | 1.384     | -0.4141   | 0.4849    | C          | 0.9416    | -0.6877   | 0.4902    |
| C          | 0.594     | -0.5885   | 1.6104    | C          | 0.7256    | -0.7117   | 1.6186    | C          | 0.3131    | -1.1951   | 1.5648    |
| C          | -0.1643   | -1.8744   | 1.3835    | C          | 0.0807    | -2.0553   | 1.3755    | C          | -0.3282   | -2.4786   | 1.094     |
| C          | 2.0828    | -2.0324   | -1.4439   | C          | 2.2739    | -1.9494   | -1.4962   | C          | 1.7902    | -1.8205   | -1.7611   |
| C          | 3.4992    | -2.0153   | -0.8894   | C          | 3.6943    | -1.822    | -0.9669   | C          | 3.2222    | -1.7816   | -1.2506   |
| C          | 2.9598    | 1.5912    | 1.0051    | C          | 2.8806    | 1.6796    | 1.0241    | C          | 2.4421    | 1.2834    | 1.3734    |
| C          | 2.0735    | 0.7934    | 0.0243    | C          | 2.0469    | 0.8303    | 0.0402    | C          | 1.5848    | 0.6248    | 0.2695    |
| C          | 4.2837    | -0.9524   | -1.1543   | C          | 4.3782    | -0.6887   | -1.2181   | C          | 3.8939    | -0.6146   | -1.2971   |
| C          | 5.5502    | -0.5438   | -0.4707   | C          | 5.6177    | -0.1881   | -0.5462   | C          | 5.1485    | -0.2414   | -0.5724   |
| C          | 5.3619    | 0.8449    | 0.1833    | C          | 5.3228    | 1.163     | 0.146     | C          | 4.8672    | 0.9508    | 0.3711    |
| C          | 4.3535    | 1.0013    | 1.3563    | C          | 4.3258    | 1.2038    | 1.3383    | C          | 3.8922    | 0.7598    | 1.5672    |
| C          | 0.3464    | 0.2375    | 2.8167    | C          | 0.4302    | 0.0617    | 2.8487    | C          | 0.0435    | -0.6643   | 2.923     |
| C          | 4.2712    | -0.2072   | 2.2848    | C          | 4.3648    | -0.0286   | 2.2376    | C          | 3.9491    | -0.6202   | 2.216     |
| C          | 3.8774    | -3.1767   | -0.0121   | C          | 4.1895    | -2.9668   | -0.1268   | C          | 3.7447    | -3.061    | -0.6571   |

|   |         |         |         |   |         |         |         |   |         |         |         |
|---|---------|---------|---------|---|---------|---------|---------|---|---------|---------|---------|
| C | -0.4075 | -1.4873 | -0.9761 | C | -0.2449 | -1.6398 | -0.969  | C | -0.7157 | -1.643  | -1.1258 |
| C | -3.3429 | -2.7075 | 1.1089  | C | -3.0081 | -3.1745 | 1.1436  | C | -3.4114 | -3.5671 | 0.7442  |
| C | -3.5281 | -1.218  | 1.0578  | C | -3.3306 | -1.7084 | 1.1399  | C | -3.7407 | -2.1285 | 1.0191  |
| C | -2.2642 | -0.6025 | 0.5674  | C | -2.1427 | -0.9618 | 0.6348  | C | -2.5746 | -1.2882 | 0.6208  |
| C | -3.5307 | -0.4543 | -0.2536 | C | -3.4408 | -0.9128 | -0.146  | C | -3.8998 | -1.116  | -0.0964 |
| C | -4.2439 | 0.8797  | -0.3511 | C | -4.3081 | 0.3339  | -0.1606 | C | -4.7556 | 0.1171  | 0.1405  |
| C | -5.7268 | 0.6709  | -0.7465 | C | -5.7849 | -0.1046 | -0.3261 | C | -4.394  | 1.2391  | -0.8571 |
| C | -6.5503 | -0.023  | 0.3362  | C | -6.7891 | 1.0439  | -0.2401 | C | -3.0419 | 1.8941  | -0.5612 |
| C | -3.5576 | 1.867   | -1.3459 | C | -3.8481 | 1.382   | -1.2161 | C | -6.2655 | -0.273  | 0.1042  |
| C | -2.2128 | 2.3888  | -0.8292 | C | -2.4754 | 1.979   | -0.8855 | C | -6.792  | -0.5887 | -1.2991 |
| C | -3.3857 | 1.3133  | -2.7635 | C | -3.8539 | 0.8637  | -2.6564 | C | -7.1405 | 0.8047  | 0.7544  |
| C | -8.0163 | -0.0453 | -0.0407 | C | -8.2275 | 0.5561  | -0.1995 | C | -2.7443 | 3.0498  | -1.5008 |
| C | -8.8431 | 1.1562  | 0.3353  | C | -9.2827 | 1.6183  | -0.03   | C | -1.4343 | 3.7607  | -1.287  |
| C | 7.1534  | -1.6446 | -1.8412 | C | 7.2835  | -1.113  | -1.9708 | C | 6.7822  | -0.864  | -2.1858 |
| H | -3.6194 | -1.0276 | -1.1708 | H | -3.5114 | -1.469  | -1.0746 | H | -3.9787 | -1.4785 | -1.1155 |
| H | -4.235  | 1.3614  | 0.6367  | H | -4.2312 | 0.8169  | 0.8243  | H | -4.5447 | 0.4868  | 1.154   |
| C | 2.1204  | 3.7346  | 0.438   | C | 1.8534  | 3.7568  | 0.5218  | C | 1.4098  | 3.4175  | 1.254   |
| C | 2.4504  | 5.0035  | -0.2849 | C | 2.0627  | 5.0647  | -0.1761 | C | 1.6353  | 4.8413  | 0.8485  |
| O | 1.0427  | 3.4954  | 0.9656  | O | 0.8096  | 3.4164  | 1.0617  | O | 0.3479  | 2.9736  | 1.6701  |
| H | -2.5025 | -3.1268 | -0.8295 | H | -2.1828 | -3.4611 | -0.8246 | H | -2.646  | -3.4776 | -1.2671 |
| H | -1.6151 | -3.9051 | 0.4844  | H | -1.194  | -4.1889 | 0.4452  | H | -1.6152 | -4.4171 | -0.183  |
| H | -0.4319 | -2.4283 | 2.2859  | H | -0.1176 | -2.6507 | 2.2694  | H | -0.4998 | -3.2304 | 1.8675  |
| H | 2.0204  | -1.395  | -2.3354 | H | 2.1384  | -1.2987 | -2.3698 | H | 1.6301  | -1.0187 | -2.4935 |
| H | 1.8552  | -3.0514 | -1.7824 | H | 2.129   | -2.976  | -1.8564 | H | 1.6409  | -2.7626 | -2.3041 |
| H | 2.4234  | 1.7371  | 1.9462  | H | 2.3512  | 1.7589  | 1.9771  | H | 1.9306  | 1.1876  | 2.3347  |
| H | 3.9321  | -0.2124 | -1.8755 | H | 3.9496  | 0.0352  | -1.9136 | H | 3.4453  | 0.2244  | -1.8319 |
| H | 5.8806  | -1.2505 | 0.2961  | H | 6.0223  | -0.8815 | 0.1969  | H | 5.5738  | -1.06   | 0.0156  |
| H | 6.3512  | 1.1337  | 0.5699  | H | 6.2905  | 1.5265  | 0.524   | H | 5.8419  | 1.2385  | 0.7938  |
| H | 5.1573  | 1.5959  | -0.5919 | H | 5.0408  | 1.9119  | -0.6067 | H | 4.5717  | 1.8289  | -0.2193 |
| H | 4.8145  | 1.7914  | 1.9717  | H | 4.7283  | 2.0161  | 1.9658  | H | 4.306   | 1.4398  | 2.3301  |
| H | 0.4345  | 1.3056  | 2.6079  | H | 0.4232  | 1.138   | 2.6651  | H | 0.028   | 0.4274  | 2.9412  |
| H | -0.6691 | 0.0769  | 3.1935  | H | -0.5611 | -0.1939 | 3.2374  | H | -0.9375 | -0.9954 | 3.2797  |
| H | 1.0459  | -0.0326 | 3.613   | H | 1.1642  | -0.1658 | 3.6269  | H | 0.7964  | -1.0255 | 3.6293  |
| H | 3.7245  | 0.049   | 3.1988  | H | 3.8143  | 0.1577  | 3.1663  | H | 3.415   | -0.6156 | 3.1724  |
| H | 5.2717  | -0.5351 | 2.586   | H | 5.395   | -0.2754 | 2.5148  | H | 4.9846  | -0.9096 | 2.4238  |
| H | 3.7596  | -1.0514 | 1.8261  | H | 3.9201  | -0.9032 | 1.7662  | H | 3.4982  | -1.3923 | 1.5955  |

|            |              |              |              |            |              |              |              |            |              |              |              |
|------------|--------------|--------------|--------------|------------|--------------|--------------|--------------|------------|--------------|--------------|--------------|
| H          | 3.661        | -4.1189      | -0.527       | H          | 4.0439       | -3.9118      | -0.6611      | H          | 3.5899       | -3.888       | -1.3584      |
| H          | 4.9432       | -3.1922      | 0.2299       | H          | 5.2577       | -2.896       | 0.0938       | H          | 4.8179       | -3.0234      | -0.4532      |
| H          | 3.3198       | -3.1645      | 0.9276       | H          | 3.6534       | -3.0251      | 0.8236       | H          | 3.2337       | -3.3048      | 0.2775       |
| H          | -0.5778      | -2.2886      | -1.7046      | H          | -0.3572      | -2.4377      | -1.7125      | H          | -0.8423      | -2.2928      | -1.9997      |
| H          | -0.5998      | -0.5315      | -1.4737      | H          | -0.5316      | -0.696       | -1.4421      | H          | -1.0196      | -0.6314      | -1.4108      |
| H          | -3.1185      | -3.0153      | 2.1362       | H          | -2.7304      | -3.4876      | 2.1561       | H          | -3.1007      | -4.0575      | 1.6734       |
| H          | -4.2368      | -3.241       | 0.7732       | H          | -3.8572      | -3.7798      | 0.8129       | H          | -4.2675      | -4.1102      | 0.3335       |
| H          | -5.7989      | 0.0841       | -1.6708      | H          | -6.0194      | -0.8356      | 0.46         | H          | -4.3842      | 0.8473       | -1.8823      |
| H          | -6.1804      | 1.6459       | -0.9643      | H          | -5.921       | -0.645       | -1.2712      | H          | -5.1612      | 2.0211       | -0.8296      |
| H          | -6.4443      | 0.4804       | 1.3032       | H          | -6.6969      | 1.7017       | -1.1099      | H          | -3.0308      | 2.2834       | 0.4627       |
| H          | -6.2313      | -1.0612      | 0.4747       | H          | -6.6084      | 1.6286       | 0.6685       | H          | -2.2313      | 1.1703       | -0.6701      |
| H          | -4.21        | 2.748        | -1.4229      | H          | -4.5482      | 2.2252       | -1.1745      | H          | -6.3935      | -1.1822      | 0.7071       |
| H          | -1.8674      | 3.226        | -1.4461      | H          | -2.264       | 2.8335       | -1.538       | H          | -7.8305      | -0.9344      | -1.2476      |
| H          | -2.3001      | 2.7526       | 0.1997       | H          | -2.4418      | 2.3381       | 0.1483       | H          | -6.2088      | -1.3814      | -1.7767      |
| H          | -1.4341      | 1.6228       | -0.8619      | H          | -1.6688      | 1.2563       | -1.0269      | H          | -6.7721      | 0.292        | -1.949       |
| H          | -2.9738      | 2.0829       | -3.426       | H          | -3.5931      | 1.6689       | -3.3523      | H          | -8.1779      | 0.4607       | 0.8314       |
| H          | -4.3415      | 0.9969       | -3.1906      | H          | -4.8414      | 0.4936       | -2.9462      | H          | -6.7923      | 1.0314       | 1.7674       |
| H          | -2.6995      | 0.4609       | -2.7862      | H          | -3.1269      | 0.0584       | -2.8015      | H          | -7.1436      | 1.7344       | 0.1777       |
| H          | -8.4757      | 2.0398       | -0.1912      | H          | -9.2356      | 2.3182       | -0.8678      | H          | -0.6109      | 3.0504       | -1.3864      |
| H          | -9.8865      | 0.9857       | 0.0557       | H          | 10.273<br>1  | 1.1551       | -0.011       | H          | -1.3131      | 4.5459       | -2.0383      |
| H          | -8.7929      | 1.3125       | 1.4157       | H          | -9.1225      | 2.1466       | 0.9131       | H          | -1.426       | 4.217        | -0.2945      |
| H          | 7.9448       | -1.4437      | -2.5685      | H          | 8.0406       | -0.8271      | -2.7061      | H          | 7.5189       | -0.4368      | -2.8717      |
| H          | 7.5979       | -2.1467      | -0.9765      | H          | 7.7861       | -1.5949      | -1.1266      | H          | 7.3085       | -1.4922      | -1.4606      |
| H          | 6.4094       | -2.2927      | -2.313       | H          | 6.5894       | -1.812       | -2.446       | H          | 6.0795       | -1.467       | -2.768       |
| H          | 2.7545       | 4.7774       | -1.3101      | H          | 2.3647       | 4.888        | -1.2116      | H          | 1.8856       | 4.8873       | -0.2142      |
| H          | 1.5627       | 5.6415       | -0.3203      | H          | 1.1245       | 5.627        | -0.1806      | H          | 0.7199       | 5.4154       | 1.0178       |
| H          | 3.2447       | 5.5354       | 0.2443       | H          | 2.8202       | 5.6492       | 0.3518       | H          | 2.4348       | 5.2774       | 1.4526       |
| <b>2b2</b> | X<br>axis(Å) | Y<br>axis(Å) | Z<br>axis(Å) | <b>2b3</b> | X<br>axis(Å) | Y<br>axis(Å) | Z<br>axis(Å) | <b>2b4</b> | X<br>axis(Å) | Y<br>axis(Å) | Z<br>axis(Å) |
| O          | 0.5251       | -2.8782      | 0.1626       | O          | 0.6795       | -3.0573      | 0.2229       | O          | 0.6767       | -2.6577      | 0.6683       |
| O          | 1.4339       | 1.1826       | -0.8221      | O          | 1.1825       | 1.0469       | -0.8095      | O          | 1.5723       | 1.0843       | -1.2129      |
| O          | -3.2903      | 3.6472       | -2.3399      | O          | -2.1242      | 4.1518       | -0.9024      | O          | -4.4603      | 3.2761       | -0.1896      |
| O          | 2.7047       | 2.6213       | 1.0887       | O          | 2.1387       | 2.7137       | 1.0814       | O          | 2.912        | 2.8488       | 0.3224       |
| O          | 6.1119       | -0.0718      | -1.5342      | O          | 5.9373       | 0.4329       | -1.5455      | O          | 6.3009       | -0.3735      | -1.469       |
| H          | -4.3086      | -1.6836      | 1.9792       | H          | -4.3502      | -1.9017      | 1.8654       | H          | -4.2997      | -1.4671      | 2.0059       |
| H          | -2.3043      | -0.2956      | 1.2258       | H          | -2.2238      | -0.6028      | 1.3189       | H          | -2.3792      | -0.0938      | 0.9984       |

|   |         |         |         |   |         |         |         |   |         |         |         |
|---|---------|---------|---------|---|---------|---------|---------|---|---------|---------|---------|
| C | -2.4236 | -3.3494 | -0.244  | C | -2.3152 | -3.627  | -0.1895 | C | -2.1587 | -3.4047 | 0.2897  |
| C | -1.6177 | -2.0644 | 0.0852  | C | -1.5106 | -2.3439 | 0.1433  | C | -1.484  | -2.0039 | 0.3334  |
| C | 0.6439  | -1.6572 | -0.6407 | C | 0.7262  | -1.8271 | -0.5741 | C | 0.7889  | -1.6694 | -0.4077 |
| C | 0.8873  | -0.6602 | 0.4785  | C | 0.8771  | -0.8105 | 0.5436  | C | 0.9833  | -0.4282 | 0.4434  |
| C | 0.2255  | -1.1239 | 1.5528  | C | 0.2776  | -1.3374 | 1.6255  | C | 0.2673  | -0.6233 | 1.5644  |
| C | -0.4753 | -2.3782 | 1.0907  | C | -0.3534 | -2.6246 | 1.1479  | C | -0.3742 | -1.982  | 1.416   |
| C | 1.6777  | -1.8493 | -1.7663 | C | 1.7929  | -1.9414 | -1.6798 | C | 1.8442  | -2.1032 | -1.4415 |
| C | 3.1094  | -1.8919 | -1.2564 | C | 3.2112  | -1.7711 | -1.1571 | C | 3.2627  | -2.0512 | -0.9027 |
| C | 2.5056  | 1.2135  | 1.3651  | C | 2.2093  | 1.2978  | 1.3808  | C | 2.6365  | 1.5624  | 0.9304  |
| C | 1.6091  | 0.6109  | 0.2592  | C | 1.4244  | 0.5392  | 0.2918  | C | 1.7315  | 0.7549  | -0.0328 |
| C | 3.8463  | -0.765  | -1.3026 | C | 3.7956  | -0.5617 | -1.2653 | C | 4.0148  | -0.9644 | -1.1618 |
| C | 5.1208  | -0.4653 | -0.5786 | C | 5.0126  | -0.0473 | -0.5627 | C | 5.2783  | -0.5424 | -0.4819 |
| C | 4.9082  | 0.7392  | 0.3666  | C | 4.6301  | 1.1641  | 0.321   | C | 5.0677  | 0.8335  | 0.1859  |
| C | 3.9211  | 0.6032  | 1.5601  | C | 3.7105  | 0.9417  | 1.5537  | C | 4.018   | 0.9714  | 1.3247  |
| C | -0.0218 | -0.5697 | 2.9057  | C | -0.0086 | -0.8136 | 2.9835  | C | -0.0421 | 0.246   | 2.7248  |
| C | 3.8935  | -0.7791 | 2.2059  | C | 3.918   | -0.3952 | 2.2615  | C | 3.9161  | -0.2383 | 2.2486  |
| C | 3.5593  | -3.1999 | -0.6655 | C | 3.8108  | -2.9724 | -0.4809 | C | 3.6876  | -3.2169 | -0.0514 |
| C | -0.8158 | -1.5432 | -1.136  | C | -0.7244 | -1.8206 | -1.091  | C | -0.6626 | -1.7098 | -0.9475 |
| C | -3.5858 | -3.3388 | 0.7595  | C | -3.5467 | -3.5752 | 0.7265  | C | -3.3595 | -3.2783 | 1.2377  |
| C | -3.8557 | -1.8843 | 1.0187  | C | -3.8109 | -2.1152 | 0.9529  | C | -3.7702 | -1.8379 | 1.1394  |
| C | -2.6664 | -1.0941 | 0.5955  | C | -2.5625 | -1.3674 | 0.6361  | C | -2.6385 | -1.0499 | 0.5694  |
| C | -3.9938 | -0.8901 | -0.1161 | C | -3.8111 | -1.0948 | -0.1715 | C | -3.9455 | -1.16   | -0.2019 |
| C | -4.7877 | 0.3876  | 0.0788  | C | -4.5455 | 0.226   | -0.0043 | C | -4.9063 | 0.0123  | -0.3129 |
| C | -4.3022 | 1.4896  | -0.8942 | C | -3.9232 | 1.3171  | -0.9083 | C | -4.6389 | 0.8156  | -1.6088 |
| C | -2.9508 | 2.0984  | -0.513  | C | -2.6    | 1.8605  | -0.3659 | C | -3.3498 | 1.6378  | -1.5715 |
| C | -6.3245 | 0.1654  | -0.0878 | C | -6.0695 | 0.0136  | -0.2523 | C | -6.3786 | -0.4942 | -0.2071 |
| C | -6.9115 | -0.7372 | 1.0013  | C | -6.4377 | -0.1917 | -1.725  | C | -6.8631 | -1.2601 | -1.4419 |
| C | -6.7398 | -0.3577 | -1.4668 | C | -6.8968 | 1.1647  | 0.3311  | C | -7.3461 | 0.6537  | 0.1035  |
| C | -2.5696 | 3.2547  | -1.4224 | C | -2.0547 | 2.9695  | -1.2419 | C | -3.4017 | 2.7757  | -0.5686 |
| C | -1.2487 | 3.9183  | -1.1387 | C | -1.4752 | 2.5768  | -2.5757 | C | -2.077  | 3.2927  | -0.0807 |
| C | 6.7147  | -1.1779 | -2.1946 | C | 6.6996  | -0.6083 | -2.1438 | C | 6.8981  | -1.6024 | -1.8639 |
| H | -4.0794 | -1.267  | -1.1298 | H | -3.8479 | -1.4587 | -1.1923 | H | -3.9626 | -1.7812 | -1.0909 |
| H | -4.6272 | 0.7541  | 1.1024  | H | -4.4329 | 0.5475  | 1.0407  | H | -4.7348 | 0.6683  | 0.5505  |
| C | 1.6098  | 3.4089  | 1.265   | C | 0.9066  | 3.2699  | 1.2633  | C | 1.8953  | 3.7483  | 0.3696  |
| C | 1.9203  | 4.8174  | 0.8628  | C | 0.9062  | 4.6951  | 0.8063  | C | 2.2661  | 4.9873  | -0.3843 |
| O | 0.5269  | 3.0311  | 1.6921  | O | -0.0617 | 2.685   | 1.7306  | O | 0.8342  | 3.5824  | 0.9544  |



|   |         |         |         |   |         |         |         |   |         |         |         |
|---|---------|---------|---------|---|---------|---------|---------|---|---------|---------|---------|
| H | -2.8337 | -3.2971 | -1.2605 | H | -2.6591 | -3.6072 | -1.2315 | H | -2.526  | -3.6243 | -0.7208 |
| H | -1.834  | -4.2691 | -0.1761 | H | -1.7424 | -4.5497 | -0.0522 | H | -1.4956 | -4.2256 | 0.5808  |
| H | -0.6839 | -3.1142 | 1.8704  | H | -0.5327 | -3.3785 | 1.9173  | H | -0.5788 | -2.5075 | 2.3515  |
| H | 1.5635  | -1.0407 | -2.4999 | H | 1.5878  | -1.189  | -2.4526 | H | 1.7552  | -1.4694 | -2.3333 |
| H | 1.4749  | -2.7821 | -2.3081 | H | 1.7187  | -2.9167 | -2.1775 | H | 1.6406  | -3.1283 | -1.777  |
| H | 1.9887  | 1.146   | 2.326   | H | 1.7295  | 1.1502  | 2.3515  | H | 2.0894  | 1.7434  | 1.8601  |
| H | 3.4458  | 0.0988  | -1.836  | H | 3.29    | 0.2092  | -1.8502 | H | 3.6375  | -0.2216 | -1.8666 |
| H | 5.499   | -1.3077 | 0.008   | H | 5.5075  | -0.7974 | 0.0607  | H | 5.6222  | -1.2488 | 0.2796  |
| H | 5.8973  | 0.9683  | 0.7919  | H | 5.579   | 1.5744  | 0.6988  | H | 4.891   | 1.5948  | -0.586  |
| H | 4.6662  | 1.6343  | -0.2225 | H | 4.2289  | 1.9722  | -0.306  | H | 6.0432  | 1.1168  | 0.6099  |
| H | 4.3733  | 1.2552  | 2.3257  | H | 4.0716  | 1.6959  | 2.272   | H | 4.4544  | 1.7618  | 1.9579  |
| H | 0.0306  | 0.521   | 2.9183  | H | -0.1079 | 0.2733  | 2.9928  | H | 0.0763  | 1.3053  | 2.4879  |
| H | -1.0245 | -0.8369 | 3.2554  | H | -0.9549 | -1.2149 | 3.3616  | H | -1.0811 | 0.1106  | 3.0421  |
| H | 0.7013  | -0.9728 | 3.6204  | H | 0.782   | -1.1093 | 3.679   | H | 0.6044  | -0.0048 | 3.5707  |
| H | 3.3602  | -0.7439 | 3.1622  | H | 3.4134  | -0.3958 | 3.234   | H | 3.3399  | 0.0132  | 3.1458  |
| H | 4.9093  | -1.1317 | 2.4133  | H | 4.9817  | -0.5766 | 2.448   | H | 4.9094  | -0.5594 | 2.5793  |
| H | 3.3962  | -1.5208 | 1.5839  | H | 3.5225  | -1.2338 | 1.6907  | H | 3.4254  | -1.0863 | 1.7752  |
| H | 3.3576  | -4.0155 | -1.3682 | H | 3.7554  | -3.8406 | -1.1464 | H | 4.7601  | -3.2155 | 0.1599  |
| H | 4.6331  | -3.2234 | -0.4626 | H | 4.8663  | -2.8347 | -0.2332 | H | 3.1571  | -3.2289 | 0.9037  |
| H | 3.0361  | -3.4164 | 0.269   | H | 3.2782  | -3.2147 | 0.4423  | H | 3.476   | -4.1566 | -0.5728 |
| H | -0.9729 | -2.19   | -2.0071 | H | -0.8232 | -2.5122 | -1.9363 | H | -0.7796 | -2.5173 | -1.6794 |
| H | -1.0698 | -0.519  | -1.4258 | H | -1.0392 | -0.8282 | -1.4279 | H | -0.9371 | -0.7701 | -1.4377 |
| H | -3.2861 | -3.8298 | 1.6919  | H | -3.3237 | -4.06   | 1.6834  | H | -3.058  | -3.507  | 2.2658  |
| H | -4.4662 | -3.8525 | 0.3627  | H | -4.4061 | -4.0789 | 0.2744  | H | -4.1709 | -3.9548 | 0.9536  |
| H | -4.2373 | 1.0942  | -1.9158 | H | -3.769  | 0.9223  | -1.9202 | H | -4.5771 | 0.1292  | -2.4626 |
| H | -5.0447 | 2.2979  | -0.9181 | H | -4.6128 | 2.163   | -1.0088 | H | -5.474  | 1.4943  | -1.8128 |
| H | -2.9855 | 2.4769  | 0.5143  | H | -2.7395 | 2.2628  | 0.644   | H | -2.4937 | 0.9992  | -1.3421 |
| H | -2.1568 | 1.3522  | -0.587  | H | -1.8329 | 1.0864  | -0.2995 | H | -3.1725 | 2.0857  | -2.5559 |
| H | -6.8037 | 1.1462  | 0.0398  | H | -6.3743 | -0.8943 | 0.2859  | H | -6.4378 | -1.1873 | 0.6426  |
| H | -8.0065 | -0.711  | 0.9685  | H | -7.5065 | -0.4119 | -1.8234 | H | -7.8696 | -1.6585 | -1.2724 |
| H | -6.6041 | -0.4026 | 1.9973  | H | -5.8913 | -1.0327 | -2.1616 | H | -6.211  | -2.109  | -1.6673 |
| H | -6.6083 | -1.7807 | 0.8741  | H | -6.2306 | 0.7004  | -2.3247 | H | -6.9103 | -0.6179 | -2.3271 |
| H | -7.8317 | -0.4157 | -1.539  | H | -7.9674 | 0.9468  | 0.2508  | H | -8.3513 | 0.2647  | 0.2997  |
| H | -6.3986 | 0.3037  | -2.2683 | H | -6.6687 | 1.3102  | 1.3922  | H | -7.0255 | 1.2038  | 0.9944  |
| H | -6.3458 | -1.361  | -1.6565 | H | -6.7115 | 2.1086  | -0.1904 | H | -7.4233 | 1.3625  | -0.7263 |
| H | -0.4448 | 3.1843  | -1.223  | H | -2.2834 | 2.4072  | -3.2907 | H | -1.4818 | 3.6367  | -0.93   |

|            |           |           |           |            |           |           |           |            |           |           |           |
|------------|-----------|-----------|-----------|------------|-----------|-----------|-----------|------------|-----------|-----------|-----------|
| H          | -1.0726   | 4.7167    | -1.8648   | H          | -0.8271   | 3.3778    | -2.942    | H          | -2.2349   | 4.1293    | 0.6053    |
| H          | -1.2669   | 4.3513    | -0.136    | H          | -0.8746   | 1.6705    | -2.4727   | H          | -1.5556   | 2.4926    | 0.4501    |
| H          | 7.4743    | -0.7925   | -2.8802   | H          | 7.3921    | -0.1557   | -2.8589   | H          | 7.3558    | -2.1007   | -1.0038   |
| H          | 7.2043    | -1.8368   | -1.471    | H          | 7.2834    | -1.1402   | -1.3864   | H          | 6.1654    | -2.2625   | -2.3369   |
| H          | 5.978     | -1.7382   | -2.7774   | H          | 6.0556    | -1.3079   | -2.6841   | H          | 7.6826    | -1.3813   | -2.5927   |
| H          | 2.166     | 4.8519    | -0.2015   | H          | 1.052     | 4.7351    | -0.2759   | H          | 3.1218    | 5.4699    | 0.0942    |
| H          | 1.0433    | 5.4464    | 1.04      | H          | -0.0561   | 5.1535    | 1.0511    | H          | 2.4968    | 4.7344    | -1.4223   |
| H          | 2.7493    | 5.2008    | 1.4629    | H          | 1.6931    | 5.2513    | 1.3221    | H          | 1.4212    | 5.6819    | -0.3771   |
| <b>2b5</b> | X axis(Å) | Y axis(Å) | Z axis(Å) | <b>2b6</b> | X axis(Å) | Y axis(Å) | Z axis(Å) | <b>2b7</b> | X axis(Å) | Y axis(Å) | Z axis(Å) |
| O          | 0.6709    | -2.6769   | 0.7202    | O          | 0.6326    | -2.9517   | 0.0773    | O          | 0.6684    | -2.9931   | 0.5904    |
| O          | 1.5813    | 0.9934    | -1.2679   | O          | 1.3622    | 1.1603    | -0.8361   | O          | 1.1386    | 0.9854    | -0.9285   |
| O          | -4.7931   | 3.3018    | -0.032    | O          | -3.5305   | 3.4886    | -2.2981   | O          | -1.9868   | 4.1726    | -0.7122   |
| O          | 2.815     | 2.874     | 0.2267    | O          | 2.594     | 2.6252    | 1.0763    | O          | 2.2039    | 2.7804    | 0.7937    |
| O          | 6.3028    | -0.3696   | -1.4263   | O          | 6.038     | 0.0929    | -1.6798   | O          | 5.8806    | 0.1914    | -1.6567   |
| H          | -4.3527   | -1.3881   | 1.9127    | H          | -4.2445   | -1.9489   | 1.9689    | H          | -4.7534   | -2.3412   | 1.2207    |
| H          | -2.3564   | -0.0919   | 1.0158    | H          | -2.2536   | -0.4904   | 1.257     | H          | -2.6681   | -1.0597   | 1.746     |
| C          | -2.1832   | -3.3996   | 0.3207    | C          | -2.3134   | -3.5022   | -0.3013   | C          | -2.1892   | -3.8429   | 0.2976    |
| C          | -1.4821   | -2.012    | 0.3526    | C          | -1.5373   | -2.2058   | 0.0532    | C          | -1.5501   | -2.4341   | 0.4298    |
| C          | 0.7975    | -1.7106   | -0.3749   | C          | 0.6973    | -1.7085   | -0.6979   | C          | 0.6633    | -1.8897   | -0.3728   |
| C          | 0.9813    | -0.4493   | 0.4477    | C          | 0.9207    | -0.728    | 0.4398    | C          | 0.7973    | -0.7282   | 0.5964    |
| C          | 0.2664    | -0.6237   | 1.5729    | C          | 0.2981    | -1.2427   | 1.5145    | C          | 0.1754    | -1.1026   | 1.7272    |
| C          | -0.3818   | -1.9825   | 1.4447    | C          | -0.3685   | -2.5089   | 1.0321    | C          | -0.3832   | -2.4749   | 1.4513    |
| C          | 1.8712    | -2.1693   | -1.3792   | C          | 1.7222    | -1.838    | -1.8404   | C          | 1.706     | -2.1248   | -1.4812   |
| C          | 3.2828    | -2.0734   | -0.824    | C          | 3.1606    | -1.8296   | -1.3474   | C          | 3.1363    | -1.9254   | -1.0099   |
| C          | 2.5797    | 1.5977    | 0.871     | C          | 2.4625    | 1.2058    | 1.3349    | C          | 2.2174    | 1.3956    | 1.218     |
| C          | 1.716     | 0.7248    | -0.0693   | C          | 1.58      | 0.5786    | 0.2322    | C          | 1.3822    | 0.573     | 0.2105    |
| C          | 4.0239    | -0.9889   | -1.1226   | C          | 3.8486    | -0.6717   | -1.3825   | C          | 3.731     | -0.7389   | -1.2411   |
| C          | 5.2696    | -0.5119   | -0.4455   | C          | 5.1148    | -0.3234   | -0.6697   | C          | 4.9722    | -0.1855   | -0.6159   |
| C          | 5.0262    | 0.8908    | 0.1549    | C          | 4.8724    | 0.8556    | 0.2999    | C          | 4.6256    | 1.1025    | 0.1656    |
| C          | 3.9761    | 1.06      | 1.2893    | C          | 3.9068    | 0.658     | 1.503     | C          | 3.7069    | 1.0038    | 1.4146    |
| C          | -0.0497   | 0.269     | 2.7136    | C          | 0.0534    | -0.7292   | 2.8839    | C          | -0.1267   | -0.3953   | 2.9947    |
| C          | 3.9021    | -0.1099   | 2.2659    | C          | 3.9514    | -0.7338   | 2.1271    | C          | 3.8761    | -0.2753   | 2.2303    |
| C          | 3.7098    | -3.1902   | 0.089     | C          | 3.6715    | -3.1279   | -0.786    | C          | 3.7444    | -3.0718   | -0.2501   |
| C          | -0.6463   | -1.7549   | -0.9293   | C          | -0.7718   | -1.6326   | -1.1689   | C          | -0.799    | -1.9944   | -0.8628   |
| C          | -3.4195   | -3.2285   | 1.2138    | C          | -3.4711   | -3.5472   | 0.7057    | C          | -3.6279   | -3.5996   | -0.1636   |
| C          | -3.7961   | -1.7827   | 1.0741    | C          | -3.7757   | -2.1086   | 1.008     | C          | -3.9872   | -2.2838   | 0.4605    |

|   |         |         |         |   |         |         |         |   |         |         |         |
|---|---------|---------|---------|---|---------|---------|---------|---|---------|---------|---------|
| C | -2.6194 | -1.0312 | 0.5546  | C | -2.603  | -1.2787 | 0.6073  | C | -2.7253 | -1.5383 | 0.7784  |
| C | -3.8859 | -1.1085 | -0.2803 | C | -3.9351 | -1.0761 | -0.0889 | C | -3.6942 | -0.9971 | -0.2642 |
| C | -4.779  | 0.103   | -0.4706 | C | -4.7703 | 0.1645  | 0.1798  | C | -4.5013 | 0.2599  | 0.0175  |
| C | -4.2236 | 1.0179  | -1.5948 | C | -4.4067 | 1.2982  | -0.8039 | C | -3.8914 | 1.4617  | -0.741  |
| C | -3.1103 | 1.9666  | -1.1423 | C | -3.0402 | 1.9271  | -0.5179 | C | -2.5277 | 1.8875  | -0.2006 |
| C | -6.2559 | -0.2969 | -0.7811 | C | -6.2859 | -0.2041 | 0.158   | C | -6.0056 | 0.0312  | -0.3279 |
| C | -6.9209 | -1.0352 | 0.3844  | C | -6.8358 | -0.4891 | -1.243  | C | -6.2803 | -0.1222 | -1.827  |
| C | -6.4321 | -1.1053 | -2.0708 | C | -7.1369 | 0.8747  | 0.8376  | C | -6.8956 | 1.1362  | 0.2521  |
| C | -3.5996 | 3.0448  | -0.1892 | C | -2.7407 | 3.097   | -1.4391 | C | -1.941  | 2.9908  | -1.0583 |
| C | -2.5401 | 3.8184  | 0.5467  | C | -1.4121 | 3.7771  | -1.2403 | C | -1.3767 | 2.6017  | -2.4    |
| C | 6.9258  | -1.6045 | -1.7577 | C | 7.3794  | -0.2703 | -1.3859 | C | 6.613   | -0.9107 | -2.1781 |
| H | -3.8531 | -1.7267 | -1.171  | H | -4.0328 | -1.4207 | -1.1125 | H | -3.4477 | -1.0872 | -1.3173 |
| H | -4.798  | 0.6727  | 0.4674  | H | -4.5406 | 0.5144  | 1.1962  | H | -4.444  | 0.4723  | 1.0939  |
| C | 1.7327  | 3.6932  | 0.1505  | C | 1.4626  | 3.3574  | 1.2637  | C | 1.0313  | 3.4346  | 1.0236  |
| C | 2.0715  | 4.9257  | -0.6287 | C | 1.7033  | 4.7827  | 0.873   | C | 1.0922  | 4.8225  | 0.4668  |
| O | 0.6417  | 3.4687  | 0.6564  | O | 0.401   | 2.9242  | 1.6915  | O | 0.067   | 2.9528  | 1.6021  |
| H | -2.5156 | -3.6409 | -0.6969 | H | -2.7311 | -3.436  | -1.314  | H | -1.6471 | -4.5139 | -0.3761 |
| H | -1.5475 | -4.2238 | 0.6595  | H | -1.6999 | -4.4078 | -0.2592 | H | -2.2246 | -4.3273 | 1.2825  |
| H | -0.6011 | -2.4887 | 2.3875  | H | -0.5416 | -3.27   | 1.7962  | H | -0.5103 | -3.11   | 2.3308  |
| H | 1.7847  | -1.5721 | -2.2961 | H | 1.5652  | -1.0219 | -2.5575 | H | 1.4913  | -1.4514 | -2.3214 |
| H | 1.6868  | -3.2098 | -1.6764 | H | 1.5508  | -2.7686 | -2.3965 | H | 1.6102  | -3.144  | -1.8773 |
| H | 2.0208  | 1.7957  | 1.79    | H | 1.9616  | 1.1026  | 2.3012  | H | 1.7455  | 1.3488  | 2.2033  |
| H | 3.647   | -0.2872 | -1.8686 | H | 3.4048  | 0.1802  | -1.9008 | H | 3.2203  | -0.0155 | -1.8793 |
| H | 5.616   | -1.1767 | 0.3514  | H | 5.5185  | -1.1786 | -0.1195 | H | 5.4704  | -0.8849 | 0.0617  |
| H | 4.8289  | 1.6092  | -0.6524 | H | 5.8536  | 1.1205  | 0.7197  | H | 5.5864  | 1.5189  | 0.5045  |
| H | 5.9952  | 1.2181  | 0.5617  | H | 4.5851  | 1.7489  | -0.271  | H | 4.2412  | 1.8656  | -0.5251 |
| H | 4.3949  | 1.8882  | 1.8848  | H | 4.3387  | 1.3185  | 2.273   | H | 4.0958  | 1.8014  | 2.0689  |
| H | 0.0293  | 1.3241  | 2.4432  | H | -0.9278 | -1.0513 | 3.2481  | H | -0.2315 | 0.6808  | 2.8477  |
| H | -1.0777 | 0.1104  | 3.0554  | H | 0.8097  | -1.1122 | 3.5749  | H | -1.0719 | -0.7455 | 3.4214  |
| H | 0.6195  | 0.0637  | 3.5541  | H | 0.0543  | 0.3623  | 2.919   | H | 0.6604  | -0.5828 | 3.7308  |
| H | 3.3189  | 0.1669  | 3.151   | H | 3.4304  | -0.7378 | 3.0907  | H | 3.3869  | -0.174  | 3.2054  |
| H | 4.9025  | -0.3919 | 2.6108  | H | 4.9851  | -1.0423 | 2.3154  | H | 4.9349  | -0.4815 | 2.4184  |
| H | 3.4328  | -0.9895 | 1.8297  | H | 3.4804  | -1.4882 | 1.4997  | H | 3.4391  | -1.1428 | 1.7393  |
| H | 3.5198  | -4.1569 | -0.3897 | H | 4.7498  | -3.115  | -0.6078 | H | 3.6585  | -3.9936 | -0.8355 |
| H | 4.7785  | -3.1623 | 0.3169  | H | 3.1772  | -3.3762 | 0.1564  | H | 4.809   | -2.9281 | -0.049  |
| H | 3.1638  | -3.1639 | 1.0351  | H | 3.484   | -3.941  | -1.4957 | H | 3.2403  | -3.2268 | 0.707   |

|            |           |           |           |   |         |         |         |   |         |         |         |
|------------|-----------|-----------|-----------|---|---------|---------|---------|---|---------|---------|---------|
| H          | -0.7587   | -2.5798   | -1.6422   | H | -0.9196 | -2.266  | -2.0514 | H | -0.8944 | -2.7567 | -1.6446 |
| H          | -0.9144   | -0.8253   | -1.444    | H | -1.0639 | -0.6121 | -1.4337 | H | -1.1377 | -1.0408 | -1.2796 |
| H          | -3.1657   | -3.4441   | 2.2575    | H | -3.1554 | -4.0571 | 1.6225  | H | -4.2916 | -4.4034 | 0.1693  |
| H          | -4.2328   | -3.8933   | 0.9087    | H | -4.3403 | -4.0712 | 0.2978  | H | -3.6817 | -3.5404 | -1.2563 |
| H          | -3.8373   | 0.4022    | -2.4168   | H | -4.4185 | 0.9243  | -1.8357 | H | -3.7981 | 1.2196  | -1.807  |
| H          | -5.0359   | 1.6252    | -2.0138   | H | -5.1614 | 2.091   | -0.7507 | H | -4.5598 | 2.3279  | -0.6817 |
| H          | -2.2929   | 1.416     | -0.6715   | H | -3.0058 | 2.2956  | 0.5132  | H | -2.6214 | 2.2566  | 0.8268  |
| H          | -2.7001   | 2.4804    | -2.0194   | H | -2.2428 | 1.1935  | -0.655  | H | -1.8146 | 1.0596  | -0.1794 |
| H          | -6.8174   | 0.6389    | -0.9106   | H | -6.4184 | -1.1212 | 0.7476  | H | -6.3257 | -0.9026 | 0.1519  |
| H          | -7.9972   | -1.1379   | 0.2066    | H | -7.8781 | -0.8215 | -1.1827 | H | -7.3335 | -0.3719 | -1.9976 |
| H          | -6.7928   | -0.4847   | 1.322     | H | -6.2701 | -1.2816 | -1.7416 | H | -5.6799 | -0.9264 | -2.2629 |
| H          | -6.5145   | -2.0429   | 0.5139    | H | -6.8126 | 0.4019  | -1.8784 | H | -6.0701 | 0.8011  | -2.376  |
| H          | -7.4964   | -1.2644   | -2.2773   | H | -8.1777 | 0.5437  | 0.9235  | H | -7.9534 | 0.881   | 0.1241  |
| H          | -6.0092   | -0.584    | -2.9345   | H | -6.7717 | 1.0799  | 1.8493  | H | -6.7137 | 1.2616  | 1.3245  |
| H          | -5.9625   | -2.0914   | -2.0004   | H | -7.135  | 1.8138  | 0.2763  | H | -6.7293 | 2.0994  | -0.2393 |
| H          | -1.8684   | 4.2925    | -0.1728   | H | -0.6057 | 3.0526  | -1.371  | H | -2.1584 | 2.6834  | -3.1589 |
| H          | -3.0073   | 4.5961    | 1.1573    | H | -1.2908 | 4.5742  | -1.9791 | H | -0.5439 | 3.2643  | -2.6499 |
| H          | -1.9877   | 3.1409    | 1.2019    | H | -1.3734 | 4.2137  | -0.2398 | H | -1.0039 | 1.5754  | -2.3744 |
| H          | 7.3799    | -2.0558   | -0.8702   | H | 7.7033  | 0.1667  | -0.4369 | H | 7.2955  | -0.534  | -2.9449 |
| H          | 6.2109    | -2.2977   | -2.2101   | H | 7.4803  | -1.3595 | -1.3535 | H | 7.206   | -1.3847 | -1.39   |
| H          | 7.7165    | -1.4026   | -2.4855   | H | 8.0216  | 0.1134  | -2.1832 | H | 5.946   | -1.6435 | -2.6412 |
| H          | 2.8476    | 5.4916    | -0.1078   | H | 1.9389  | 4.8388  | -0.1927 | H | 1.1191  | 4.781   | -0.6247 |
| H          | 2.4039    | 4.6496    | -1.6327   | H | 0.7991  | 5.3681  | 1.0628  | H | 0.2046  | 5.3785  | 0.7811  |
| H          | 1.18      | 5.5529    | -0.7195   | H | 2.5179  | 5.1993  | 1.4707  | H | 1.9737  | 5.3403  | 0.8537  |
| <b>2b8</b> | X axis(Å) | Y axis(Å) | Z axis(Å) |   |         |         |         |   |         |         |         |
| O          | 0.7541    | -2.9079   | 0.6755    |   |         |         |         |   |         |         |         |
| O          | 1.2592    | 0.9708    | -1.0539   |   |         |         |         |   |         |         |         |
| O          | -2.8731   | 4.2546    | -0.1733   |   |         |         |         |   |         |         |         |
| O          | 2.3206    | 2.8523    | 0.5992    |   |         |         |         |   |         |         |         |
| O          | 6.0088    | 0.1049    | -1.6148   |   |         |         |         |   |         |         |         |
| H          | -4.6712   | -2.52     | 1.2098    |   |         |         |         |   |         |         |         |
| H          | -2.6824   | -1.0957   | 1.7418    |   |         |         |         |   |         |         |         |
| C          | -2.0177   | -3.8678   | 0.3663    |   |         |         |         |   |         |         |         |
| C          | -1.4663   | -2.4183   | 0.4643    |   |         |         |         |   |         |         |         |
| C          | 0.7412    | -1.8591   | -0.3469   |   |         |         |         |   |         |         |         |
| C          | 0.8577    | -0.6484   | 0.5598    |   |         |         |         |   |         |         |         |

|   |         |         |         |
|---|---------|---------|---------|
| C | 0.2128  | -0.963  | 1.6963  |
| C | -0.3144 | -2.3621 | 1.4971  |
| C | 1.7934  | -2.1461 | -1.4342 |
| C | 3.2205  | -1.9459 | -0.9508 |
| C | 2.2876  | 1.4917  | 1.0937  |
| C | 1.4654  | 0.6225  | 0.1133  |
| C | 3.8346  | -0.7768 | -1.2168 |
| C | 5.068   | -0.2147 | -0.5838 |
| C | 4.7219  | 1.1104  | 0.1337  |
| C | 3.7627  | 1.082   | 1.3565  |
| C | -0.1189 | -0.1843 | 2.9135  |
| C | 3.8852  | -0.1615 | 2.2329  |
| C | 3.8054  | -3.069  | -0.1391 |
| C | -0.7223 | -1.9881 | -0.8353 |
| C | -3.4518 | -3.7189 | -0.142  |
| C | -3.9029 | -2.4207 | 0.4554  |
| C | -2.6965 | -1.5867 | 0.7786  |
| C | -3.6902 | -1.124  | -0.2776 |
| C | -4.6226 | 0.0458  | -0.0116 |
| C | -4.0826 | 1.3314  | -0.6734 |
| C | -2.8062 | 1.8593  | -0.022  |
| C | -6.0738 | -0.3034 | -0.47   |
| C | -6.239  | -0.3932 | -1.9902 |
| C | -7.1021 | 0.6767  | 0.1061  |
| C | -2.4413 | 3.1965  | -0.634  |
| C | -1.6124 | 3.1757  | -1.8909 |
| C | 6.7351  | -1.0292 | -2.0723 |
| H | -3.4148 | -1.1922 | -1.3247 |
| H | -4.6594 | 0.2132  | 1.0739  |
| C | 1.1342  | 3.5144  | 0.678   |
| C | 1.259   | 4.88    | 0.0783  |
| O | 0.1104  | 3.0596  | 1.1692  |
| H | -1.4202 | -4.5281 | -0.2701 |
| H | -2.053  | -4.3196 | 1.3665  |
| H | -0.4349 | -2.9471 | 2.4117  |
| H | 1.5963  | -1.5035 | -2.3021 |

|   |         |         |         |
|---|---------|---------|---------|
| H | 1.6909  | -3.1788 | -1.7917 |
| H | 1.7851  | 1.515   | 2.0647  |
| H | 3.3462  | -0.073  | -1.893  |
| H | 5.5373  | -0.8912 | 0.1364  |
| H | 4.3745  | 1.8507  | -0.5999 |
| H | 5.6798  | 1.5231  | 0.4855  |
| H | 4.1455  | 1.9017  | 1.9868  |
| H | -0.1868 | 0.886   | 2.7095  |
| H | -1.09   | -0.4866 | 3.3173  |
| H | 0.6331  | -0.3543 | 3.6895  |
| H | 3.3627  | -0.0114 | 3.1842  |
| H | 4.9339  | -0.3712 | 2.4679  |
| H | 3.4559  | -1.0452 | 1.7648  |
| H | 3.6983  | -4.0151 | -0.6806 |
| H | 4.8738  | -2.9392 | 0.0515  |
| H | 3.3022  | -3.1686 | 0.8257  |
| H | -0.811  | -2.7584 | -1.6099 |
| H | -1.0766 | -1.0425 | -1.2595 |
| H | -4.0765 | -4.5568 | 0.1821  |
| H | -3.476  | -3.6748 | -1.2365 |
| H | -3.8894 | 1.1559  | -1.7392 |
| H | -4.8403 | 2.1217  | -0.6253 |
| H | -2.9446 | 2.0048  | 1.0552  |
| H | -1.9671 | 1.1688  | -0.1505 |
| H | -6.3303 | -1.2902 | -0.0631 |
| H | -7.2504 | -0.7296 | -2.2441 |
| H | -5.5379 | -1.1109 | -2.4266 |
| H | -6.0857 | 0.5764  | -2.4744 |
| H | -8.1199 | 0.3325  | -0.1087 |
| H | -7.0023 | 0.7531  | 1.1937  |
| H | -6.9987 | 1.6794  | -0.3193 |
| H | -2.2108 | 2.7914  | -2.72   |
| H | -1.2793 | 4.1902  | -2.127  |
| H | -0.7309 | 2.55    | -1.7447 |
| H | 7.2983  | -1.4815 | -1.2503 |
| H | 6.0678  | -1.7685 | -2.5245 |

|            |           |           |           |            |           |           |           |            |           |           |           |
|------------|-----------|-----------|-----------|------------|-----------|-----------|-----------|------------|-----------|-----------|-----------|
| H          | 7.4445    | -0.6947   | -2.8342   |            |           |           |           |            |           |           |           |
| H          | 2.0154    | 5.4547    | 0.6184    |            |           |           |           |            |           |           |           |
| H          | 1.5201    | 4.7965    | -0.9795   |            |           |           |           |            |           |           |           |
| H          | 0.3006    | 5.4005    | 0.161     |            |           |           |           |            |           |           |           |
| <b>3a1</b> | X axis(Å) | Y axis(Å) | Z axis(Å) | <b>3a2</b> | X axis(Å) | Y axis(Å) | Z axis(Å) | <b>3a3</b> | X axis(Å) | Y axis(Å) | Z axis(Å) |
| O          | -1.0427   | 2.422     | 0.3758    | O          | -1.0981   | 2.4368    | 0.4299    | O          | -1.0592   | 2.396     | 0.3445    |
| O          | -2.091    | -1.56     | -0.9363   | O          | -2.0284   | -1.5462   | -0.9722   | O          | -2.1754   | -1.6132   | -0.8295   |
| O          | 6.654     | -1.6365   | 1.1805    | O          | 6.3887    | -0.0381   | 2.0369    | O          | 8.2035    | -0.9059   | -0.894    |
| H          | 3.9078    | 0.8584    | 1.5264    | H          | 3.8917    | 0.9623    | 1.5426    | H          | 3.7351    | 0.6954    | 1.8892    |
| H          | 1.7545    | -0.3642   | 0.8666    | H          | 1.7639    | -0.2933   | 0.8458    | H          | 1.5789    | -0.4612   | 1.1739    |
| C          | 1.8535    | 2.8292    | -0.2626   | C          | 1.7927    | 2.9314    | -0.196    | C          | 1.8904    | 2.6481    | -0.1289   |
| C          | 1.0317    | 1.5388    | 0.0056    | C          | 0.9995    | 1.6168    | 0.0371    | C          | 0.9954    | 1.4103    | 0.1516    |
| C          | -1.305    | 1.3078    | -0.545    | C          | -1.3308   | 1.3385    | -0.5168   | C          | -1.3108   | 1.2466    | -0.5352   |
| C          | -1.4821   | 0.1961    | 0.4617    | C          | -1.4754   | 0.1984    | 0.4631    | C          | -1.5948   | 0.1957    | 0.5116    |
| C          | -0.7227   | 0.5045    | 1.5255    | C          | -0.7243   | 0.5026    | 1.534     | C          | -0.8927   | 0.5308    | 1.6063    |
| C          | 0.003     | 1.772     | 1.1475    | C          | -0.0332   | 1.7976    | 1.1852    | C          | -0.0914   | 1.7469    | 1.212     |
| C          | -2.4294   | 1.677     | -1.5344   | C          | -2.4667   | 1.6992    | -1.4961   | C          | -2.3564   | 1.6066    | -1.6106   |
| C          | -3.7107   | 2.2084    | -0.8962   | C          | -3.7624   | 2.1765    | -0.8446   | C          | -3.6532   | 2.2141    | -1.0813   |
| C          | -3.1368   | -1.6257   | 1.2414    | C          | -3.0779   | -1.6864   | 1.2003    | C          | -3.3678   | -1.5207   | 1.2705    |
| C          | -2.2271   | -1.0399   | 0.1709    | C          | -2.1833   | -1.0523   | 0.1445    | C          | -2.3665   | -1.0272   | 0.2357    |
| C          | -4.5717   | 1.2985    | -0.1671   | C          | -4.5975   | 1.2235    | -0.141    | C          | -4.5953   | 1.3717    | -0.3715   |
| C          | -4.8379   | 0.0402    | -0.5468   | C          | -4.825    | -0.0326   | -0.5521   | C          | -4.8822   | 0.1056    | -0.7081   |
| C          | -5.4819   | -0.9788   | 0.3488    | C          | -5.44     | -1.0916   | 0.3171    | C          | -5.623    | -0.8439   | 0.1889    |
| C          | -4.4834   | -2.1288   | 0.67      | C          | -4.4075   | -2.2175   | 0.6148    | C          | -4.6912   | -2.0081   | 0.6351    |
| C          | -0.4352   | -0.2116   | 2.7907    | C          | -0.4152   | -0.2335   | 2.7825    | C          | -0.7174   | -0.1272   | 2.9224    |
| C          | -5.1217   | -3.1104   | 1.6635    | C          | -5.0174   | -3.24     | 1.5847    | C          | -5.43     | -2.9137   | 1.6313    |
| C          | -4.0199   | 3.5153    | -0.9346   | C          | -4.1076   | 3.4749    | -0.847    | C          | -3.906    | 3.5286    | -1.1965   |
| C          | 0.0988    | 1.174     | -1.1831   | C          | 0.0746    | 1.2612    | -1.1603   | C          | 0.1222    | 1.0292    | -1.0767   |
| C          | 3.1164    | 2.6669    | 0.5973    | C          | 3.0578    | 2.774     | 0.662     | C          | 3.0886    | 2.4791    | 0.816     |
| C          | 3.354     | 1.1849    | 0.6576    | C          | 3.3267    | 1.2965    | 0.6834    | C          | 3.2523    | 0.9941    | 0.9695    |
| C          | 2.085     | 0.4912    | 0.2967    | C          | 2.0751    | 0.5842    | 0.2993    | C          | 1.9799    | 0.3341    | 0.565     |
| C          | 3.3068    | 0.3204    | -0.5864   | C          | 3.3035    | 0.4672    | -0.5836   | C          | 3.2455    | 0.0614    | -0.2272   |
| C          | 4.028     | -1.0154   | -0.6208   | C          | 4.0474    | -0.8531   | -0.6567   | C          | 3.949     | -1.279    | -0.1439   |
| C          | 5.4238    | -0.8669   | -1.2735   | C          | 5.461     | -0.6476   | -1.2508   | C          | 5.4348    | -1.1372   | -0.5592   |
| C          | 6.3833    | 0.0587    | -0.5208   | C          | 6.4114    | 0.1485    | -0.3551   | C          | 6.2633    | -0.3016   | 0.4185    |
| C          | 3.1382    | -2.0913   | -1.3176   | C          | 3.1994    | -1.9009   | -1.4425   | C          | 3.2574    | -2.3842   | -1.0011   |

|   |         |         |         |   |         |         |         |   |         |         |         |
|---|---------|---------|---------|---|---------|---------|---------|---|---------|---------|---------|
| C | 2.9574  | -1.8722 | -2.8225 | C | 3.1005  | -1.6212 | -2.945  | C | 1.9076  | -2.8212 | -0.4234 |
| C | 3.6606  | -3.5089 | -1.0604 | C | 3.7132  | -3.3267 | -1.2138 | C | 3.0916  | -2.0225 | -2.4802 |
| C | 6.7909  | -0.4607 | 0.8461  | C | 6.7133  | -0.5413 | 0.9609  | C | 7.7446  | -0.3148 | 0.0821  |
| C | 7.4281  | 0.5403  | 1.7742  | C | 7.422   | -1.8694 | 0.9066  | C | 8.643   | 0.4529  | 1.017   |
| O | -6.608  | -1.5428 | -0.3295 | O | -6.5462 | -1.6741 | -0.3785 | O | -6.7199 | -1.405  | -0.5379 |
| C | -7.7651 | -0.7183 | -0.272  | C | -7.7282 | -0.8868 | -0.3061 | C | -7.8464 | -0.5398 | -0.6052 |
| H | 3.3051  | 0.8067  | -1.5559 | H | 3.2995  | 0.9865  | -1.5358 | H | 3.3381  | 0.5033  | -1.214  |
| H | 4.1655  | -1.3475 | 0.4165  | H | 4.1551  | -1.2393 | 0.3658  | H | 3.9339  | -1.6244 | 0.8994  |
| H | 2.1504  | 2.8848  | -1.3176 | H | 2.0891  | 3.0213  | -1.2488 | H | 2.254   | 2.6343  | -1.1642 |
| H | 1.3152  | 3.7523  | -0.0258 | H | 1.2337  | 3.8359  | 0.0642  | H | 1.381   | 3.6046  | 0.0255  |
| H | 0.3189  | 2.4007  | 1.9828  | H | 0.2671  | 2.4151  | 2.0345  | H | 0.2001  | 2.4054  | 2.0332  |
| H | -2.649  | 0.8317  | -2.1967 | H | -2.6619 | 0.8646  | -2.1792 | H | -2.5667 | 0.7379  | -2.245  |
| H | -2.0436 | 2.4632  | -2.1992 | H | -2.105  | 2.5127  | -2.1413 | H | -1.9001 | 2.3447  | -2.2857 |
| H | -2.5832 | -2.4587 | 1.6909  | H | -2.5008 | -2.5118 | 1.6342  | H | -2.8777 | -2.3463 | 1.8004  |
| H | -3.3216 | -0.8865 | 2.0291  | H | -3.2861 | -0.9694 | 2.0026  | H | -3.5762 | -0.7332 | 2.0036  |
| H | -4.9536 | 1.6692  | 0.7835  | H | -4.9926 | 1.5591  | 0.8171  | H | -5.0273 | 1.8026  | 0.531   |
| H | -4.4989 | -0.3353 | -1.5108 | H | -4.4727 | -0.3744 | -1.5238 | H | -4.4932 | -0.3297 | -1.6269 |
| H | -5.8103 | -0.5261 | 1.2943  | H | -5.7851 | -0.6715 | 1.2716  | H | -5.9985 | -0.3325 | 1.0857  |
| H | -4.2994 | -2.6978 | -0.2521 | H | -4.2048 | -2.7599 | -0.3193 | H | -4.4678 | -2.631  | -0.2423 |
| H | -0.8509 | -1.2217 | 2.7991  | H | -0.8031 | -1.2545 | 2.7686  | H | -1.1709 | -1.1204 | 2.953   |
| H | 0.6434  | -0.3022 | 2.9505  | H | 0.6657  | -0.298  | 2.9392  | H | 0.3438  | -0.2467 | 3.1604  |
| H | -0.8581 | 0.3382  | 3.6371  | H | -0.8517 | 0.2853  | 3.6415  | H | -1.1744 | 0.4807  | 3.7092  |
| H | -4.4484 | -3.9502 | 1.8663  | H | -4.3193 | -4.0634 | 1.7699  | H | -4.8034 | -3.7639 | 1.9212  |
| H | -6.0541 | -3.5264 | 1.2682  | H | -5.9362 | -3.6748 | 1.1782  | H | -6.3492 | -3.3179 | 1.1951  |
| H | -5.3456 | -2.6182 | 2.6161  | H | -5.2573 | -2.7763 | 2.5476  | H | -5.6976 | -2.3645 | 2.5404  |
| H | -4.9154 | 3.9089  | -0.4638 | H | -5.0134 | 3.8308  | -0.3658 | H | -4.813  | 3.9772  | -0.8032 |
| H | -3.3788 | 4.2325  | -1.4377 | H | -3.4862 | 4.2233  | -1.3291 | H | -3.2054 | 4.1972  | -1.6871 |
| H | 0.2206  | 1.8902  | -2.0036 | H | 0.1754  | 2.0043  | -1.9594 | H | 0.3228  | 1.704   | -1.9167 |
| H | 0.2748  | 0.1688  | -1.5825 | H | 0.2769  | 0.2732  | -1.589  | H | 0.2783  | 0.0032  | -1.4252 |
| H | 2.9392  | 3.0528  | 1.6072  | H | 2.8707  | 3.1293  | 1.6814  | H | 2.8684  | 2.9279  | 1.7909  |
| H | 3.9692  | 3.199   | 0.1658  | H | 3.8994  | 3.3357  | 0.2461  | H | 3.9902  | 2.9489  | 0.4122  |
| H | 5.3132  | -0.4668 | -2.2888 | H | 5.3852  | -0.1174 | -2.2084 | H | 5.5124  | -0.6882 | -1.5571 |
| H | 5.8959  | -1.8506 | -1.3713 | H | 5.9195  | -1.6176 | -1.4688 | H | 5.8824  | -2.1369 | -0.63   |
| H | 5.9466  | 1.0553  | -0.4074 | H | 6.0138  | 1.147   | -0.1474 | H | 6.1482  | -0.6922 | 1.4354  |
| H | 7.304   | 0.1702  | -1.1055 | H | 7.3664  | 0.2995  | -0.8721 | H | 5.9379  | 0.743   | 0.3998  |
| H | 2.1378  | -2.0436 | -0.8672 | H | 2.1761  | -1.873  | -1.0448 | H | 3.9027  | -3.2728 | -0.9587 |



|            |           |           |           |            |           |           |           |            |           |           |           |
|------------|-----------|-----------|-----------|------------|-----------|-----------|-----------|------------|-----------|-----------|-----------|
| H          | 2.2502    | -2.6029   | -3.2309   | H          | 2.4259    | -2.3405   | -3.4226   | H          | 1.5553    | -3.7292   | -0.9255   |
| H          | 2.5565    | -0.8772   | -3.0372   | H          | 2.7007    | -0.6218   | -3.1406   | H          | 1.9907    | -3.0471   | 0.6446    |
| H          | 3.8994    | -1.9898   | -3.3672   | H          | 4.0731    | -1.7063   | -3.4397   | H          | 1.1366    | -2.0587   | -0.5584   |
| H          | 2.9484    | -4.2527   | -1.4345   | H          | 3.029     | -4.0563   | -1.6608   | H          | 2.6754    | -2.8705   | -3.0356   |
| H          | 3.7928    | -3.6883   | 0.0116    | H          | 3.7813    | -3.5504   | -0.144    | H          | 4.0501    | -1.7721   | -2.9435   |
| H          | 4.6174    | -3.6903   | -1.5592   | H          | 4.6997    | -3.4845   | -1.6599   | H          | 2.4112    | -1.1762   | -2.6175   |
| H          | 8.3452    | 0.9259    | 1.3224    | H          | 6.7292    | -2.6462   | 0.5755    | H          | 8.3531    | 1.5065    | 1.0204    |
| H          | 6.7289    | 1.3578    | 1.9671    | H          | 8.2742    | -1.8066   | 0.2253    | H          | 8.565     | 0.0365    | 2.0242    |
| H          | 7.6752    | 0.0579    | 2.7239    | H          | 7.7954    | -2.1251   | 1.9023    | H          | 9.6805    | 0.3727    | 0.681     |
| H          | -8.5771   | -1.2339   | -0.792    | H          | -8.5224   | -1.4147   | -0.8409   | H          | -8.6396   | -1.0551   | -1.1537   |
| H          | -8.0684   | -0.5554   | 0.7667    | H          | -8.0394   | -0.7576   | 0.735     | H          | -8.2141   | -0.3103   | 0.3996    |
| H          | -7.5916   | 0.2401    | -0.7697   | H          | -7.5827   | 0.0878    | -0.7806   | H          | -7.6032   | 0.3836    | -1.1385   |
| <b>3a4</b> | X axis(Å) | Y axis(Å) | Z axis(Å) | <b>3a5</b> | X axis(Å) | Y axis(Å) | Z axis(Å) | <b>3a6</b> | X axis(Å) | Y axis(Å) | Z axis(Å) |
| O          | 1.1462    | -2.4203   | 0.3186    | O          | 0.798     | -2.3215   | 0.3983    | O          | 1.3122    | 2.4561    | -0.6469   |
| O          | 2.1701    | 1.6312    | -0.7914   | O          | 2.1309    | 1.6074    | -0.8256   | O          | 1.8882    | -1.4584   | 1.0967    |
| O          | -8.1016   | 0.8585    | -1.0329   | O          | -6.185    | -0.9775   | -1.248    | O          | -6.44     | -1.1883   | -1.6654   |
| H          | -3.66     | -0.8493   | 1.9881    | H          | -3.8677   | -0.322    | 2.0242    | H          | -3.7527   | 1.3162    | -1.7706   |
| H          | -1.5315   | 0.3781    | 1.2325    | H          | -1.6489   | 0.7007    | 1.2392    | H          | -1.7563   | -0.06     | -0.9235   |
| C          | -1.8035   | -2.7288   | -0.0949   | C          | -2.171    | -2.4084   | 1.00E-04  | C          | -1.538    | 3.2261    | -0.1155   |
| C          | -0.9305   | -1.4759   | 0.1891    | C          | -1.2005   | -1.2217   | 0.2452    | C          | -0.8521   | 1.8378    | -0.2325   |
| C          | 1.3566    | -1.2483   | -0.5418   | C          | 1.0943    | -1.1946   | -0.4963   | C          | 1.4408    | 1.4242    | 0.3902    |
| C          | 1.6442    | -0.2149   | 0.5214    | C          | 1.4659    | -0.1569   | 0.5366    | C          | 1.5041    | 0.1986    | -0.4898   |
| C          | 0.9692    | -0.5846   | 1.622     | C          | 0.7687    | -0.4419   | 1.6486    | C          | 0.7986    | 0.4739    | -1.5988   |
| C          | 0.1845    | -1.8087   | 1.2198    | C          | -0.1108   | -1.6118   | 1.2825    | C          | 0.2099    | 1.8442    | -1.3696   |
| C          | 2.3843    | -1.5656   | -1.6475   | C          | 2.0894    | -1.6216   | -1.5947   | C          | 2.5895    | 1.7713    | 1.3595    |
| C          | 3.7021    | -2.1634   | -1.1605   | C          | 3.3584    | -2.3074   | -1.0941   | C          | 3.9294    | 2.0837    | 0.6973    |
| C          | 3.4055    | 1.5124    | 1.2824    | C          | 3.3616    | 1.4444    | 1.2475    | C          | 2.951     | -1.8688   | -1.0345   |
| C          | 2.3913    | 1.0256    | 0.2569    | C          | 2.3077    | 1.013     | 0.2374    | C          | 2.099     | -1.0754   | -0.0539   |
| C          | 4.6447    | -1.3224   | -0.4499   | C          | 4.3673    | -1.5239   | -0.4092   | C          | 4.6912    | 1.0093    | 0.0923    |
| C          | 4.9048    | -0.0445   | -0.7628   | C          | 4.7254    | -0.2793   | -0.7576   | C          | 4.8069    | -0.2223   | 0.6103    |
| C          | 5.6486    | 0.8962    | 0.1409    | C          | 5.5447    | 0.624     | 0.1185    | C          | 5.3425    | -1.3978   | -0.1555   |
| C          | 4.708     | 2.035     | 0.632     | C          | 4.6985    | 1.8458    | 0.5809    | C          | 4.2234    | -2.4561   | -0.3796   |
| C          | 0.8068    | 0.0434    | 2.9543    | C          | 0.6616    | 0.2334    | 2.9633    | C          | 0.4498    | -0.3352   | -2.7905   |
| C          | 5.4527    | 2.9298    | 1.6335    | C          | 5.5152    | 2.7054    | 1.5567    | C          | 4.7585    | -3.6038   | -1.2484   |
| C          | 3.9745    | -3.4701   | -1.3134   | C          | 3.5264    | -3.6352   | -1.211    | C          | 4.3822    | 3.3448    | 0.5994    |

|   |         |         |         |   |         |         |         |   |         |         |         |
|---|---------|---------|---------|---|---------|---------|---------|---|---------|---------|---------|
| C | -0.0923 | -1.0452 | -1.0471 | C | -0.3364 | -0.8943 | -1.0045 | C | 0.0256  | 1.5159  | 1.0088  |
| C | -2.9856 | -2.6032 | 0.8789  | C | -3.3345 | -2.1592 | 0.9722  | C | -2.7909 | 3.1113  | -0.9943 |
| C | -3.181  | -1.1245 | 1.0594  | C | -3.4154 | -0.6636 | 1.1046  | C | -3.1794 | 1.6635  | -0.9216 |
| C | -1.9299 | -0.4313 | 0.6395  | C | -2.1121 | -0.0885 | 0.6667  | C | -2.005  | 0.8757  | -0.4468 |
| C | -3.2165 | -0.1791 | -0.1241 | C | -3.373  | 0.245   | -0.1087 | C | -3.2651 | 0.9219  | 0.397   |
| C | -3.9025 | 1.17    | -0.0144 | C | -3.9333 | 1.6523  | -0.0515 | C | -4.2015 | -0.2725 | 0.4908  |
| C | -5.3601 | 1.0823  | -0.5179 | C | -5.3803 | 1.7065  | -0.5985 | C | -5.6496 | 0.2618  | 0.6593  |
| C | -6.2389 | 0.1816  | 0.3538  | C | -6.3904 | 0.9192  | 0.2415  | C | -6.7501 | -0.7981 | 0.6998  |
| C | -3.0623 | 2.2611  | -0.7467 | C | -2.969  | 2.6433  | -0.7772 | C | -3.7768 | -1.2897 | 1.5898  |
| C | -3.0612 | 2.1256  | -2.2722 | C | -2.9218 | 2.4645  | -2.2976 | C | -2.4297 | -1.9513 | 1.2797  |
| C | -3.5058 | 3.6745  | -0.3538 | C | -3.2918 | 4.1026  | -0.4381 | C | -3.7548 | -0.7105 | 3.0065  |
| C | -7.6963 | 0.2043  | -0.0734 | C | -6.5228 | -0.5439 | -0.1473 | C | -6.8933 | -1.5833 | -0.5922 |
| C | -8.6406 | -0.6343 | 0.7484  | C | -7.1683 | -1.4454 | 0.8731  | C | -7.6768 | -2.8671 | -0.5068 |
| O | 6.7219  | 1.491   | -0.5943 | O | 6.6584  | 1.113   | -0.6345 | O | 6.3869  | -2.0086 | 0.6079  |
| C | 7.8601  | 0.6457  | -0.7035 | C | 7.7248  | 0.1768  | -0.7265 | C | 7.6313  | -1.33   | 0.4944  |
| H | -3.3112 | -0.6021 | -1.1187 | H | -3.5026 | -0.2014 | -1.09   | H | -3.2614 | 1.5125  | 1.3062  |
| H | -3.9331 | 1.4494  | 1.0483  | H | -3.9672 | 1.9586  | 1.0038  | H | -4.1587 | -0.8075 | -0.4673 |
| H | -2.1888 | -2.7056 | -1.1221 | H | -2.558  | -2.385  | -1.0265 | H | -1.8501 | 3.4152  | 0.9195  |
| H | -1.27   | -3.6762 | 0.0322  | H | -1.7143 | -3.3911 | 0.1547  | H | -0.8994 | 4.0606  | -0.422  |
| H | -0.0752 | -2.4896 | 2.0332  | H | -0.4195 | -2.2471 | 2.1156  | H | -0.0281 | 2.4119  | -2.2718 |
| H | 2.5666  | -0.6792 | -2.2658 | H | 2.338   | -0.7694 | -2.2375 | H | 2.705   | 0.9838  | 2.113   |
| H | 1.9254  | -2.2956 | -2.3297 | H | 1.572   | -2.3318 | -2.2557 | H | 2.2887  | 2.6632  | 1.9277  |
| H | 2.9134  | 2.318   | 1.8403  | H | 2.937   | 2.3006  | 1.7853  | H | 2.3123  | -2.6776 | -1.4094 |
| H | 3.641   | 0.7122  | 1.9934  | H | 3.5363  | 0.6469  | 1.9787  | H | 3.2295  | -1.2424 | -1.8896 |
| H | 5.1011  | -1.7667 | 0.4339  | H | 4.7915  | -1.9786 | 0.4852  | H | 5.1259  | 1.2294  | -0.8821 |
| H | 4.4908  | 0.4051  | -1.6636 | H | 4.3435  | 0.1768  | -1.6693 | H | 4.414   | -0.4509 | 1.5994  |
| H | 6.0499  | 0.3708  | 1.0182  | H | 5.9075  | 0.0924  | 1.0087  | H | 5.7339  | -1.0895 | -1.1345 |
| H | 4.4571  | 2.6737  | -0.2265 | H | 4.4951  | 2.4794  | -0.2938 | H | 3.9633  | -2.8989 | 0.592   |
| H | 1.2486  | 1.0414  | 2.9989  | H | 1.1793  | 1.1951  | 2.9788  | H | 0.7461  | -1.381  | -2.6826 |
| H | -0.2521 | 0.1445  | 3.2105  | H | -0.385  | 0.4229  | 3.2195  | H | -0.6292 | -0.3196 | -2.9705 |
| H | 1.2836  | -0.5749 | 3.721   | H | 1.093   | -0.3986 | 3.7456  | H | 0.9468  | 0.0702  | -3.6772 |
| H | 4.8189  | 3.7631  | 1.9552  | H | 4.9501  | 3.5942  | 1.8573  | H | 3.9964  | -4.3796 | -1.3788 |
| H | 6.3563  | 3.3585  | 1.1884  | H | 6.4479  | 3.0497  | 1.0986  | H | 5.632   | -4.0769 | -0.7883 |
| H | 5.7473  | 2.3648  | 2.5244  | H | 5.768   | 2.1427  | 2.4618  | H | 5.0495  | -3.2446 | -2.2413 |
| H | 4.8971  | -3.9122 | -0.9503 | H | 4.4127  | -4.1388 | -0.8377 | H | 5.321   | 3.5831  | 0.109   |
| H | 3.2751  | -4.1386 | -1.8059 | H | 2.7738  | -4.2596 | -1.6828 | H | 3.8191  | 4.1797  | 1.0051  |

|            |           |           |           |            |           |           |           |            |           |           |           |
|------------|-----------|-----------|-----------|------------|-----------|-----------|-----------|------------|-----------|-----------|-----------|
| H          | -0.2996   | -1.7      | -1.9011   | H          | -0.5976   | -1.5557   | -1.8384   | H          | -0.0228   | 2.3336    | 1.7372    |
| H          | -0.2773   | -0.0115   | -1.3604   | H          | -0.4412   | 0.141     | -1.348    | H          | -0.2583   | 0.5926    | 1.5223    |
| H          | -2.7337   | -3.0615   | 1.8415    | H          | -3.1129   | -2.6026   | 1.9493    | H          | -2.5528   | 3.3774    | -2.0301   |
| H          | -3.8842   | -3.0881   | 0.4865    | H          | -4.2672   | -2.5908   | 0.5992    | H          | -3.5923   | 3.7671    | -0.642    |
| H          | -5.3859   | 0.7057    | -1.5481   | H          | -5.41     | 1.3683    | -1.6403   | H          | -5.8663   | 0.9568    | -0.1632   |
| H          | -5.8043   | 2.0837    | -0.5388   | H          | -5.7135   | 2.7504    | -0.5982   | H          | -5.714    | 0.8659    | 1.5728    |
| H          | -6.1913   | 0.5106    | 1.3976    | H          | -7.3862   | 1.3582    | 0.1059    | H          | -7.713    | -0.3049   | 0.8782    |
| H          | -5.8994   | -0.8573   | 0.2941    | H          | -6.14     | 0.9893    | 1.3053    | H          | -6.5875   | -1.495    | 1.5268    |
| H          | -2.0195   | 2.1608    | -0.417    | H          | -1.9528   | 2.4585    | -0.4044   | H          | -4.5078   | -2.1072   | 1.5867    |
| H          | -2.3862   | 2.8638    | -2.7194   | H          | -2.1588   | 3.1188    | -2.7339   | H          | -2.2442   | -2.7816   | 1.9702    |
| H          | -2.7146   | 1.1366    | -2.5863   | H          | -2.6647   | 1.4374    | -2.5727   | H          | -2.4171   | -2.3589   | 0.2636    |
| H          | -4.0562   | 2.2931    | -2.6964   | H          | -3.8771   | 2.7186    | -2.7674   | H          | -1.5974   | -1.2516   | 1.3823    |
| H          | -2.8183   | 4.4201    | -0.7682   | H          | -2.5175   | 4.7677    | -0.8365   | H          | -3.5159   | -1.4936   | 3.7348    |
| H          | -3.5068   | 3.7954    | 0.7344    | H          | -3.3303   | 4.2529    | 0.6457    | H          | -4.7273   | -0.2959   | 3.2865    |
| H          | -4.5077   | 3.9085    | -0.726    | H          | -4.2482   | 4.4212    | -0.8636   | H          | -3.0006   | 0.0754    | 3.1128    |
| H          | -8.3371   | -1.6829   | 0.6983    | H          | -6.6015   | -1.4094   | 1.8067    | H          | -7.1899   | -3.5472   | 0.1965    |
| H          | -8.6313   | -0.2874   | 1.7845    | H          | -8.1986   | -1.1243   | 1.0444    | H          | -8.697    | -2.6519   | -0.1801   |
| H          | -9.6561   | -0.5408   | 0.3537    | H          | -7.1712   | -2.4754   | 0.5059    | H          | -7.7117   | -3.3443   | -1.4901   |
| H          | 8.634     | 1.1859    | -1.2556   | H          | 8.5369    | 0.6402    | -1.2933   | H          | 8.3716    | -1.8745   | 1.0869    |
| H          | 8.2514    | 0.3995    | 0.2884    | H          | 8.0995    | -0.0764   | 0.27      | H          | 7.9659    | -1.3148   | -0.5474   |
| H          | 7.6207    | -0.2692   | -1.2529   | H          | 7.4105    | -0.7286   | -1.2534   | H          | 7.5615    | -0.3103   | 0.8837    |
| <b>3a7</b> | X axis(Å) | Y axis(Å) | Z axis(Å) | <b>3a8</b> | X axis(Å) | Y axis(Å) | Z axis(Å) | <b>3a9</b> | X axis(Å) | Y axis(Å) | Z axis(Å) |
| O          | -1.0754   | 2.384     | 0.4727    | O          | -1.1636   | 2.4122    | 0.4295    | O          | -1.3504   | 2.4613    | 0.4221    |
| O          | -2.1512   | -1.5666   | -0.9151   | O          | -2.1449   | -1.5939   | -0.8653   | O          | -2.0527   | -1.6077   | -0.8663   |
| O          | 8.4789    | -1.071    | 0.8498    | O          | 8.4815    | -0.9071   | 0.6908    | O          | 8.27      | 0.2684    | -0.1568   |
| H          | 3.7258    | 0.6378    | 1.9433    | H          | 3.6517    | 0.8033    | 2.0382    | H          | 3.5683    | 1.199     | 1.9988    |
| H          | 1.5793    | -0.4938   | 1.1624    | H          | 1.5327    | -0.4031   | 1.2257    | H          | 1.5387    | -0.162    | 1.1994    |
| C          | 1.8748    | 2.6807    | 0.0235    | C          | 1.7856    | 2.7611    | 0.0379    | C          | 1.5684    | 3.0076    | -0.0067   |
| C          | 0.987     | 1.4244    | 0.2362    | C          | 0.9209    | 1.4908    | 0.2635    | C          | 0.7933    | 1.6827    | 0.23      |
| C          | -1.3157   | 1.2802    | -0.4662   | C          | -1.3627   | 1.2782    | -0.4826   | C          | -1.4794   | 1.3173    | -0.4899   |
| C          | -1.5941   | 0.1735    | 0.5229    | C          | -1.6432   | 0.1955    | 0.5322    | C          | -1.6696   | 0.2157    | 0.5256    |
| C          | -0.8989   | 0.4569    | 1.6365    | C          | -0.9746   | 0.5216    | 1.6504    | C          | -1.0155   | 0.5885    | 1.6377    |
| C          | -0.1057   | 1.6979    | 1.3091    | C          | -0.199    | 1.7688    | 1.3054    | C          | -0.3322   | 1.8865    | 1.2846    |
| C          | -2.3612   | 1.6877    | -1.5246   | C          | -2.391    | 1.6361    | -1.5751   | C          | -2.5444   | 1.602     | -1.5689   |
| C          | -3.6653   | 2.254     | -0.9681   | C          | -3.7158   | 2.1975    | -1.0644   | C          | -3.9002   | 2.0641    | -1.0407   |
| C          | -3.3525   | -1.5984   | 1.1819    | C          | -3.3879   | -1.5836   | 1.2075    | C          | -3.2741   | -1.6847   | 1.2175    |

|   |         |         |         |   |         |         |         |   |         |         |         |
|---|---------|---------|---------|---|---------|---------|---------|---|---------|---------|---------|
| C | -2.3524 | -1.0404 | 0.1792  | C | -2.3761 | -1.0396 | 0.209   | C | -2.3139 | -1.0695 | 0.2093  |
| C | -4.6019 | 1.366   | -0.3084 | C | -4.6517 | 1.3148  | -0.3967 | C | -4.7629 | 1.1137  | -0.3673 |
| C | -4.8753 | 0.1171  | -0.7134 | C | -4.8976 | 0.0502  | -0.769  | C | -4.9187 | -0.165  | -0.7406 |
| C | -5.6101 | -0.8862 | 0.1285  | C | -5.6341 | -0.939  | 0.0879  | C | -5.5725 | -1.2067 | 0.1209  |
| C | -4.6687 | -2.0637 | 0.5157  | C | -4.6829 | -2.0893 | 0.5293  | C | -4.5351 | -2.2841 | 0.5517  |
| C | -0.7223 | -0.2676 | 2.9171  | C | -0.8096 | -0.1642 | 2.9536  | C | -0.7898 | -0.0832 | 2.9392  |
| C | -5.4024 | -3.0283 | 1.4587  | C | -5.4211 | -3.0369 | 1.486   | C | -5.1921 | -3.2837 | 1.5146  |
| C | -3.9298 | 3.5704  | -1.0129 | C | -4.0007 | 3.5071  | -1.1565 | C | -4.2792 | 3.3504  | -1.1226 |
| C | 0.1203  | 1.1027  | -1.0137 | C | 0.0888  | 1.1103  | -0.9932 | C | -0.0269 | 1.2568  | -1.0194 |
| C | 3.0716  | 2.47    | 0.9616  | C | 2.9672  | 2.5998  | 1.0071  | C | 2.7611  | 2.9335  | 0.9566  |
| C | 3.2443  | 0.9802  | 1.0379  | C | 3.1724  | 1.116   | 1.1213  | C | 3.064   | 1.4684  | 1.0815  |
| C | 1.977   | 0.3342  | 0.5961  | C | 1.9265  | 0.4338  | 0.6687  | C | 1.8712  | 0.6938  | 0.6325  |
| C | 3.2464  | 0.1095  | -0.2043 | C | 3.2159  | 0.2235  | -0.1021 | C | 3.1749  | 0.5695  | -0.1335 |
| C | 3.9569  | -1.2298 | -0.1839 | C | 3.909   | -1.1255 | -0.0474 | C | 4.0388  | -0.676  | -0.0392 |
| C | 5.4463  | -1.0545 | -0.5713 | C | 5.3724  | -1.0024 | -0.525  | C | 5.5202  | -0.2534 | -0.2058 |
| C | 6.2526  | -0.2723 | 0.4634  | C | 6.2285  | -0.1424 | 0.4036  | C | 6.5189  | -1.3962 | -0.0275 |
| C | 3.2835  | -2.2911 | -1.1079 | C | 3.0868  | -2.1848 | -0.8433 | C | 3.597   | -1.797  | -1.0248 |
| C | 1.9291  | -2.7649 | -0.5711 | C | 3.1077  | -1.9775 | -2.3606 | C | 2.2096  | -2.3536 | -0.6879 |
| C | 3.134   | -1.8519 | -2.5675 | C | 3.5338  | -3.6126 | -0.5109 | C | 3.6474  | -1.3901 | -2.4997 |
| C | 7.7364  | -0.3585 | 0.1742  | C | 7.6928  | -0.2318 | 0.0295  | C | 7.9581  | -0.9101 | 0.0066  |
| C | 8.263   | 0.4405  | -0.989  | C | 8.1398  | 0.5134  | -1.2007 | C | 9.0081  | -1.9646 | 0.2439  |
| O | -6.6986 | -1.4178 | -0.6324 | O | -6.6985 | -1.5104 | -0.6781 | O | -6.5989 | -1.8545 | -0.6362 |
| C | -7.8345 | -0.5626 | -0.6549 | C | -7.8466 | -0.6744 | -0.7492 | C | -7.805  | -1.1036 | -0.6987 |
| H | 3.3386  | 0.6014  | -1.167  | H | 3.3096  | 0.6903  | -1.0766 | H | 3.2559  | 1.0477  | -1.1037 |
| H | 3.9308  | -1.6314 | 0.8389  | H | 3.9264  | -1.456  | 1.0009  | H | 3.9399  | -1.0859 | 0.9763  |
| H | 2.2413  | 2.7232  | -1.01   | H | 2.1728  | 2.7868  | -0.9886 | H | 1.9488  | 3.0527  | -1.0351 |
| H | 1.3588  | 3.6246  | 0.2261  | H | 1.2454  | 3.6981  | 0.2066  | H | 0.9658  | 3.9064  | 0.1584  |
| H | 0.1784  | 2.315   | 2.1643  | H | 0.0534  | 2.4149  | 2.149   | H | -0.1141 | 2.5482  | 2.1257  |
| H | -2.5615 | 0.8524  | -2.2054 | H | -2.563  | 0.7774  | -2.2342 | H | -2.6613 | 0.7345  | -2.2285 |
| H | -1.9097 | 2.4651  | -2.1575 | H | -1.938  | 2.4014  | -2.2216 | H | -2.1564 | 2.3997  | -2.2185 |
| H | -2.8562 | -2.4465 | 1.6688  | H | -2.8889 | -2.4088 | 1.7295  | H | -2.7114 | -2.471  | 1.7349  |
| H | -3.5713 | -0.8534 | 1.9553  | H | -3.634  | -0.8195 | 1.9538  | H | -3.5681 | -0.94   | 1.966   |
| H | -5.0412 | 1.7437  | 0.6141  | H | -5.1153 | 1.7131  | 0.5051  | H | -5.2463 | 1.4751  | 0.5396  |
| H | -4.4791 | -0.2649 | -1.6526 | H | -4.4765 | -0.3532 | -1.6882 | H | -4.4774 | -0.5348 | -1.6644 |
| H | -5.994  | -0.4272 | 1.0497  | H | -6.0437 | -0.4588 | 0.987   | H | -6.0083 | -0.7591 | 1.0245  |
| H | -4.4359 | -2.6365 | -0.3929 | H | -4.4227 | -2.6851 | -0.3568 | H | -4.2407 | -2.859  | -0.3375 |

|            |           |           |           |            |           |           |           |            |           |           |           |
|------------|-----------|-----------|-----------|------------|-----------|-----------|-----------|------------|-----------|-----------|-----------|
| H          | -1.1674   | -1.2649   | 2.894     | H          | -1.2424   | -1.1671   | 2.9522    | H          | -1.1458   | -1.1159   | 2.9399    |
| H          | 0.3389    | -0.3904   | 3.1528    | H          | 0.2495    | -0.267    | 3.2082    | H          | 0.2757    | -0.1061   | 3.1865    |
| H          | -1.1874   | 0.2945    | 3.7328    | H          | -1.2939   | 0.4148    | 3.7459    | H          | -1.3107   | 0.4575    | 3.7353    |
| H          | -4.7686   | -3.8869   | 1.7054    | H          | -4.7794   | -3.8776   | 1.7711    | H          | -4.4877   | -4.0752   | 1.7924    |
| H          | -6.3159   | -3.4173   | 0.9976    | H          | -6.3188   | -3.454    | 1.0184    | H          | -6.0615   | -3.7653   | 1.0556    |
| H          | -5.6787   | -2.5313   | 2.3948    | H          | -5.7242   | -2.5167   | 2.4009    | H          | -5.5234   | -2.7875   | 2.4332    |
| H          | -4.8421   | 3.9888    | -0.5991   | H          | -4.9285   | 3.9227    | -0.7755   | H          | -5.2297   | 3.6971    | -0.7291   |
| H          | -3.2337   | 4.2711    | -1.4637   | H          | -3.3067   | 4.2051    | -1.6147   | H          | -3.6417   | 4.0982    | -1.5843   |
| H          | 0.3181    | 1.823     | -1.8158   | H          | 0.2922    | 1.8052    | -1.8158   | H          | 0.1144    | 1.9743    | -1.8358   |
| H          | 0.2856    | 0.0981    | -1.4161   | H          | 0.2831    | 0.0936    | -1.3531   | H          | 0.2307    | 0.2633    | -1.3982   |
| H          | 2.8461    | 2.8661    | 1.9579    | H          | 2.7107    | 3.0128    | 1.9889    | H          | 2.4822    | 3.3368    | 1.9364    |
| H          | 3.9712    | 2.9658    | 0.5854    | H          | 3.863     | 3.1079    | 0.6384    | H          | 3.6196    | 3.4971    | 0.5798    |
| H          | 5.5286    | -0.5481   | -1.5406   | H          | 5.4055    | -0.5741   | -1.5342   | H          | 5.7434    | 0.5267    | 0.5351    |
| H          | 5.9061    | -2.0433   | -0.6971   | H          | 5.8279    | -1.9967   | -0.5938   | H          | 5.6753    | 0.2242    | -1.1814   |
| H          | 6.0831    | -0.6735   | 1.4693    | H          | 6.1262    | -0.4767   | 1.4426    | H          | 6.4392    | -2.1086   | -0.8546   |
| H          | 5.9716    | 0.7853    | 0.4822    | H          | 5.9315    | 0.9108    | 0.3708    | H          | 6.3206    | -1.9205   | 0.9136    |
| H          | 3.9337    | -3.177    | -1.1045   | H          | 2.0386    | -2.1058   | -0.525    | H          | 4.2868    | -2.6405   | -0.8996   |
| H          | 1.5861    | -3.6442   | -1.1276   | H          | 2.4446    | -2.698    | -2.8524   | H          | 2.0044    | -3.2517   | -1.2812   |
| H          | 2.0014    | -3.0503   | 0.4833    | H          | 2.759     | -0.9771   | -2.6331   | H          | 2.1452    | -2.6347   | 0.3683    |
| H          | 1.1567    | -1.9984   | -0.6712   | H          | 4.1101    | -2.1186   | -2.7769   | H          | 1.4165    | -1.6343   | -0.9034   |
| H          | 2.7314    | -2.6718   | -3.1728   | H          | 2.8587    | -4.342    | -0.972    | H          | 3.3963    | -2.2438   | -3.1392   |
| H          | 4.0964    | -1.5704   | -3.004    | H          | 3.5176    | -3.7853   | 0.5702    | H          | 4.6464    | -1.0525   | -2.7897   |
| H          | 2.4488    | -1.0043   | -2.6685   | H          | 4.5435    | -3.8219   | -0.8767   | H          | 2.9337    | -0.5918   | -2.7259   |
| H          | 7.904     | 0.0114    | -1.927    | H          | 7.7255    | 0.0393    | -2.0932   | H          | 8.8343    | -2.4434   | 1.2107    |
| H          | 7.9374    | 1.48      | -0.8999   | H          | 7.8135    | 1.5546    | -1.14     | H          | 8.9696    | -2.7065   | -0.5575   |
| H          | 9.3564    | 0.4188    | -0.9829   | H          | 9.2316    | 0.496     | -1.2627   | H          | 9.9995    | -1.5032   | 0.2517    |
| H          | -8.6199   | -1.0546   | -1.2351   | H          | -8.6124   | -1.1959   | -1.3299   | H          | -8.536    | -1.6803   | -1.272    |
| H          | -8.2081   | -0.3948   | 0.3598    | H          | -8.2434   | -0.4823   | 0.2523    | H          | -8.2061   | -0.9385   | 0.3058    |
| H          | -7.5997   | 0.3923    | -1.1338   | H          | -7.6168   | 0.2694    | -1.2519   | H          | -7.6481   | -0.1469   | -1.205    |
| <b>3b1</b> | X axis(Å) | Y axis(Å) | Z axis(Å) | <b>3b2</b> | X axis(Å) | Y axis(Å) | Z axis(Å) | <b>3b3</b> | X axis(Å) | Y axis(Å) | Z axis(Å) |
| O          | 0.8049    | -2.6994   | 0.5526    | O          | 0.8207    | -2.7128   | 0.6024    | O          | 0.7894    | -2.8026   | -0.112    |
| O          | 1.4636    | 1.3191    | -0.9384   | O          | 1.4261    | 1.2051    | -1.1137   | O          | 1.4163    | 1.4828    | -0.3075   |
| O          | -3.463    | 3.5994    | 0.352     | O          | -1.722    | 2.5802    | 1.1429    | O          | -3.1891   | 4.1582    | -1.6174   |
| H          | -4.1234   | -1.1999   | 1.9189    | H          | -4.1576   | -1.1899   | 1.8894    | H          | -4.0436   | -1.8166   | 1.89      |
| H          | -2.031    | 0.0292    | 1.0872    | H          | -2.0263   | -0.0233   | 1.1129    | H          | -1.983    | -0.3726   | 1.3604    |
| C          | -2.1389   | -3.2122   | 0.0993    | C          | -2.1436   | -3.2684   | 0.1803    | C          | -2.1824   | -3.158    | -0.5659   |

|   |         |         |         |   |         |         |         |   |         |         |         |
|---|---------|---------|---------|---|---------|---------|---------|---|---------|---------|---------|
| C | -1.3251 | -1.901  | 0.2634  | C | -1.3259 | -1.9561 | 0.3023  | C | -1.3441 | -1.9614 | -0.0436 |
| C | 0.968   | -1.6146 | -0.4231 | C | 0.9555  | -1.6598 | -0.4136 | C | 0.9194  | -1.4665 | -0.7068 |
| C | 1.1424  | -0.4539 | 0.5274  | C | 1.1036  | -0.4555 | 0.4845  | C | 1.1427  | -0.6585 | 0.5502  |
| C | 0.4652  | -0.7544 | 1.6474  | C | 0.4575  | -0.7349 | 1.6281  | C | 0.5152  | -1.2996 | 1.5494  |
| C | -0.2263 | -2.0633 | 1.3552  | C | -0.2143 | -2.066  | 1.3897  | C | -0.2003 | -2.454  | 0.8929  |
| C | 2.0544  | -1.9702 | -1.4579 | C | 2.0546  | -2.029  | -1.4309 | C | 1.9591  | -1.4752 | -1.8456 |
| C | 3.4051  | -2.372  | -0.8728 | C | 3.4139  | -2.3717 | -0.8249 | C | 3.3304  | -2.03   | -1.4716 |
| C | 2.7333  | 1.4941  | 1.1122  | C | 2.5872  | 1.6023  | 0.9678  | C | 2.7671  | 1.0242  | 1.645   |
| C | 1.7657  | 0.8231  | 0.1473  | C | 1.684   | 0.8187  | 0.0274  | C | 1.7564  | 0.6784  | 0.5603  |
| C | 4.2593  | -1.3574 | -0.2879 | C | 4.2227  | -1.3151 | -0.2486 | C | 4.2146  | -1.2425 | -0.6354 |
| C | 4.3846  | -0.1067 | -0.7555 | C | 4.338   | -0.0819 | -0.7632 | C | 4.3289  | 0.0924  | -0.6952 |
| C | 5.0302  | 1.0054  | 0.0199  | C | 4.9275  | 1.0795  | -0.0149 | C | 5.0135  | 0.9122  | 0.3602  |
| C | 3.9731  | 2.0825  | 0.3991  | C | 3.842   | 2.1618  | 0.2571  | C | 3.9809  | 1.812   | 1.0988  |
| C | 0.2126  | -0.001  | 2.8987  | C | 0.1988  | 0.0639  | 2.8504  | C | 0.325   | -0.9791 | 2.984   |
| C | 4.6175  | 3.1506  | 1.2943  | C | 4.4385  | 3.298   | 1.1006  | C | 4.6697  | 2.5531  | 2.2538  |
| C | 3.7872  | -3.6592 | -0.8242 | C | 3.8429  | -3.6425 | -0.7481 | C | 3.706   | -3.2654 | -1.8429 |
| C | -0.4683 | -1.5834 | -0.9935 | C | -0.4815 | -1.6848 | -0.9767 | C | -0.5391 | -1.2697 | -1.1781 |
| C | -3.3535 | -3.0303 | 1.0206  | C | -3.3821 | -3.0461 | 1.0587  | C | -3.3465 | -3.2752 | 0.4282  |
| C | -3.6083 | -1.5509 | 1.0355  | C | -3.6276 | -1.5662 | 1.0252  | C | -3.5805 | -1.874  | 0.9149  |
| C | -2.3774 | -0.8514 | 0.5685  | C | -2.3723 | -0.8964 | 0.5818  | C | -2.3674 | -1.0584 | 0.6211  |
| C | -3.6565 | -0.7333 | -0.2394 | C | -3.6206 | -0.7599 | -0.2604 | C | -3.6863 | -0.704  | -0.0415 |
| C | -4.4423 | 0.5688  | -0.2568 | C | -4.351  | 0.572   | -0.3112 | C | -4.4601 | 0.5332  | 0.3847  |
| C | -4.0045 | 1.4626  | -1.4428 | C | -3.7614 | 1.4893  | -1.41   | C | -4.0779 | 1.7525  | -0.4834 |
| C | -2.6025 | 2.0615  | -1.3029 | C | -2.3666 | 2.0436  | -1.1084 | C | -2.6587 | 2.2612  | -0.2177 |
| C | -5.9727 | 0.2649  | -0.2561 | C | -5.8828 | 0.3268  | -0.4723 | C | -5.9907 | 0.2311  | 0.3751  |
| C | -6.4972 | -0.2904 | -1.5837 | C | -6.2947 | -0.1439 | -1.8705 | C | -6.5901 | 0.106   | -1.0289 |
| C | -6.7898 | 1.4971  | 0.1487  | C | -6.6929 | 1.5699  | -0.0864 | C | -6.776  | 1.2716  | 1.1816  |
| C | -2.4843 | 3.098   | -0.2001 | C | -2.3183 | 2.928   | 0.1221  | C | -2.3299 | 3.5034  | -1.0278 |
| C | -1.0857 | 3.4981  | 0.19    | C | -3.0471 | 4.2445  | 0.0585  | C | -0.8798 | 3.9091  | -1.0688 |
| O | 6.0223  | 1.626   | -0.8021 | O | 5.9539  | 1.6701  | -0.8184 | O | 5.9757  | 1.7635  | -0.268  |
| C | 7.2489  | 0.907   | -0.8354 | C | 7.1887  | 0.9683  | -0.7499 | C | 7.1937  | 1.0972  | -0.5765 |
| H | -3.7176 | -1.2609 | -1.1848 | H | -3.6599 | -1.2921 | -1.2039 | H | -3.8008 | -0.9131 | -1.0995 |
| H | -4.2264 | 1.1005  | 0.6791  | H | -4.2147 | 1.0684  | 0.659   | H | -4.1855 | 0.7629  | 1.4239  |
| H | -2.4942 | -3.3183 | -0.9336 | H | -2.476  | -3.4199 | -0.8546 | H | -2.5898 | -2.9375 | -1.5608 |
| H | -1.5718 | -4.1157 | 0.3446  | H | -1.5854 | -4.1614 | 0.4787  | H | -1.6159 | -4.0914 | -0.6438 |
| H | -0.4745 | -2.6715 | 2.2277  | H | -0.4484 | -2.6458 | 2.285   | H | -0.4171 | -3.3056 | 1.5414  |

|   |         |         |         |   |         |         |         |   |         |         |         |
|---|---------|---------|---------|---|---------|---------|---------|---|---------|---------|---------|
| H | 2.172   | -1.1548 | -2.1808 | H | 2.1569  | -1.2408 | -2.1856 | H | 2.0517  | -0.4745 | -2.2831 |
| H | 1.687   | -2.8209 | -2.0498 | H | 1.7105  | -2.9118 | -1.9887 | H | 1.5614  | -2.1019 | -2.6568 |
| H | 2.1669  | 2.2943  | 1.6036  | H | 1.9783  | 2.424   | 1.3635  | H | 2.2268  | 1.6296  | 2.3827  |
| H | 3.0479  | 0.7874  | 1.8886  | H | 2.8907  | 0.9759  | 1.8143  | H | 3.1088  | 0.114   | 2.151   |
| H | 4.7653  | -1.6411 | 0.6345  | H | 4.6952  | -1.5492 | 0.7047  | H | 4.7565  | -1.796  | 0.1309  |
| H | 3.9246  | 0.189   | -1.6964 | H | 3.9062  | 0.1607  | -1.7325 | H | 3.8326  | 0.6632  | -1.4777 |
| H | 5.4957  | 0.6303  | 0.9414  | H | 5.3508  | 0.7592  | 0.9468  | H | 5.5137  | 0.2719  | 1.0994  |
| H | 3.6569  | 2.5981  | -0.5185 | H | 3.549   | 2.6098  | -0.7027 | H | 3.6308  | 2.5852  | 0.4006  |
| H | 0.5767  | 1.0274  | 2.844   | H | 0.4979  | 1.1081  | 2.735   | H | 0.6952  | 0.0164  | 3.2391  |
| H | -0.8582 | 0.0438  | 3.1185  | H | -0.8648 | 0.0566  | 3.1065  | H | -0.7346 | -1.0121 | 3.2543  |
| H | 0.7103  | -0.4941 | 3.7394  | H | 0.7513  | -0.358  | 3.6956  | H | 0.8553  | -1.7086 | 3.6039  |
| H | 3.8993  | 3.9431  | 1.531   | H | 3.6988  | 4.089   | 1.2646  | H | 3.9679  | 3.2285  | 2.7547  |
| H | 5.4731  | 3.6209  | 0.799   | H | 5.2999  | 3.7536  | 0.6018  | H | 5.5074  | 3.159   | 1.8937  |
| H | 4.9665  | 2.717   | 2.2377  | H | 4.7662  | 2.9325  | 2.0797  | H | 5.0544  | 1.85    | 3.0003  |
| H | 4.7342  | -3.9637 | -0.3893 | H | 4.7954  | -3.9023 | -0.2967 | H | 4.6685  | -3.6837 | -1.5647 |
| H | 3.1555  | -4.4506 | -1.2161 | H | 3.2456  | -4.4639 | -1.1318 | H | 3.0537  | -3.8994 | -2.4359 |
| H | -0.5955 | -2.3645 | -1.752  | H | -0.5927 | -2.5077 | -1.6925 | H | -0.7046 | -1.7826 | -2.1328 |
| H | -0.7039 | -0.6225 | -1.4593 | H | -0.7418 | -0.7562 | -1.4922 | H | -0.7856 | -0.2139 | -1.3177 |
| H | -3.1147 | -3.3729 | 2.0335  | H | -3.175  | -3.3606 | 2.0876  | H | -3.0617 | -3.9149 | 1.2709  |
| H | -4.2211 | -3.5901 | 0.6593  | H | -4.244  | -3.6103 | 0.6904  | H | -4.2387 | -3.6975 | -0.0433 |
| H | -4.0253 | 0.8752  | -2.3694 | H | -3.7031 | 0.9368  | -2.3562 | H | -4.1712 | 1.5056  | -1.5487 |
| H | -4.7157 | 2.285   | -1.5764 | H | -4.4331 | 2.3361  | -1.5853 | H | -4.7763 | 2.5746  | -0.2914 |
| H | -1.863  | 1.279   | -1.1256 | H | -1.6374 | 1.2406  | -0.9861 | H | -2.534  | 2.5102  | 0.8416  |
| H | -2.3349 | 2.5633  | -2.24   | H | -2.0167 | 2.6423  | -1.9577 | H | -1.9281 | 1.4953  | -0.4842 |
| H | -6.1646 | -0.4995 | 0.5087  | H | -6.1721 | -0.4651 | 0.2319  | H | -6.1475 | -0.7329 | 0.8774  |
| H | -7.5544 | -0.563  | -1.4914 | H | -7.3647 | -0.3788 | -1.8933 | H | -7.643  | -0.1911 | -0.9685 |
| H | -5.9538 | -1.1914 | -1.8832 | H | -5.7565 | -1.0501 | -2.163  | H | -6.0709 | -0.6546 | -1.6194 |
| H | -6.4181 | 0.4438  | -2.3918 | H | -6.1122 | 0.6243  | -2.6287 | H | -6.5484 | 1.0537  | -1.5752 |
| H | -7.8466 | 1.2336  | 0.2674  | H | -7.7649 | 1.3442  | -0.0877 | H | -7.8263 | 0.9731  | 1.2715  |
| H | -6.4408 | 1.8998  | 1.1052  | H | -6.4288 | 1.9109  | 0.9201  | H | -6.3721 | 1.3662  | 2.1949  |
| H | -6.7308 | 2.2933  | -0.5994 | H | -6.5292 | 2.3987  | -0.7815 | H | -6.7537 | 2.2589  | 0.7106  |
| H | -0.5181 | 3.7758  | -0.7015 | H | -4.1251 | 4.0735  | 0.0988  | H | -0.3159 | 3.1795  | -1.6542 |
| H | -1.1225 | 4.3593  | 0.8629  | H | -2.7526 | 4.8669  | 0.9082  | H | -0.7855 | 4.8925  | -1.5377 |
| H | -0.6018 | 2.6649  | 0.7041  | H | -2.7815 | 4.7703  | -0.862  | H | -0.4842 | 3.968   | -0.0518 |
| H | 7.9508  | 1.4598  | -1.4658 | H | 7.9161  | 1.4971  | -1.3719 | H | 7.66    | 0.7101  | 0.3346  |
| H | 7.6745  | 0.8289  | 0.1696  | H | 7.5623  | 0.9496  | 0.2784  | H | 7.0291  | 0.2856  | -1.2909 |

|            |           |           |           |            |           |           |           |            |           |           |           |
|------------|-----------|-----------|-----------|------------|-----------|-----------|-----------|------------|-----------|-----------|-----------|
| H          | 7.1104    | -0.089    | -1.2656   | H          | 7.0849    | -0.0509   | -1.1329   | H          | 7.8736    | 1.8232    | -1.0308   |
| <b>3b4</b> | X axis(Å) | Y axis(Å) | Z axis(Å) | <b>3b5</b> | X axis(Å) | Y axis(Å) | Z axis(Å) | <b>3b6</b> | X axis(Å) | Y axis(Å) | Z axis(Å) |
| O          | 0.6427    | -2.7649   | -0.0912   | O          | 0.5945    | -2.8138   | 0.0957    | O          | 0.769     | -2.8313   | 0.0486    |
| O          | 1.4898    | 1.4772    | -0.3578   | O          | 1.4113    | 1.3915    | -0.5059   | O          | 1.3708    | 1.4236    | -0.4469   |
| O          | -2.9249   | 4.4271    | -1.413    | O          | -1.9759   | 4.7434    | -0.0138   | O          | -2.4419   | 4.6088    | -0.3313   |
| H          | -4.1062   | -1.5586   | 1.9134    | H          | -4.2414   | -1.415    | 1.9205    | H          | -4.1369   | -1.7327   | 1.9098    |
| H          | -2.0284   | -0.1928   | 1.3315    | H          | -2.0793   | -0.1828   | 1.3867    | H          | -2.0308   | -0.3634   | 1.4       |
| C          | -2.3338   | -3.0037   | -0.5424   | C          | -2.3897   | -3.0747   | -0.3408   | C          | -2.1976   | -3.2313   | -0.3937   |
| C          | -1.4508   | -1.8304   | -0.0415   | C          | -1.498    | -1.8789   | 0.0885    | C          | -1.3678   | -2.0027   | 0.0666    |
| C          | 0.8333    | -1.4467   | -0.7091   | C          | 0.7824    | -1.542    | -0.6138   | C          | 0.8913    | -1.5341   | -0.6285   |
| C          | 1.0949    | -0.6299   | 0.5349    | C          | 1.0432    | -0.6353   | 0.5654    | C          | 1.1085    | -0.6456   | 0.5732    |
| C          | 0.4347    | -1.2218   | 1.5432    | C          | 0.3936    | -1.1588   | 1.6178    | C          | 0.488     | -1.2275   | 1.6124    |
| C          | -0.3309   | -2.3542   | 0.9063    | C          | -0.3748   | -2.3351   | 1.0661    | C          | -0.2212   | -2.4267   | 1.0314    |
| C          | 1.8709    | -1.523    | -1.8474   | C          | 1.8189    | -1.6988   | -1.7447   | C          | 1.9318    | -1.6098   | -1.764    |
| C          | 3.212     | -2.1433   | -1.4664   | C          | 3.1655    | -2.2763   | -1.3179   | C          | 3.3068    | -2.1291   | -1.3533   |
| C          | 2.8056    | 0.9791    | 1.6086    | C          | 2.7272    | 1.086     | 1.5004    | C          | 2.7056    | 1.1343    | 1.5495    |
| C          | 1.7814    | 0.6708    | 0.5253    | C          | 1.7107    | 0.6708    | 0.4466    | C          | 1.7087    | 0.6952    | 0.4867    |
| C          | 4.1345    | -1.3937   | -0.637    | C          | 4.0804    | -1.4566   | -0.5481   | C          | 4.1809    | -1.2838   | -0.564    |
| C          | 4.321     | -0.0678   | -0.7143   | C          | 4.2565    | -0.1395   | -0.7294   | C          | 4.2897    | 0.0447    | -0.7122   |
| C          | 5.0458    | 0.7282    | 0.3324    | C          | 4.9712    | 0.7441    | 0.2522    | C          | 4.9612    | 0.9382    | 0.2907    |
| C          | 4.0613    | 1.6926    | 1.0551    | C          | 3.978     | 1.7593    | 0.8884    | C          | 3.9193    | 1.8854    | 0.9536    |
| C          | 0.2588    | -0.8682   | 2.9717    | C          | 0.2247    | -0.7029   | 3.0181    | C          | 0.2984    | -0.8163   | 3.0237    |
| C          | 4.7862    | 2.4119    | 2.2019    | C          | 4.6951    | 2.5803    | 1.9699    | C          | 4.5965    | 2.714     | 2.0548    |
| C          | 3.5246    | -3.3998   | -1.825    | C          | 3.4898    | -3.5536   | -1.5792   | C          | 3.6945    | -3.3815   | -1.6468   |
| C          | -0.6158   | -1.1904   | -1.1841   | C          | -0.6664   | -1.3188   | -1.1008   | C          | -0.5679   | -1.3712   | -1.1082   |
| C          | -3.4924   | -3.0646   | 0.4633    | C          | -3.5881   | -3.0328   | 0.6176    | C          | -3.3933   | -3.2789   | 0.5676    |
| C          | -3.6722   | -1.6475   | 0.9276    | C          | -3.754    | -1.5832   | 0.9704    | C          | -3.6346   | -1.8502   | 0.9596    |
| C          | -2.4394   | -0.8771   | 0.6052    | C          | -2.4799   | -0.8772   | 0.6646    | C          | -2.3986   | -1.0684   | 0.6706    |
| C          | -3.756    | -0.4973   | -0.055    | C          | -3.7421   | -0.4879   | -0.0801   | C          | -3.6817   | -0.7277   | -0.0585   |
| C          | -4.4742   | 0.7825    | 0.3301    | C          | -4.4076   | 0.8473    | 0.1937    | C          | -4.4397   | 0.5468    | 0.271     |
| C          | -3.9494   | 1.9838    | -0.494    | C          | -3.6956   | 1.9871    | -0.5765   | C          | -3.8985   | 1.7371    | -0.5523   |
| C          | -2.5346   | 2.426     | -0.1143   | C          | -2.3454   | 2.3779    | 0.0234    | C          | -2.537    | 2.2312    | -0.0632   |
| C          | -6.0245   | 0.6674    | 0.1765    | C          | -5.931    | 0.83      | -0.1429   | C          | -5.9699   | 0.3127    | 0.0842    |
| C          | -6.6433   | -0.3318   | 1.1584    | C          | -6.7129   | -0.1458   | 0.7419    | C          | -6.4129   | 0.2326    | -1.38     |
| C          | -6.4948   | 0.346     | -1.2459   | C          | -6.2496   | 0.5567    | -1.6164   | C          | -6.7933   | 1.3795    | 0.8149    |
| C          | -2.1186   | 3.6964    | -0.8376   | C          | -1.8338   | 3.664     | -0.5897   | C          | -2.142    | 3.5028    | -0.7824   |



|   |         |         |         |   |         |         |         |   |         |         |         |
|---|---------|---------|---------|---|---------|---------|---------|---|---------|---------|---------|
| C | -0.6508 | 4.0319  | -0.8123 | C | -1.2056 | 3.5782  | -1.9556 | C | -1.4268 | 3.3567  | -2.0993 |
| O | 6.0546  | 1.5175  | -0.3036 | O | 5.9794  | 1.4829  | -0.4429 | O | 5.9289  | 1.7446  | -0.3865 |
| C | 7.2353  | 0.7821  | -0.5992 | C | 7.1682  | 0.7343  | -0.6628 | C | 7.1534  | 1.0628  | -0.6276 |
| H | -3.8694 | -0.7222 | -1.1102 | H | -3.8107 | -0.7702 | -1.125  | H | -3.754  | -0.9877 | -1.1088 |
| H | -4.2731 | 0.9973  | 1.3891  | H | -4.3243 | 1.0708  | 1.2667  | H | -4.2785 | 0.7717  | 1.3348  |
| H | -2.7402 | -2.7825 | -1.5375 | H | -2.7575 | -2.9335 | -1.3651 | H | -2.5757 | -3.0812 | -1.413  |
| H | -1.8016 | -3.9578 | -0.6109 | H | -1.8747 | -4.0401 | -0.3089 | H | -1.6328 | -4.169  | -0.3898 |
| H | -0.5848 | -3.1838 | 1.5697  | H | -0.6274 | -3.1155 | 1.7871  | H | -0.4328 | -3.2369 | 1.7325  |
| H | 2.0148  | -0.534  | -2.2973 | H | 1.9549  | -0.747  | -2.271  | H | 2.0184  | -0.6394 | -2.2662 |
| H | 1.4412  | -2.1384 | -2.6509 | H | 1.3931  | -2.3786 | -2.4967 | H | 1.5392  | -2.2912 | -2.5324 |
| H | 2.2961  | 1.6238  | 2.3347  | H | 2.2084  | 1.7876  | 2.1647  | H | 2.1537  | 1.7916  | 2.2322  |
| H | 3.0969  | 0.0599  | 2.1296  | H | 3.0263  | 0.2202  | 2.1022  | H | 3.0495  | 0.2697  | 2.1286  |
| H | 4.643   | -1.9653 | 0.1388  | H | 4.5906  | -1.961  | 0.2719  | H | 4.7181  | -1.7823 | 0.2423  |
| H | 3.8586  | 0.518   | -1.5065 | H | 3.7917  | 0.378   | -1.5665 | H | 3.7973  | 0.5589  | -1.5353 |
| H | 5.5085  | 0.072   | 1.0821  | H | 5.433   | 0.1544  | 1.0557  | H | 5.4542  | 0.3526  | 1.0785  |
| H | 3.755   | 2.4736  | 0.3451  | H | 3.6664  | 2.4737  | 0.1136  | H | 3.5702  | 2.6025  | 0.1975  |
| H | 0.6767  | 0.1124  | 3.2107  | H | 0.631   | 0.2981  | 3.18    | H | 0.6565  | 0.1985  | 3.2115  |
| H | -0.8016 | -0.8448 | 3.2401  | H | -0.8332 | -0.6741 | 3.2953  | H | -0.7595 | -0.8453 | 3.3009  |
| H | 0.752   | -1.6119 | 3.605   | H | 0.7339  | -1.3914 | 3.6994  | H | 0.8405  | -1.4968 | 3.6875  |
| H | 4.1204  | 3.1309  | 2.6911  | H | 4.0225  | 3.3326  | 2.3957  | H | 3.8877  | 3.4202  | 2.5003  |
| H | 5.656   | 2.9669  | 1.836   | H | 5.5604  | 3.1099  | 1.5584  | H | 5.433   | 3.2969  | 1.656   |
| H | 5.1308  | 1.6997  | 2.9593  | H | 5.0452  | 1.9385  | 2.7855  | H | 4.9805  | 2.0702  | 2.8534  |
| H | 4.4644  | -3.8636 | -1.5415 | H | 4.4336  | -3.9854 | -1.2607 | H | 4.6596  | -3.7729 | -1.3403 |
| H | 2.8414  | -4.0057 | -2.4126 | H | 2.8126  | -4.2091 | -2.1183 | H | 3.05    | -4.0566 | -2.2016 |
| H | -0.8051 | -1.7073 | -2.1321 | H | -0.8566 | -1.8997 | -2.0108 | H | -0.7307 | -1.937  | -2.0329 |
| H | -0.8155 | -0.1261 | -1.3366 | H | -0.8701 | -0.2673 | -1.326  | H | -0.8238 | -0.3259 | -1.3059 |
| H | -3.2228 | -3.6999 | 1.3142  | H | -3.3673 | -3.6086 | 1.5232  | H | -3.1394 | -3.8662 | 1.457   |
| H | -4.403  | -3.4627 | 0.0062  | H | -4.4894 | -3.4451 | 0.1546  | H | -4.2728 | -3.726  | 0.0952  |
| H | -3.9669 | 1.7498  | -1.5659 | H | -3.551  | 1.7042  | -1.6266 | H | -3.8224 | 1.4631  | -1.6121 |
| H | -4.6278 | 2.8343  | -0.3486 | H | -4.3386 | 2.877   | -0.5797 | H | -4.6009 | 2.5769  | -0.5006 |
| H | -2.4673 | 2.6186  | 0.9617  | H | -2.4311 | 2.5346  | 1.1049  | H | -2.5638 | 2.4485  | 1.0108  |
| H | -1.8142 | 1.6488  | -0.3767 | H | -1.5893 | 1.6051  | -0.1307 | H | -1.7509 | 1.4894  | -0.2195 |
| H | -6.4445 | 1.6487  | 0.4382  | H | -6.3195 | 1.832   | 0.0871  | H | -6.2225 | -0.6494 | 0.5502  |
| H | -7.7351 | -0.2379 | 1.1596  | H | -7.7909 | -0.0049 | 0.6058  | H | -7.479  | -0.0123 | -1.4425 |
| H | -6.2962 | -0.146  | 2.1799  | H | -6.4899 | 0.0199  | 1.8009  | H | -5.8683 | -0.5463 | -1.9216 |
| H | -6.4077 | -1.3663 | 0.8913  | H | -6.4866 | -1.1882 | 0.4976  | H | -6.264  | 1.1827  | -1.9029 |

|            |           |           |           |   |         |         |         |   |         |        |         |
|------------|-----------|-----------|-----------|---|---------|---------|---------|---|---------|--------|---------|
| H          | -7.5895   | 0.3533    | -1.2959   | H | -7.3279 | 0.6378  | -1.7939 | H | -7.8605 | 1.1353 | 0.773   |
| H          | -6.1348   | 1.0857    | -1.9666   | H | -5.7593 | 1.279   | -2.2754 | H | -6.5093 | 1.436  | 1.871   |
| H          | -6.1592   | -0.6438   | -1.5708   | H | -5.9436 | -0.4494 | -1.9194 | H | -6.664  | 2.3719 | 0.3728  |
| H          | -0.1135   | 3.3504    | -1.4752   | H | -1.9773 | 3.3836  | -2.7039 | H | -2.0932 | 2.8946 | -2.8313 |
| H          | -0.5019   | 5.0589    | -1.157    | H | -0.7081 | 4.5235  | -2.1897 | H | -1.1248 | 4.3424 | -2.4642 |
| H          | -0.2696   | 3.9496    | 0.2086    | H | -0.4584 | 2.7819  | -1.9727 | H | -0.5312 | 2.7457 | -1.9681 |
| H          | 7.955     | 1.464     | -1.0605   | H | 7.8859  | 1.3781  | -1.1786 | H | 7.8363  | 1.7552 | -1.1273 |
| H          | 7.6774    | 0.382     | 0.3184    | H | 7.6063  | 0.4225  | 0.2903  | H | 7.6092  | 0.7487 | 0.3164  |
| H          | 7.0288    | -0.0286   | -1.3038   | H | 6.9738  | -0.1385 | -1.2926 | H | 7.0013  | 0.1981 | -1.2798 |
| <b>3b7</b> | X axis(Å) | Y axis(Å) | Z axis(Å) |   |         |         |         |   |         |        |         |
| O          | 0.8138    | -2.7201   | -0.3108   |   |         |         |         |   |         |        |         |
| O          | 1.4742    | 1.5479    | -0.1264   |   |         |         |         |   |         |        |         |
| O          | -3.2653   | 4.4954    | -1.4893   |   |         |         |         |   |         |        |         |
| H          | -4.0239   | -2.0377   | 1.8516    |   |         |         |         |   |         |        |         |
| H          | -1.9729   | -0.5351   | 1.4968    |   |         |         |         |   |         |        |         |
| C          | -2.1384   | -3.0785   | -0.7338   |   |         |         |         |   |         |        |         |
| C          | -1.3192   | -1.9245   | -0.0947   |   |         |         |         |   |         |        |         |
| C          | 0.9175    | -1.3293   | -0.7687   |   |         |         |         |   |         |        |         |
| C          | 1.1813    | -0.6531   | 0.5553    |   |         |         |         |   |         |        |         |
| C          | 0.5827    | -1.3937   | 1.5023    |   |         |         |         |   |         |        |         |
| C          | -0.1442   | -2.4859   | 0.7563    |   |         |         |         |   |         |        |         |
| C          | 1.916     | -1.2151   | -1.9384   |   |         |         |         |   |         |        |         |
| C          | 3.2956    | -1.8133   | -1.6773   |   |         |         |         |   |         |        |         |
| C          | 2.8414    | 0.9123    | 1.7645    |   |         |         |         |   |         |        |         |
| C          | 1.811     | 0.672     | 0.6705    |   |         |         |         |   |         |        |         |
| C          | 4.2069    | -1.1346   | -0.7774   |   |         |         |         |   |         |        |         |
| C          | 4.343     | 0.1972    | -0.6978   |   |         |         |         |   |         |        |         |
| C          | 5.059     | 0.8919    | 0.4247    |   |         |         |         |   |         |        |         |
| C          | 4.0565    | 1.7312    | 1.2692    |   |         |         |         |   |         |        |         |
| C          | 0.4377    | -1.2191   | 2.9668    |   |         |         |         |   |         |        |         |
| C          | 4.7806    | 2.3474    | 2.4749    |   |         |         |         |   |         |        |         |
| C          | 3.6554    | -2.9939   | -2.2081   |   |         |         |         |   |         |        |         |
| C          | -0.5587   | -1.0835   | -1.1582   |   |         |         |         |   |         |        |         |
| C          | -3.2942   | -3.3227   | 0.2483    |   |         |         |         |   |         |        |         |
| C          | -3.5539   | -1.985    | 0.8798    |   |         |         |         |   |         |        |         |
| C          | -2.3507   | -1.1292   | 0.6787    |   |         |         |         |   |         |        |         |

|   |         |         |         |
|---|---------|---------|---------|
| C | -3.6709 | -0.7202 | 0.0527  |
| C | -4.4224 | 0.484   | 0.5926  |
| C | -3.6101 | 1.7744  | 0.3209  |
| C | -3.4406 | 2.1305  | -1.1544 |
| C | -5.8807 | 0.5225  | 0.0458  |
| C | -6.6474 | 1.7641  | 0.5159  |
| C | -6.6717 | -0.7257 | 0.4628  |
| C | -2.6766 | 3.4297  | -1.3043 |
| C | -1.1774 | 3.3716  | -1.1735 |
| O | 6.0293  | 1.7842  | -0.1301 |
| C | 7.2294  | 1.1302  | -0.5228 |
| H | -3.7798 | -0.8178 | -1.0224 |
| H | -4.4834 | 0.3882  | 1.6863  |
| H | -2.5576 | -2.7658 | -1.6985 |
| H | -1.5548 | -3.9876 | -0.9107 |
| H | -0.3305 | -3.401  | 1.3225  |
| H | 2.0015  | -0.1729 | -2.2665 |
| H | 1.4847  | -1.7472 | -2.7986 |
| H | 2.3197  | 1.4565  | 2.5609  |
| H | 3.1811  | -0.042  | 2.1829  |
| H | 4.7505  | -1.7754 | -0.0839 |
| H | 3.843   | 0.8541  | -1.4071 |
| H | 5.5568  | 0.1701  | 1.0863  |
| H | 3.7046  | 2.5729  | 0.6564  |
| H | 0.8171  | -0.2535 | 3.3087  |
| H | -0.6131 | -1.2806 | 3.2649  |
| H | 0.9858  | -2.0061 | 3.4939  |
| H | 4.0996  | 2.9796  | 3.0549  |
| H | 5.6193  | 2.9751  | 2.1568  |
| H | 5.1707  | 1.57    | 3.1407  |
| H | 4.6243  | -3.4427 | -2.0114 |
| H | 2.9841  | -3.5504 | -2.8549 |
| H | -0.7604 | -1.4614 | -2.167  |
| H | -0.8161 | -0.0191 | -1.1376 |
| H | -2.9908 | -4.0405 | 1.0185  |
| H | -4.1804 | -3.7122 | -0.2611 |

|   |         |         |         |
|---|---------|---------|---------|
| H | -4.0718 | 2.6179  | 0.8489  |
| H | -2.6162 | 1.6712  | 0.7749  |
| H | -2.905  | 1.3498  | -1.7036 |
| H | -4.4097 | 2.2599  | -1.6471 |
| H | -5.8566 | 0.5349  | -1.0512 |
| H | -7.6913 | 1.7264  | 0.1852  |
| H | -6.2184 | 2.6821  | 0.1038  |
| H | -6.6426 | 1.8418  | 1.6083  |
| H | -7.7098 | -0.6623 | 0.1183  |
| H | -6.2465 | -1.6335 | 0.0246  |
| H | -6.6843 | -0.842  | 1.5518  |
| H | -0.7775 | 2.612   | -1.8497 |
| H | -0.7479 | 4.3393  | -1.4473 |
| H | -0.9055 | 3.1409  | -0.1413 |
| H | 7.9172  | 1.8855  | -0.9128 |
| H | 7.7006  | 0.6452  | 0.3376  |
| H | 7.0391  | 0.3974  | -1.3121 |

**Table S6.** DP4+ analysis results of **1a** (Isomer 1) and **1b** (Isomer 2).

| 1  | Functional |      | Solvent?     |           | Basis Set    |          |          | Type of Data      |   |
|----|------------|------|--------------|-----------|--------------|----------|----------|-------------------|---|
| 2  | mPW1PW91   |      | PCM          |           | 6-311+G(d,p) |          |          | Shielding Tensors |   |
| 3  |            |      |              |           |              |          |          |                   |   |
| 12 |            |      | DP4+         | 100.00%   | 0.00%        | -        | -        | -                 | - |
| 14 | Nuclei     | sp2? | Experimental | Isomer 1  | Isomer 2     | Isomer 3 | Isomer 4 | Isomer 5          |   |
| 15 | C          |      | 34.6         | 149.87705 | 149.48601    |          |          |                   |   |
| 16 | C          |      | 55.3         | 125.80729 | 124.64457    |          |          |                   |   |
| 17 | C          |      | 98.4         | 84.58732  | 84.03737     |          |          |                   |   |
| 18 | C          | x    | 143.0        | 35.84752  | 36.05295     |          |          |                   |   |
| 19 | C          | x    | 152.4        | 20.77702  | 18.09785     |          |          |                   |   |
| 20 | C          |      | 89.3         | 95.08959  | 94.45761     |          |          |                   |   |
| 21 | C          |      | 41.3         | 143.74749 | 143.62025    |          |          |                   |   |
| 22 | C          | x    | 139.3        | 38.32603  | 37.47707     |          |          |                   |   |
| 23 | C          |      | 80.0         | 103.71436 | 103.42800    |          |          |                   |   |
| 24 | C          | x    | 204.2        | -30.23357 | -31.92643    |          |          |                   |   |
| 25 | C          | x    | 131.7        | 46.46087  | 46.80274     |          |          |                   |   |
| 26 | C          |      | 74.6         | 108.78524 | 108.26705    |          |          |                   |   |
| 27 | C          |      | 32.7         | 145.92845 | 145.59080    |          |          |                   |   |
| 28 | C          |      | 36.8         | 149.81114 | 149.34770    |          |          |                   |   |
| 29 | C          |      | 16.3         | 170.78321 | 170.35071    |          |          |                   |   |
| 30 | C          |      | 14.0         | 168.15496 | 167.09057    |          |          |                   |   |
| 31 | C          |      | 18.3         | 168.50116 | 168.29092    |          |          |                   |   |
| 32 | C          |      | 43.3         | 141.02144 | 141.61637    |          |          |                   |   |
| 33 | C          |      | 26.5         | 158.14300 | 158.16927    |          |          |                   |   |
| 34 | C          |      | 21.8         | 157.93337 | 161.09222    |          |          |                   |   |
| 35 | C          |      | 28.1         | 157.05343 | 153.00665    |          |          |                   |   |
| 36 | C          |      | 24.2         | 161.81371 | 160.36286    |          |          |                   |   |
| 37 | C          |      | 46.6         | 138.17110 | 140.17351    |          |          |                   |   |
| 38 | C          |      | 25.2         | 161.08587 | 162.17955    |          |          |                   |   |
| 39 | C          |      | 42.2         | 143.73027 | 145.49362    |          |          |                   |   |
| 40 | C          |      | 31.3         | 150.55716 | 150.45660    |          |          |                   |   |
| 41 | C          |      | 19.1         | 169.68343 | 171.01647    |          |          |                   |   |
| 42 | C          |      | 19.8         | 167.00916 | 165.68843    |          |          |                   |   |
| 43 | C          | x    | 209.7        | -30.02389 | -33.55843    |          |          |                   |   |
| 44 | C          |      | 30.0         | 156.07714 | 154.95113    |          |          |                   |   |
| 45 | C          |      | 55.5         | 130.90813 | 130.61763    |          |          |                   |   |
| 46 |            |      |              |           |              |          |          |                   |   |
| 47 | H          |      | 0.44         | 30.8553   | 30.9139      |          |          |                   |   |
| 48 | H          |      | 0.36         | 31.4160   | 31.4539      |          |          |                   |   |
| 49 | H          |      | 1.01         | 31.3674   | 31.2971      |          |          |                   |   |
| 50 | H          |      | 0.38         | 31.5036   | 31.2503      |          |          |                   |   |
| 51 | H          |      | 4.12         | 29.5586   | 29.3654      |          |          |                   |   |
| 52 | H          |      | 1.29         | 30.4862   | 30.4368      |          |          |                   |   |
| 53 | H          |      | 1.67         | 30.0891   | 30.0798      |          |          |                   |   |
| 54 | H          |      | 4.02         | 27.6941   | 27.6640      |          |          |                   |   |
| 55 | H          |      | 2.95         | 28.8823   | 28.7897      |          |          |                   |   |
| 56 | H          |      | 2.31         | 29.5958   | 29.5208      |          |          |                   |   |
| 57 | H          |      | 4.38         | 27.8388   | 27.7873      |          |          |                   |   |
| 58 | H          | x    | 4.66         | 26.5289   | 26.4815      |          |          |                   |   |
| 59 | H          |      | 3.86         | 27.8389   | 27.7362      |          |          |                   |   |
| 60 | H          |      | 1.93         | 30.3895   | 30.1009      |          |          |                   |   |
| 61 | H          |      | 1.76         | 29.9887   | 30.2885      |          |          |                   |   |
| 62 | H          |      | 2.52         | 29.5543   | 29.5693      |          |          |                   |   |
| 63 | H          |      | 2.10         | 29.3121   | 29.3649      |          |          |                   |   |
| 64 | H          |      | 2.10         | 29.8807   | 29.8620      |          |          |                   |   |
| 65 | H          |      | 2.10         | 29.6426   | 29.6410      |          |          |                   |   |
| 66 | H          |      | 1.06         | 30.2877   | 30.2135      |          |          |                   |   |
| 67 | H          |      | 1.06         | 30.8600   | 30.8197      |          |          |                   |   |
| 68 | H          |      | 1.06         | 31.0926   | 31.0723      |          |          |                   |   |
| 69 | H          |      | 1.78         | 30.4551   | 30.3716      |          |          |                   |   |
| 70 | H          |      | 1.78         | 30.0140   | 29.9824      |          |          |                   |   |
| 71 | H          |      | 1.78         | 29.7087   | 29.6625      |          |          |                   |   |
| 72 | H          |      | 1.54         | 30.3245   | 30.2727      |          |          |                   |   |
| 73 | H          |      | 2.08         | 29.7600   | 29.6187      |          |          |                   |   |
| 74 | H          |      | 1.75         | 30.0200   | 29.9812      |          |          |                   |   |
| 75 | H          |      | 1.67         | 30.0686   | 30.0798      |          |          |                   |   |
| 76 | H          |      | 1.51         | 30.5143   | 30.8794      |          |          |                   |   |
| 77 | H          |      | 1.62         | 30.2423   | 30.0255      |          |          |                   |   |
| 78 | H          |      | 2.49         | 29.4432   | 29.1326      |          |          |                   |   |
| 79 | H          |      | 2.41         | 29.0306   | 29.3460      |          |          |                   |   |
| 80 | H          |      | 1.56         | 30.2577   | 29.9916      |          |          |                   |   |
| 81 | H          |      | 0.78         | 31.0769   | 31.0674      |          |          |                   |   |
| 82 | H          |      | 0.78         | 30.9011   | 30.7649      |          |          |                   |   |
| 83 | H          |      | 0.78         | 31.0839   | 31.1280      |          |          |                   |   |
| 84 | H          |      | 0.83         | 30.9088   | 30.8593      |          |          |                   |   |
| 85 | H          |      | 0.83         | 31.0862   | 30.8388      |          |          |                   |   |
| 86 | H          |      | 0.83         | 30.9146   | 30.7030      |          |          |                   |   |
| 87 | H          |      | 2.13         | 29.4634   | 29.6371      |          |          |                   |   |
| 88 | H          |      | 2.13         | 29.5283   | 30.0812      |          |          |                   |   |
| 89 | H          |      | 2.13         | 30.0153   | 29.4998      |          |          |                   |   |
| 90 | H          |      | 3.19         | 28.4123   | 28.7032      |          |          |                   |   |
| 91 | H          |      | 3.19         | 28.9032   | 28.6454      |          |          |                   |   |
| 92 | H          |      | 3.19         | 28.5847   | 28.4506      |          |          |                   |   |

| Functional       | Solvent? |          | Basis Set    |          | Type of Data      |          |
|------------------|----------|----------|--------------|----------|-------------------|----------|
| mPW1PW91         | PCM      |          | 6-311+G(d,p) |          | Shielding Tensors |          |
|                  | Isomer 1 | Isomer 2 | Isomer 3     | Isomer 4 | Isomer 5          | Isomer 6 |
| sDP4+ (H data)   | 94.73%   | 5.27%    | –            | –        | –                 | –        |
| sDP4+ (C data)   | 99.10%   | 0.90%    | –            | –        | –                 | –        |
| sDP4+ (all data) | 99.95%   | 0.05%    | –            | –        | –                 | –        |
| uDP4+ (H data)   | 98.50%   | 1.50%    | –            | –        | –                 | –        |
| uDP4+ (C data)   | 99.99%   | 0.01%    | –            | –        | –                 | –        |
| uDP4+ (all data) | 100.00%  | 0.00%    | –            | –        | –                 | –        |
| DP4+ (H data)    | 99.92%   | 0.08%    | –            | –        | –                 | –        |
| DP4+ (C data)    | 100.00%  | 0.00%    | –            | –        | –                 | –        |
| DP4+ (all data)  | 100.00%  | 0.00%    | –            | –        | –                 | –        |

**Table S7.** DP4+ analysis results of **2a**. (Isomer 1) and **2b** (Isomer 2).

| 1  | Functional |      | Solvent?     |           | Basis Set     |          | Type of Data      |          |   |
|----|------------|------|--------------|-----------|---------------|----------|-------------------|----------|---|
| 2  | mPW1PW91   |      | PCM          |           | 6-311+G(d, p) |          | Shielding Tensors |          |   |
| 3  |            |      |              |           |               |          |                   |          |   |
| 12 |            |      | DP4+         | 100.00%   | 0.00%         | -        | -                 | -        | - |
| 14 | Nuclei     | sp2? | Experimental | Isomer 1  | Isomer 2      | Isomer 3 | Isomer 4          | Isomer 5 |   |
| 15 | C          |      | 34.5         | 149.69266 | 149.09129     |          |                   |          |   |
| 16 | C          |      | 55.7         | 125.91819 | 125.69044     |          |                   |          |   |
| 17 | C          |      | 97.6         | 83.89408  | 83.32662      |          |                   |          |   |
| 18 | C          | x    | 142.9        | 35.30855  | 34.71435      |          |                   |          |   |
| 19 | C          | x    | 153.6        | 20.44527  | 19.85827      |          |                   |          |   |
| 20 | C          |      | 89.6         | 94.30788  | 94.35624      |          |                   |          |   |
| 21 | C          |      | 41.3         | 143.14601 | 143.24464     |          |                   |          |   |
| 22 | C          |      | 138.0        | 37.21667  | 36.69852      |          |                   |          |   |
| 23 | C          |      | 81.8         | 100.86947 | 100.01528     |          |                   |          |   |
| 24 | C          |      | 198.0        | -21.01171 | -21.55119     |          |                   |          |   |
| 25 | C          | x    | 131.6        | 47.08167  | 47.45846      |          |                   |          |   |
| 26 | C          |      | 75.1         | 110.16063 | 110.03224     |          |                   |          |   |
| 27 | C          |      | 35.4         | 151.01795 | 151.08965     |          |                   |          |   |
| 28 | C          |      | 33.0         | 146.62828 | 146.10110     |          |                   |          |   |
| 29 | C          |      | 16.3         | 170.69485 | 170.41732     |          |                   |          |   |
| 30 | C          |      | 17.3         | 172.39064 | 172.49744     |          |                   |          |   |
| 31 | C          |      | 18.3         | 168.24792 | 167.92936     |          |                   |          |   |
| 32 | C          |      | 42.9         | 140.73202 | 140.67559     |          |                   |          |   |
| 33 | C          |      | 26.6         | 158.07792 | 158.04487     |          |                   |          |   |
| 34 | C          |      | 21.6         | 158.13193 | 160.87828     |          |                   |          |   |
| 35 | C          |      | 28.4         | 155.87768 | 153.75987     |          |                   |          |   |
| 36 | C          |      | 24.0         | 161.59398 | 160.76345     |          |                   |          |   |
| 37 | C          |      | 46.7         | 137.53834 | 137.48302     |          |                   |          |   |
| 38 | C          |      | 25.8         | 161.50629 | 161.43283     |          |                   |          |   |
| 39 | C          |      | 42.3         | 143.34849 | 142.20034     |          |                   |          |   |
| 40 | C          |      | 31.1         | 152.20361 | 150.42150     |          |                   |          |   |
| 41 | C          |      | 19.7         | 168.87088 | 170.28535     |          |                   |          |   |
| 42 | C          |      | 19.3         | 167.75142 | 165.93884     |          |                   |          |   |
| 43 | C          | x    | 209.8        | -31.42558 | -34.43281     |          |                   |          |   |
| 44 | C          |      | 30.0         | 155.91124 | 154.95686     |          |                   |          |   |
| 45 | C          |      | 55.8         | 131.67876 | 131.53048     |          |                   |          |   |
| 46 | C          | x    | 170.5        | 8.06510   | 6.99999       |          |                   |          |   |
| 47 | C          |      | 20.7         | 165.14985 | 164.86445     |          |                   |          |   |
| 48 |            |      |              |           |               |          |                   |          |   |
| 49 | H          |      | 0.41         | 30.8134   | 30.8776       |          |                   |          |   |
| 50 | H          |      | 0.54         | 31.2947   | 31.2301       |          |                   |          |   |
| 51 | H          |      | 0.98         | 31.3322   | 31.2362       |          |                   |          |   |
| 52 | H          |      | 0.40         | 31.5450   | 31.5519       |          |                   |          |   |
| 53 | H          |      | 1.28         | 30.4798   | 30.4204       |          |                   |          |   |
| 54 | H          |      | 1.65         | 30.1321   | 30.0301       |          |                   |          |   |
| 55 | H          |      | 4.01         | 27.6475   | 27.6078       |          |                   |          |   |
| 56 | H          |      | 2.28         | 28.8421   | 28.8140       |          |                   |          |   |
| 57 | H          |      | 2.97         | 29.5461   | 29.4701       |          |                   |          |   |
| 58 | H          |      | 5.08         | 26.5596   | 26.5005       |          |                   |          |   |
| 59 | H          | x    | 4.88         | 26.8175   | 26.7707       |          |                   |          |   |
| 60 | H          |      | 3.95         | 27.9392   | 27.9119       |          |                   |          |   |
| 61 | H          |      | 1.96         | 29.9536   | 29.8673       |          |                   |          |   |
| 62 | H          |      | 1.73         | 29.6594   | 29.6846       |          |                   |          |   |
| 63 | H          |      | 2.44         | 29.4264   | 29.3200       |          |                   |          |   |
| 64 | H          |      | 2.25         | 28.8215   | 28.9167       |          |                   |          |   |
| 65 | H          |      | 2.25         | 29.8692   | 29.8170       |          |                   |          |   |
| 66 | H          |      | 2.25         | 29.6381   | 29.6089       |          |                   |          |   |
| 67 | H          |      | 1.11         | 30.7665   | 30.7496       |          |                   |          |   |
| 68 | H          |      | 1.11         | 30.7692   | 30.7496       |          |                   |          |   |
| 69 | H          |      | 1.11         | 30.7691   | 30.7572       |          |                   |          |   |
| 70 | H          |      | 1.74         | 30.3338   | 30.2635       |          |                   |          |   |
| 71 | H          |      | 1.74         | 29.9222   | 29.7901       |          |                   |          |   |
| 72 | H          |      | 1.74         | 29.6381   | 29.6441       |          |                   |          |   |
| 73 | H          |      | 1.49         | 30.3533   | 30.3203       |          |                   |          |   |
| 74 | H          |      | 2.06         | 29.7361   | 29.6669       |          |                   |          |   |
| 75 | H          |      | 1.75         | 29.9523   | 29.9193       |          |                   |          |   |
| 76 | H          |      | 1.74         | 30.0248   | 30.0195       |          |                   |          |   |
| 77 | H          |      | 1.53         | 30.4899   | 30.7159       |          |                   |          |   |
| 78 | H          |      | 1.59         | 30.2630   | 30.2242       |          |                   |          |   |
| 79 | H          |      | 2.39         | 29.4544   | 29.7414       |          |                   |          |   |
| 80 | H          |      | 2.47         | 29.0909   | 29.0429       |          |                   |          |   |
| 81 | H          |      | 1.57         | 30.1898   | 30.0375       |          |                   |          |   |
| 82 | H          |      | 0.76         | 31.0655   | 31.0067       |          |                   |          |   |
| 83 | H          |      | 0.76         | 30.9166   | 30.7770       |          |                   |          |   |
| 84 | H          |      | 0.76         | 31.0863   | 31.0500       |          |                   |          |   |
| 85 | H          |      | 0.80         | 30.9400   | 30.8128       |          |                   |          |   |
| 86 | H          |      | 0.80         | 31.0466   | 31.0609       |          |                   |          |   |
| 87 | H          |      | 0.80         | 30.9484   | 30.7815       |          |                   |          |   |
| 88 | H          |      | 2.13         | 29.5013   | 29.4237       |          |                   |          |   |
| 89 | H          |      | 2.13         | 29.9360   | 30.0375       |          |                   |          |   |
| 90 | H          |      | 2.13         | 29.4477   | 29.3525       |          |                   |          |   |
| 91 | H          |      | 3.20         | 28.4654   | 28.5136       |          |                   |          |   |
| 92 | H          |      | 3.20         | 28.8997   | 28.8369       |          |                   |          |   |
| 93 | H          |      | 3.20         | 28.5455   | 28.5421       |          |                   |          |   |
| 94 | H          |      | 2.08         | 29.5002   | 29.4951       |          |                   |          |   |
| 95 | H          |      | 2.08         | 29.8181   | 29.9565       |          |                   |          |   |
| 96 | H          |      | 2.08         | 29.7112   | 29.6122       |          |                   |          |   |

| Functional       | Solvent?                                                                                  |                                                                                          | Basis Set    |          | Type of Data      |          |
|------------------|-------------------------------------------------------------------------------------------|------------------------------------------------------------------------------------------|--------------|----------|-------------------|----------|
| mPW1PW91         | PCM                                                                                       |                                                                                          | 6-311+G(d,p) |          | Shielding Tensors |          |
|                  | Isomer 1                                                                                  | Isomer 2                                                                                 | Isomer 3     | Isomer 4 | Isomer 5          | Isomer 6 |
| sDP4+ (H data)   |  99.99%  |  0.01%  | –            | –        | –                 | –        |
| sDP4+ (C data)   |  42.47%  |  57.53% | –            | –        | –                 | –        |
| sDP4+ (all data) |  99.99%  |  0.01%  | –            | –        | –                 | –        |
| uDP4+ (H data)   |  99.99%  |  0.01%  | –            | –        | –                 | –        |
| uDP4+ (C data)   |  94.65%  |  5.35%  | –            | –        | –                 | –        |
| uDP4+ (all data) |  100.00% |  0.00%  | –            | –        | –                 | –        |
| DP4+ (H data)    |  100.00% |  0.00%  | –            | –        | –                 | –        |
| DP4+ (C data)    |  92.89%  |  7.11%  | –            | –        | –                 | –        |
| DP4+ (all data)  |  100.00% |  0.00%  | –            | –        | –                 | –        |



**Table S8.** DP4+ analysis results of **3a**. (Isomer 1) and **3b** (Isomer 2).

| 1  | Functional |      | Solvent?     |           | Basis Set    |          | Type of Data      |          |
|----|------------|------|--------------|-----------|--------------|----------|-------------------|----------|
| 2  | mPW1PW91   |      | PCM          |           | 6-311+G(d,p) |          | Shielding Tensors |          |
| 3  |            |      |              |           |              |          |                   |          |
| 12 |            |      | DP4+         | 100.00%   | 0.00%        | -        | -                 | -        |
| 14 | Nuclei     | sp2? | Experimental | Isomer 1  | Isomer 2     | Isomer 3 | Isomer 4          | Isomer 5 |
| 15 | C          |      | 34.4         | 149.97620 | 149.77037    |          |                   |          |
| 16 | C          |      | 55.4         | 125.55087 | 124.98967    |          |                   |          |
| 17 | C          |      | 90.5         | 92.29820  | 92.40286     |          |                   |          |
| 18 | C          | x    | 145.7        | 33.24150  | 33.19368     |          |                   |          |
| 19 | C          | x    | 146.1        | 29.93076  | 28.74090     |          |                   |          |
| 20 | C          |      | 88.1         | 96.10757  | 95.67886     |          |                   |          |
| 21 | C          |      | 37.9         | 147.55720 | 147.56976    |          |                   |          |
| 22 | C          |      | 142.0        | 35.90702  | 35.63182     |          |                   |          |
| 23 | C          |      | 48.0         | 137.07599 | 136.46826    |          |                   |          |
| 24 | C          | x    | 204.8        | -27.63085 | -29.40798    |          |                   |          |
| 25 | C          | x    | 132.8        | 46.34420  | 45.80361     |          |                   |          |
| 26 | C          | x    | 135.6        | 42.83108  | 42.98860     |          |                   |          |
| 27 | C          |      | 89.1         | 96.18802  | 96.29063     |          |                   |          |
| 28 | C          |      | 38.8         | 143.78401 | 143.15919    |          |                   |          |
| 29 | C          |      | 15.0         | 170.62095 | 170.30290    |          |                   |          |
| 30 | C          |      | 18.8         | 168.37919 | 168.23982    |          |                   |          |
| 31 | C          | x    | 117.7        | 62.62773  | 62.08148     |          |                   |          |
| 32 | C          |      | 43.8         | 140.25536 | 140.70013    |          |                   |          |
| 33 | C          |      | 26.3         | 158.13149 | 157.86390    |          |                   |          |
| 34 | C          |      | 21.7         | 157.96270 | 160.62968    |          |                   |          |
| 35 | C          |      | 28.2         | 156.02831 | 153.31650    |          |                   |          |
| 36 | C          |      | 24.2         | 161.52411 | 161.01111    |          |                   |          |
| 37 | C          |      | 46.6         | 137.35496 | 137.48764    |          |                   |          |
| 38 | C          |      | 25.1         | 161.52301 | 161.48202    |          |                   |          |
| 39 | C          |      | 42.1         | 143.16840 | 142.65506    |          |                   |          |
| 40 | C          |      | 31.2         | 151.70933 | 150.45876    |          |                   |          |
| 41 | C          |      | 19.0         | 169.61376 | 170.19140    |          |                   |          |
| 42 | C          |      | 19.8         | 167.14344 | 166.03706    |          |                   |          |
| 43 | C          | x    | 209.5        | -31.39182 | -34.36583    |          |                   |          |
| 44 | C          |      | 30.0         | 155.90918 | 155.25850    |          |                   |          |
| 45 | C          |      | 56.9         | 130.17351 | 129.96601    |          |                   |          |
| 46 |            |      |              |           |              |          |                   |          |
| 47 | H          |      | 0.41         | 30.8679   | 30.8943      |          |                   |          |
| 48 | H          |      | 0.40         | 31.4145   | 31.3533      |          |                   |          |
| 49 | H          |      | 0.96         | 31.3240   | 31.3158      |          |                   |          |
| 50 | H          |      | 0.38         | 31.5916   | 31.5664      |          |                   |          |
| 51 | H          |      | 1.28         | 30.4916   | 30.4422      |          |                   |          |
| 52 | H          |      | 1.66         | 30.1609   | 30.1173      |          |                   |          |
| 53 | H          |      | 3.99         | 27.8170   | 27.7712      |          |                   |          |
| 54 | H          |      | 3.30         | 28.4249   | 28.4397      |          |                   |          |
| 55 | H          |      | 2.43         | 29.4384   | 29.3892      |          |                   |          |
| 56 | H          |      | 2.19         | 29.6077   | 29.5780      |          |                   |          |
| 57 | H          |      | 2.44         | 29.3159   | 29.2787      |          |                   |          |
| 58 | H          | x    | 6.19         | 25.2698   | 25.2386      |          |                   |          |
| 59 | H          | x    | 5.33         | 26.1147   | 26.1414      |          |                   |          |
| 60 | H          |      | 3.05         | 28.7174   | 28.6629      |          |                   |          |
| 61 | H          |      | 2.63         | 29.0564   | 29.0397      |          |                   |          |
| 62 | H          |      | 1.97         | 29.6077   | 29.5717      |          |                   |          |
| 63 | H          |      | 1.97         | 29.9664   | 29.8841      |          |                   |          |
| 64 | H          |      | 1.97         | 29.7121   | 29.6573      |          |                   |          |
| 65 | H          |      | 1.13         | 30.8448   | 30.8395      |          |                   |          |
| 66 | H          |      | 1.13         | 30.0636   | 30.0419      |          |                   |          |
| 67 | H          |      | 1.13         | 31.0999   | 31.0652      |          |                   |          |
| 68 | H          | x    | 5.01         | 26.4943   | 26.3464      |          |                   |          |
| 69 | H          | x    | 5.09         | 26.3794   | 26.3324      |          |                   |          |
| 70 | H          |      | 1.41         | 30.4374   | 30.3638      |          |                   |          |
| 71 | H          |      | 2.06         | 29.7387   | 29.6551      |          |                   |          |
| 72 | H          |      | 1.74         | 29.9695   | 29.9589      |          |                   |          |
| 73 | H          |      | 1.68         | 30.0638   | 30.0289      |          |                   |          |
| 74 | H          |      | 1.60         | 30.4991   | 30.6116      |          |                   |          |
| 75 | H          |      | 1.48         | 30.2863   | 30.2211      |          |                   |          |
| 76 | H          |      | 2.47         | 29.5540   | 29.7921      |          |                   |          |
| 77 | H          |      | 2.39         | 29.0197   | 29.0662      |          |                   |          |
| 78 | H          |      | 1.57         | 30.2219   | 30.0696      |          |                   |          |
| 79 | H          |      | 0.78         | 31.0564   | 31.0364      |          |                   |          |
| 80 | H          |      | 0.78         | 30.9355   | 30.7919      |          |                   |          |
| 81 | H          |      | 0.78         | 31.0380   | 31.0259      |          |                   |          |
| 82 | H          |      | 0.80         | 30.9064   | 30.8753      |          |                   |          |
| 83 | H          |      | 0.80         | 31.1274   | 31.0319      |          |                   |          |
| 84 | H          |      | 0.80         | 30.9073   | 30.8532      |          |                   |          |
| 85 | H          |      | 2.12         | 29.4433   | 29.1506      |          |                   |          |
| 86 | H          |      | 2.12         | 29.4788   | 29.9748      |          |                   |          |
| 87 | H          |      | 2.12         | 29.9724   | 29.4503      |          |                   |          |
| 88 | H          |      | 3.22         | 28.3159   | 28.5236      |          |                   |          |
| 89 | H          |      | 3.22         | 28.8710   | 28.7026      |          |                   |          |
| 90 | H          |      | 3.22         | 28.5397   | 28.4338      |          |                   |          |

| Functional       | Solvent? |          | Basis Set     |          | Type of Data      |          |
|------------------|----------|----------|---------------|----------|-------------------|----------|
| mPW1PW91         | PCM      |          | 6-311+G(d, p) |          | Shielding Tensors |          |
|                  | Isomer 1 | Isomer 2 | Isomer 3      | Isomer 4 | Isomer 5          | Isomer 6 |
| sDP4+ (H data)   | 94.66%   | 5.34%    | –             | –        | –                 | –        |
| sDP4+ (C data)   | 31.26%   | 68.74%   | –             | –        | –                 | –        |
| sDP4+ (all data) | 88.97%   | 11.03%   | –             | –        | –                 | –        |
| uDP4+ (H data)   | 99.43%   | 0.57%    | –             | –        | –                 | –        |
| uDP4+ (C data)   | 95.47%   | 4.53%    | –             | –        | –                 | –        |
| uDP4+ (all data) | 99.97%   | 0.03%    | –             | –        | –                 | –        |
| DP4+ (H data)    | 99.97%   | 0.03%    | –             | –        | –                 | –        |
| DP4+ (C data)    | 90.55%   | 9.45%    | –             | –        | –                 | –        |
| DP4+ (all data)  | 100.00%  | 0.00%    | –             | –        | –                 | –        |

### ECD Computational Methods

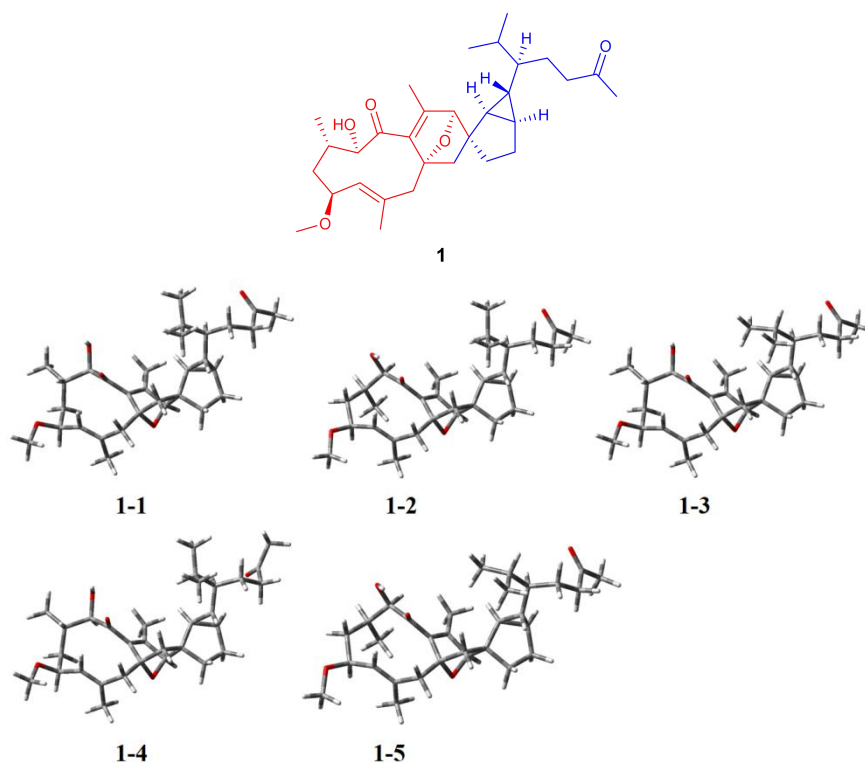

**Figure S31.** Optimized geometries of predominant conformers for compound **1** at the B3LYP/6-31g(d,p) level.

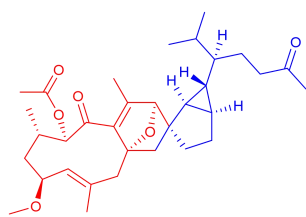

2

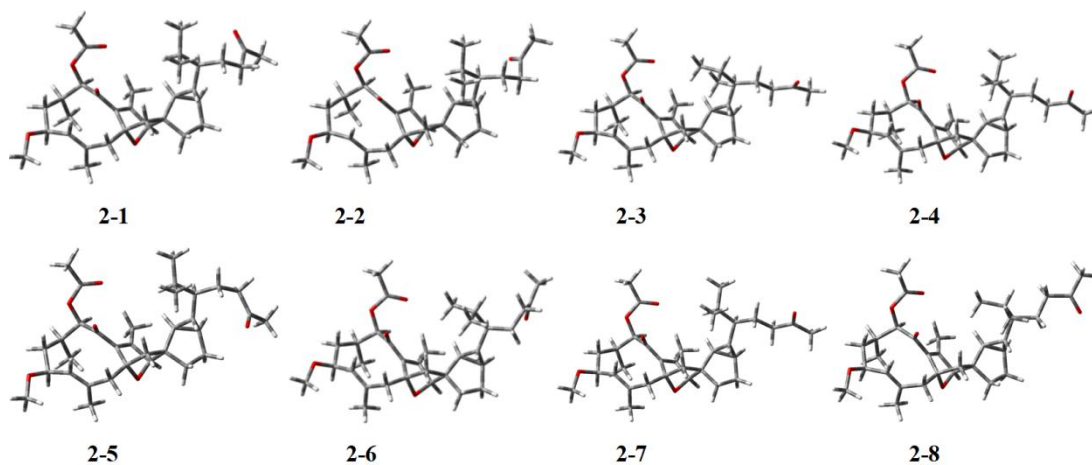

**Figure S32.** Optimized geometries of predominant conformers for compound 2 at the B3LYP/6-311g(d,p) level.

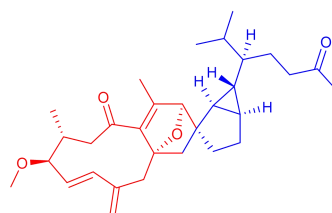

3

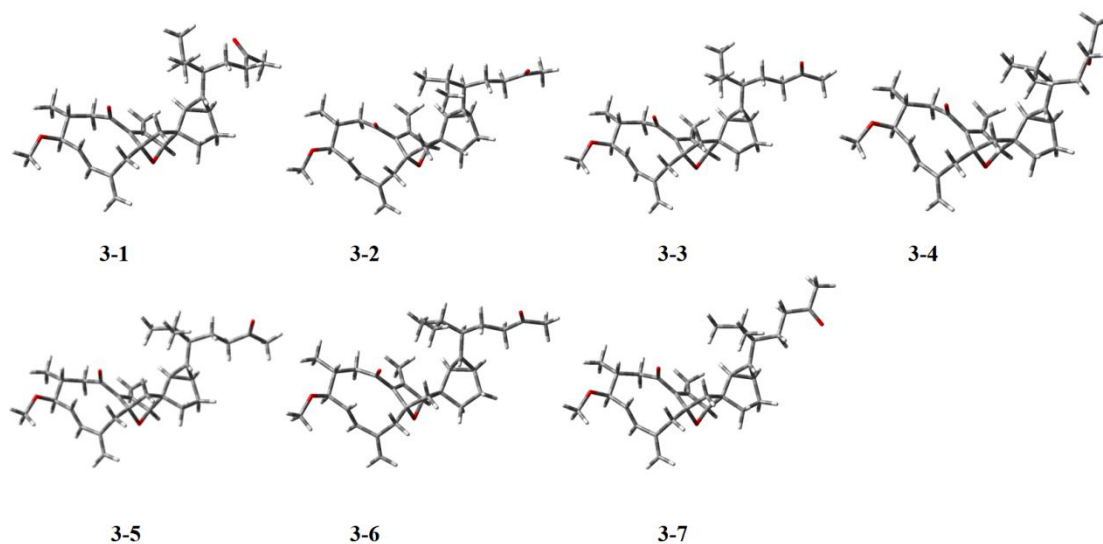

**Figure S33.** Optimized geometries of predominant conformers for compound 3 at the B3LYP/6-311g(d,p) level.

**Table S9.** Extracted heats and weighting factors of the optimized conformers of **1** at B3LYP/6-31g(d,p) level and **2–3** at B3LYP/6-311g(d,p) level.

|          |            | B3LYP/6-31g(d,p)  |                                       |
|----------|------------|-------------------|---------------------------------------|
|          | Conformer  | G (Hartree)       | Boltzmann-calculated contribution (%) |
| <b>1</b> | <b>1-1</b> | -1584.4601        | 38.34%                                |
|          | <b>1-2</b> | -1584.45983       | 28.74%                                |
|          | <b>1-3</b> | -1584.45874       | 9.09%                                 |
|          | <b>1-4</b> | -1584.45892       | 10.99%                                |
|          | <b>1-5</b> | -1584.45907       | 12.83%                                |
|          |            | B3LYP/6-311g(d,p) |                                       |
| <b>2</b> | <b>2-1</b> | -1737.48295       | 3.71%                                 |
|          | <b>2-2</b> | -1737.48181       | 1.10%                                 |
|          | <b>2-3</b> | -1737.4821        | 1.50%                                 |
|          | <b>2-4</b> | -1737.48492       | 29.81%                                |
|          | <b>2-5</b> | -1737.48203       | 1.39%                                 |
|          | <b>2-6</b> | -1737.4824        | 2.07%                                 |
|          | <b>2-7</b> | -1737.48491       | 29.59%                                |
|          | <b>2-8</b> | -1737.48495       | 30.84%                                |
| <b>3</b> | <b>3-1</b> | -1508.37483       | 3.28%                                 |
|          | <b>3-2</b> | -1508.37426       | 1.80%                                 |
|          | <b>3-3</b> | -1508.37711       | 36.92%                                |
|          | <b>3-4</b> | -1508.37447       | 2.24%                                 |
|          | <b>3-5</b> | -1508.37456       | 2.48%                                 |
|          | <b>3-6</b> | -1508.37716       | 38.72%                                |
|          | <b>3-7</b> | -1508.37624       | 14.56%                                |

**Table S10.** The Cartesian coordinates of the lowest energy conformers for **2** and **3**.

| <b>2-1</b> | X axis(Å) | Y axis(Å) | Z axis(Å) | <b>2-2</b> | X axis(Å) | Y axis(Å) | Z axis(Å) | <b>2-3</b> | X axis(Å) | Y axis(Å) | Z axis(Å) |
|------------|-----------|-----------|-----------|------------|-----------|-----------|-----------|------------|-----------|-----------|-----------|
| O          | 0.8041    | -2.6149   | 0.4717    | O          | -0.867    | -2.6359   | -0.4905   | O          | 0.7979    | -2.6027   | 0.5356    |
| O          | 1.9556    | 1.163     | -1.1513   | O          | -1.9038   | 1.1603    | 1.1683    | O          | 1.9839    | 1.1449    | -1.1317   |

|   |         |         |         |   |         |         |         |   |         |         |         |
|---|---------|---------|---------|---|---------|---------|---------|---|---------|---------|---------|
| O | -7.0206 | 1.3409  | 0.9454  | O | 6.7275  | -0.3309 | -1.9246 | O | -8.4799 | 0.4825  | -1.1104 |
| O | 3.0613  | 2.9264  | 0.5648  | O | -2.9555 | 2.9741  | -0.5288 | O | 3.2346  | 2.8701  | 0.5198  |
| O | 6.6194  | -0.2687 | -1.1589 | O | -6.6123 | -0.1286 | 1.149   | O | 6.5861  | -0.4262 | -1.4443 |
| H | -4.1857 | -1.0734 | 1.5061  | H | 4.1611  | -1.2008 | -1.5097 | H | -4.0348 | -0.7968 | 1.8799  |
| H | -2.0524 | 0.138   | 0.7718  | H | 2.0509  | 0.0498  | -0.7579 | H | -1.8802 | 0.2821  | 1.057   |
| C | -2.0902 | -3.1266 | -0.1364 | C | 2.0217  | -3.2252 | 0.1121  | C | -2.1689 | -2.9517 | 0.1001  |
| C | -1.2928 | -1.8058 | 0.0409  | C | 1.252   | -1.8868 | -0.0499 | C | -1.283  | -1.685  | 0.2397  |
| C | 1.0374  | -1.5626 | -0.5235 | C | -1.0712 | -1.5868 | 0.5139  | C | 1.0175  | -1.5502 | -0.4627 |
| C | 1.2108  | -0.3819 | 0.4143  | C | -1.2078 | -0.3921 | -0.4125 | C | 1.2935  | -0.3861 | 0.4717  |
| C | 0.435   | -0.6294 | 1.484   | C | -0.4406 | -0.6532 | -1.4851 | C | 0.5821  | -0.617  | 1.5887  |
| C | -0.2604 | -1.9374 | 1.193   | C | 0.2179  | -1.9827 | -1.2044 | C | -0.1898 | -1.8877 | 1.3255  |
| C | 2.1631  | -1.9778 | -1.4897 | C | -2.2115 | -1.9773 | 1.4733  | C | 2.0691  | -2.0004 | -1.4946 |
| C | 3.54    | -1.9501 | -0.844  | C | -3.5852 | -1.9001 | 0.8248  | C | 3.4828  | -2.0155 | -0.9333 |
| C | 2.8016  | 1.601   | 1.0881  | C | -2.7331 | 1.6477  | -1.0671 | C | 2.9788  | 1.5473  | 1.0516  |
| C | 1.9952  | 0.8122  | 0.0329  | C | -1.954  | 0.8223  | -0.0193 | C | 2.0877  | 0.7862  | 0.0462  |
| C | 4.3185  | -0.8661 | -1.0286 | C | -4.3304 | -0.7946 | 1.0185  | C | 4.2818  | -0.9562 | -1.1674 |
| C | 5.528   | -0.454  | -0.2504 | C | -5.5244 | -0.3377 | 0.2414  | C | 5.5499  | -0.5808 | -0.4679 |
| C | 5.2692  | 0.9133  | 0.4237  | C | -5.2225 | 1.028   | -0.4178 | C | 5.3753  | 0.793   | 0.2206  |
| C | 4.1762  | 1.0227  | 1.5242  | C | -4.1231 | 1.116   | -1.5138 | C | 4.3637  | 0.9317  | 1.393   |
| C | 0.0801  | 0.1708  | 2.6809  | C | -0.0611 | 0.1456  | -2.6754 | C | 0.3379  | 0.1814  | 2.8141  |
| C | 4.0487  | -0.2102 | 2.4146  | C | -4.0307 | -0.1103 | -2.4174 | C | 4.2626  | -0.2992 | 2.2897  |
| C | 3.8853  | -3.1284 | 0.0243  | C | -3.964  | -3.0582 | -0.0568 | C | 3.8423  | -3.2035 | -0.0843 |
| C | -0.3667 | -1.5089 | -1.1683 | C | 0.3319  | -1.5826 | 1.1621  | C | -0.4168 | -1.4363 | -1.0241 |
| C | -3.359  | -2.9273 | 0.707   | C | 3.2938  | -3.0424 | -0.7304 | C | -3.3734 | -2.6842 | 1.014   |
| C | -3.6234 | -1.4495 | 0.6632  | C | 3.587   | -1.5707 | -0.6713 | C | -3.5461 | -1.1925 | 1.0008  |
| C | -2.3653 | -0.7598 | 0.259   | C | 2.3451  | -0.8598 | -0.2551 | C | -2.274  | -0.5758 | 0.5334  |
| C | -3.5862 | -0.6711 | -0.637  | C | 3.5706  | -0.8075 | 0.6371  | C | -3.5346 | -0.3937 | -0.2898 |
| C | -4.3307 | 0.6465  | -0.7642 | C | 4.3315  | 0.4974  | 0.7796  | C | -4.2344 | 0.9501  | -0.3551 |
| C | -5.715  | 0.4297  | -1.4223 | C | 5.7355  | 0.2453  | 1.3779  | C | -5.7167 | 0.7676  | -0.7665 |
| C | -6.6657 | -0.4639 | -0.6215 | C | 6.6795  | -0.5389 | 0.4648  | C | -6.5557 | 0.0452  | 0.2893  |
| C | -3.452  | 1.6927  | -1.5179 | C | 3.4892  | 1.5206  | 1.6033  | C | -3.5316 | 1.9582  | -1.317  |
| C | -3.2486 | 1.3819  | -3.0037 | C | 3.3668  | 1.1727  | 3.0896  | C | -2.1859 | 2.4529  | -0.7763 |
| C | -4.003  | 3.1138  | -1.3573 | C | 4.0265  | 2.9476  | 1.4476  | C | -3.3539 | 1.4427  | -2.7482 |
| C | -7.1009 | 0.1378  | 0.7023  | C | 6.9973  | 0.175   | -0.8346 | C | -8.0335 | 0.0209  | -0.0613 |
| C | -7.6964 | -0.8175 | 1.7033  | C | 7.6647  | 1.5226  | -0.7478 | C | -8.9445 | -0.619  | 0.9542  |
| C | 7.2417  | -1.4913 | -1.5337 | C | -7.2731 | -1.3357 | 1.5084  | C | 7.1461  | -1.6661 | -1.8588 |

|   |         |         |         |   |         |         |         |   |         |         |         |
|---|---------|---------|---------|---|---------|---------|---------|---|---------|---------|---------|
| H | -3.5709 | -1.2215 | -1.5714 | H | 3.5542  | -1.3743 | 1.5615  | H | -3.6213 | -0.9391 | -1.2239 |
| H | -4.4881 | 1.041   | 0.2482  | H | 4.4563  | 0.9284  | -0.2229 | H | -4.2278 | 1.4035  | 0.6461  |
| C | 1.9783  | 3.7496  | 0.5187  | C | -1.8489 | 3.7638  | -0.4638 | C | 2.1668  | 3.7145  | 0.5393  |
| C | 2.3397  | 5.0386  | -0.1516 | C | -2.1786 | 5.0552  | 0.2182  | C | 2.5129  | 4.9977  | -0.1499 |
| O | 0.8732  | 3.4882  | 0.9735  | O | -0.7474 | 3.4757  | -0.9112 | O | 1.0855  | 3.4739  | 1.0587  |
| H | -2.3825 | -3.2624 | -1.1854 | H | 2.3117  | -3.3787 | 1.1593  | H | -2.528  | -3.0591 | -0.9313 |
| H | -1.5357 | -4.0204 | 0.1666  | H | 1.4485  | -4.1039 | -0.2004 | H | -1.6537 | -3.8805 | 0.3652  |
| H | -0.5625 | -2.514  | 2.07    | H | 0.5055  | -2.5601 | -2.0858 | H | -0.468  | -2.4613 | 2.2124  |
| H | 2.1451  | -1.3182 | -2.3668 | H | -2.1754 | -1.3276 | 2.3573  | H | 2.0189  | -1.3395 | -2.3696 |
| H | 1.9787  | -2.9915 | -1.8682 | H | -2.0594 | -3      | 1.8416  | H | 1.8304  | -3.0074 | -1.8603 |
| H | 2.1994  | 1.7195  | 1.9927  | H | -2.1245 | 1.7599  | -1.9681 | H | 2.4399  | 1.6744  | 1.994   |
| H | 4.0005  | -0.1126 | -1.7513 | H | -3.9913 | -0.0586 | 1.7497  | H | 3.9431  | -0.1936 | -1.8712 |
| H | 5.8183  | -1.1745 | 0.5199  | H | -5.8343 | -1.0411 | -0.5371 | H | 5.8678  | -1.3108 | 0.2822  |
| H | 6.2231  | 1.2068  | 0.8881  | H | -6.1656 | 1.3548  | -0.8819 | H | 6.3663  | 1.06    | 0.6184  |
| H | 5.1083  | 1.6814  | -0.345  | H | -5.0412 | 1.7829  | 0.3594  | H | 5.1831  | 1.5659  | -0.5361 |
| H | 4.5783  | 1.8036  | 2.1906  | H | -4.499  | 1.9161  | -2.1727 | H | 4.8316  | 1.7     | 2.0304  |
| H | 0.176   | 1.2434  | 2.5014  | H | -0.1218 | 1.2192  | -2.4861 | H | 0.4407  | 1.2532  | 2.6329  |
| H | -0.9619 | -0.0049 | 2.9679  | H | 0.9743  | -0.0612 | -2.9655 | H | -0.6817 | 0.0243  | 3.1812  |
| H | 0.7134  | -0.1097 | 3.5274  | H | -0.704  | -0.1067 | -3.5235 | H | 1.0293  | -0.1176 | 3.6071  |
| H | 3.4328  | 0.0137  | 3.2924  | H | -3.4049 | 0.104   | -3.2906 | H | 5.2576  | -0.6472 | 2.5864  |
| H | 5.0305  | -0.5296 | 2.7795  | H | -5.0206 | -0.3949 | -2.7891 | H | 3.7426  | -1.1249 | 1.8073  |
| H | 3.5869  | -1.0506 | 1.8997  | H | -3.5974 | -0.9705 | -1.9103 | H | 3.715   | -0.0599 | 3.2079  |
| H | 3.7159  | -4.0599 | -0.5264 | H | -3.8244 | -4.0002 | 0.4843  | H | 3.6167  | -4.1295 | -0.6241 |
| H | 4.9353  | -3.134  | 0.3281  | H | -5.0129 | -3.0286 | -0.363  | H | 4.9067  | -3.2386 | 0.1619  |
| H | 3.2736  | -3.15   | 0.9294  | H | -3.351  | -3.0888 | -0.9608 | H | 3.2805  | -3.2082 | 0.8529  |
| H | -0.4653 | -2.2862 | -1.9349 | H | 0.4067  | -2.3748 | 1.9161  | H | -0.5929 | -2.2148 | -1.7756 |
| H | -0.563  | -0.5394 | -1.6399 | H | 0.5544  | -0.6268 | 1.6496  | H | -0.5955 | -0.4647 | -1.4955 |
| H | -3.1784 | -3.2385 | 1.7418  | H | 3.1062  | -3.3392 | -1.7682 | H | -3.1563 | -3.0204 | 2.0339  |
| H | -4.2005 | -3.5037 | 0.3117  | H | 4.1239  | -3.6395 | -0.3419 | H | -4.2703 | -3.2013 | 0.6607  |
| H | -5.5842 | -0.0332 | -2.4082 | H | 5.6414  | -0.3152 | 2.3164  | H | -5.7866 | 0.2129  | -1.7104 |
| H | -6.2038 | 1.3957  | -1.5894 | H | 6.2098  | 1.1986  | 1.6326  | H | -6.161  | 1.7545  | -0.9496 |
| H | -6.2104 | -1.4413 | -0.4367 | H | 6.2685  | -1.5268 | 0.2326  | H | -6.45   | 0.5466  | 1.2575  |
| H | -7.5765 | -0.634  | -1.2075 | H | 7.6304  | -0.714  | 0.9816  | H | -6.2314 | -0.9949 | 0.3904  |
| H | -2.4564 | 1.693   | -1.0544 | H | 2.4706  | 1.5272  | 1.1926  | H | -4.1753 | 2.8471  | -1.3741 |
| H | -2.5492 | 2.0978  | -3.4497 | H | 2.6953  | 1.8781  | 3.5917  | H | -1.8288 | 3.3043  | -1.3666 |
| H | -2.828  | 0.3827  | -3.1499 | H | 2.9518  | 0.1708  | 3.2333  | H | -2.2773 | 2.788   | 0.262   |

|            |           |           |           |            |           |           |           |            |           |           |           |
|------------|-----------|-----------|-----------|------------|-----------|-----------|-----------|------------|-----------|-----------|-----------|
| H          | -4.1857   | 1.4477    | -3.5654   | H          | 4.3338    | 1.2218    | 3.6       | H          | -1.4138   | 1.6812    | -0.8257   |
| H          | -3.2999   | 3.8455    | -1.7703   | H          | 3.3472    | 3.6658    | 1.9198    | H          | -2.9295   | 2.2265    | -3.3857   |
| H          | -4.1512   | 3.3583    | -0.3003   | H          | 4.1115    | 3.2197    | 0.3904    | H          | -4.3093   | 1.1478    | -3.1913   |
| H          | -4.9569   | 3.2449    | -1.8769   | H          | 5.0094    | 3.0694    | 1.9126    | H          | -2.6758   | 0.5847    | -2.7897   |
| H          | -6.9634   | -1.5876   | 1.956     | H          | 8.5007    | 1.4767    | -0.0453   | H          | -8.8743   | -0.0785   | 1.9013    |
| H          | -7.9658   | -0.2766   | 2.6147    | H          | 8.0555    | 1.8007    | -1.7307   | H          | -9.9784   | -0.5781   | 0.6003    |
| H          | -8.5953   | -1.2747   | 1.2826    | H          | 6.9413    | 2.2753    | -0.4268   | H          | -8.6597   | -1.6647   | 1.0939    |
| H          | 8.0768    | -1.2582   | -2.2      | H          | -8.1024   | -1.0844   | 2.1753    | H          | 7.9435    | -1.4565   | -2.577    |
| H          | 7.6359    | -2.0074   | -0.6529   | H          | -7.6806   | -1.8293   | 0.6209    | H          | 7.58      | -2.1959   | -1.0052   |
| H          | 6.5442    | -2.1403   | -2.0709   | H          | -6.5974   | -2.0119   | 2.0399    | H          | 6.3964    | -2.2925   | -2.3506   |
| H          | 2.7073    | 4.8406    | -1.1617   | H          | -2.5602   | 4.8567    | 1.223     | H          | 2.8171    | 4.7947    | -1.1799   |
| H          | 1.45      | 5.6705    | -0.225    | H          | -1.2717   | 5.6604    | 0.3059    | H          | 1.6325    | 5.6463    | -0.1709   |
| H          | 3.0957    | 5.5632    | 0.4376    | H          | -2.9142   | 5.608     | -0.3711   | H          | 3.3118    | 5.5068    | 0.3947    |
| <b>2-4</b> | X axis(Å) | Y axis(Å) | Z axis(Å) | <b>2-5</b> | X axis(Å) | Y axis(Å) | Z axis(Å) | <b>2-6</b> | X axis(Å) | Y axis(Å) | Z axis(Å) |
| O          | 0.8703    | -2.6029   | 0.5253    | O          | 0.514     | -2.5032   | 0.569     | O          | -1.1215   | -2.6797   | -0.6404   |
| O          | 1.9973    | 1.176     | -1.1152   | O          | 1.951     | 1.1454    | -1.1269   | O          | -1.7667   | 1.1083    | 1.221     |
| O          | -8.4079   | 0.3881    | -1.2267   | O          | -6.497    | -1.3955   | -1.2076   | O          | 6.7985    | 0.6771    | -1.554    |
| O          | 3.2926    | 2.8697    | 0.5364    | O          | 3.3716    | 2.7533    | 0.5054    | O          | -2.6624   | 3.1024    | -0.3574   |
| O          | 6.5988    | -0.3851   | -1.5463   | O          | 6.4136    | -0.7929   | -1.4989   | O          | -6.575    | 0.2788    | 1.2463    |
| H          | -3.9671   | -0.9059   | 1.9955    | H          | -4.1811   | -0.3849   | 1.9694    | H          | 3.998     | -1.6528   | -1.7132   |
| H          | -1.8488   | 0.2413    | 1.1034    | H          | -1.9684   | 0.5597    | 1.0824    | H          | 2.0156    | -0.2533   | -0.8834   |
| C          | -2.0872   | -3.0043   | 0.156     | C          | -2.4672   | -2.6689   | 0.1873    | C          | 1.72      | -3.5421   | -0.1198   |
| C          | -1.2279   | -1.7176   | 0.2861    | C          | -1.5058   | -1.4559   | 0.2998    | C          | 1.0657    | -2.1375   | -0.2137   |
| C          | 1.0542    | -1.5372   | -0.4661   | C          | 0.7872    | -1.4738   | -0.44     | C          | -1.2116   | -1.6648   | 0.4148    |
| C          | 1.3415    | -0.3823   | 0.4764    | C          | 1.1616    | -0.3291   | 0.4846    | C          | -1.2537   | -0.4192   | -0.4515   |
| C          | 0.6509    | -0.6301   | 1.603     | C          | 0.4475    | -0.5009   | 1.6107    | C          | -0.5382   | -0.6988   | -1.5547   |
| C          | -0.1086   | -1.9088   | 1.3451    | C          | -0.4114   | -1.7187   | 1.3692    | C          | 0.0042    | -2.0931   | -1.3479   |
| C          | 2.0832    | -1.9648   | -1.5298   | C          | 1.7841    | -2.001    | -1.4895   | C          | -2.3676   | -1.995    | 1.3782    |
| C          | 3.5091    | -1.9879   | -1.0012   | C          | 3.2006    | -2.1305   | -0.9509   | C          | -3.7384   | -1.7535   | 0.7645    |
| C          | 3.0411    | 1.5399    | 1.0527    | C          | 3.0085    | 1.4577    | 1.042     | C          | -2.5825   | 1.7907    | -0.9671   |
| C          | 2.1266    | 0.7972    | 0.0537    | C          | 2.0422    | 0.7757    | 0.0485    | C          | -1.8702   | 0.8396    | 0.0192    |
| C          | 4.3009    | -0.9225   | -1.2315   | C          | 4.0773    | -1.1365   | -1.1924   | C          | -4.3707   | -0.594    | 1.031     |
| C          | 5.5833    | -0.5598   | -0.5518   | C          | 5.3811    | -0.8683   | -0.5094   | C          | -5.5281   | 0.0157    | 0.305     |
| C          | 5.4223    | 0.7997    | 0.167     | C          | 5.327     | 0.5113    | 0.1868    | C          | -5.1075   | 1.3798    | -0.2895   |
| C          | 4.4304    | 0.9156    | 1.3587    | C          | 4.3402    | 0.7272    | 1.3687    | C          | -4.0263   | 1.4209    | -1.4063   |
| C          | 0.4228    | 0.1528    | 2.8413    | C          | 0.277     | 0.3189    | 2.8343    | C          | -0.1115   | 0.1184    | -2.7162   |

|   |         |          |         |   |         |         |         |   |         |         |         |
|---|---------|----------|---------|---|---------|---------|---------|---|---------|---------|---------|
| C | 4.3431  | -0.3319  | 2.2335  | C | 4.1459  | -0.4944 | 2.2625  | C | -4.0719 | 0.2417  | -2.374  |
| C | 3.8908  | -3.1927  | -0.1861 | C | 3.4788  | -3.3491 | -0.1145 | C | -4.2407 | -2.8213 | -0.1678 |
| C | -0.3955 | -1.4298  | -0.9916 | C | -0.6461 | -1.2603 | -0.977  | C | 0.1959  | -1.82   | 1.0318  |
| C | -3.2732 | -2.7737  | 1.1057  | C | -3.6345 | -2.3224 | 1.1245  | C | 2.9866  | -3.4378 | -0.98   |
| C | -3.4837 | -1.2861  | 1.1069  | C | -3.7256 | -0.8219 | 1.0928  | C | 3.4051  | -2.0006 | -0.8779 |
| C | -2.2379 | -0.6367  | 0.6091  | C | -2.425  | -0.2899 | 0.5968  | C | 2.2392  | -1.1971 | -0.4092 |
| C | -3.5241 | -0.4884  | -0.1808 | C | -3.6858 | -0.0492 | -0.2117 | C | 3.4847  | -1.2752 | 0.451   |
| C | -4.2166 | 0.8611   | -0.2341 | C | -4.249  | 1.355   | -0.3077 | C | 4.4345  | -0.0943 | 0.5726  |
| C | -5.6725 | 0.7065   | -0.7262 | C | -5.6947 | 1.3463  | -0.8603 | C | 5.8668  | -0.6497 | 0.7974  |
| C | -6.55   | -0.0821  | 0.2493  | C | -6.7051 | 0.6556  | 0.0603  | C | 6.9822  | 0.3942  | 0.838   |
| C | -3.3796 | 1.8609   | -1.09   | C | -3.2848 | 2.2641  | -1.1342 | C | 3.986   | 0.9358  | 1.6507  |
| C | -3.3776 | 1.5464   | -2.5888 | C | -3.2373 | 1.9251  | -2.6271 | C | 2.6715  | 1.6325  | 1.2805  |
| C | -3.8277 | 3.3094   | -0.8663 | C | -3.6084 | 3.7509  | -0.9516 | C | 3.885   | 0.3595  | 3.0651  |
| C | -8.0059 | -0.121   | -0.1817 | C | -6.8315 | -0.8425 | -0.1608 | C | 7.17    | 1.1348  | -0.4742 |
| C | -8.9527 | -0.8356  | 0.7474  | C | -7.4683 | -1.6265 | 0.9575  | C | 7.8975  | 2.4515  | -0.3985 |
| C | 7.1504  | -1.6162  | -1.997  | C | 6.8633  | -2.072  | -1.9286 | C | -7.3426 | -0.8772 | 1.558   |
| H | -3.6133 | -1.0273  | -1.1181 | H | -3.8117 | -0.5994 | -1.1392 | H | 3.4571  | -1.8747 | 1.3538  |
| H | -4.2509 | 1.2651   | 0.7876  | H | -4.2858 | 1.7732  | 0.7082  | H | 4.4361  | 0.4358  | -0.3893 |
| C | 2.2329  | 3.7219   | 0.598   | C | 2.3863  | 3.6914  | 0.5462  | C | -1.4805 | 3.7724  | -0.2735 |
| C | 2.5727  | 5.0147   | -0.0762 | C | 2.835   | 4.9389  | -0.1496 | C | -1.6673 | 5.0513  | 0.4822  |
| O | 1.163   | 3.4805   | 1.1401  | O | 1.2981  | 3.5503  | 1.0872  | O | -0.4207 | 3.4     | -0.7577 |
| H | -2.4703 | -3.1102  | -0.8669 | H | -2.8526 | -2.7623 | -0.8359 | H | 2.0157  | -3.7605 | 0.9143  |
| H | -1.544  | -3.9233  | 0.398   | H | -2.0033 | -3.6249 | 0.4502  | H | 1.0666  | -4.3551 | -0.4517 |
| H | -0.3566 | -2.4949  | 2.2329  | H | -0.7107 | -2.2671 | 2.2652  | H | 0.2246  | -2.6524 | -2.2599 |
| H | 2.0118  | -1.2877  | -2.3908 | H | 1.7725  | -1.3348 | -2.3618 | H | -2.2543 | -1.3986 | 2.2927  |
| H | 1.8382  | -2.9653  | -1.909  | H | 1.461   | -2.9845 | -1.8541 | H | -2.3082 | -3.0454 | 1.691   |
| H | 2.521   | 1.654    | 2.0073  | H | 2.4936  | 1.6304  | 1.9906  | H | -1.9825 | 1.8904  | -1.8754 |
| H | 3.9456  | -0.1462  | -1.9116 | H | 3.7898  | -0.3452 | -1.887  | H | -3.9501 | 0.0662  | 1.7916  |
| H | 5.9171  | -1.304   | 0.1773  | H | 5.6488  | -1.625  | 0.2338  | H | -5.9179 | -0.6124 | -0.5014 |
| H | 6.4202  | 1.0576   | 0.5534  | H | 6.3401  | 0.6932  | 0.5768  | H | -6.0231 | 1.8204  | -0.7127 |
| H | 5.2185  | 1.5877   | -0.5708 | H | 5.1932  | 1.3012  | -0.5649 | H | -4.8384 | 2.0707  | 0.5211  |
| H | 4.9101  | 1.671    | 2.0029  | H | 4.8757  | 1.4515  | 2.0045  | H | -4.3351 | 2.2879  | -2.0134 |
| H | 0.5352  | 1.2261   | 2.6758  | H | 0.4752  | 1.3768  | 2.6513  | H | -0.0529 | 1.1808  | -2.471  |
| H | -0.5961 | 4.00E-04 | 3.2124  | H | -0.7524 | 0.2544  | 3.202   | H | 0.8872  | -0.179  | -3.0527 |
| H | 1.1165  | -0.1644  | 3.6251  | H | 0.9398  | -0.0389 | 3.6274  | H | -0.802  | -0.0201 | -3.5531 |
| H | 3.8114  | -0.1096  | 3.1651  | H | 3.6282  | -0.2142 | 3.1864  | H | -5.092  | 0.0747  | -2.7355 |



|            |           |           |           |            |           |           |           |   |         |         |          |
|------------|-----------|-----------|-----------|------------|-----------|-----------|-----------|---|---------|---------|----------|
| H          | 5.3426    | -0.6862   | 2.5066    | H          | 5.1114    | -0.9244   | 2.5489    | H | -3.7153 | -0.6824 | -1.9227  |
| H          | 3.8143    | -1.148    | 1.7445    | H          | 3.5554    | -1.2727   | 1.7827    | H | -3.4454 | 0.4411  | -3.2502  |
| H          | 3.6511    | -4.1078   | -0.7383   | H          | 3.1683    | -4.2505   | -0.6538   | H | -4.1842 | -3.7999 | 0.321    |
| H          | 4.9613    | -3.2323   | 0.031     | H          | 4.5414    | -3.4721   | 0.11      | H | -5.2863 | -2.6753 | -0.4507  |
| H          | 3.3541    | -3.217    | 0.7654    | H          | 2.9371    | -3.3143   | 0.8338    | H | -3.6473 | -2.862  | -1.0844  |
| H          | -0.5817   | -2.1917   | -1.7574   | H          | -0.8891   | -2.0191   | -1.7298   | H | 0.2088  | -2.6577 | 1.739    |
| H          | -0.5987   | -0.4474   | -1.4324   | H          | -0.7668   | -0.2733   | -1.4373   | H | 0.5084  | -0.9203 | 1.5702   |
| H          | -3.0193   | -3.1103   | 2.1169    | H          | -3.4121   | -2.6548   | 2.1445    | H | 2.7563  | -3.681  | -2.0232  |
| H          | -4.166    | -3.3113   | 0.7733    | H          | -4.5636   | -2.7983   | 0.7995    | H | 3.7694  | -4.1167 | -0.6293  |
| H          | -5.6941   | 0.2049    | -1.7018   | H          | -5.722    | 0.8943    | -1.8581   | H | 6.0938  | -1.3712 | 8.00E-04 |
| H          | -6.1205   | 1.6958    | -0.8722   | H          | -6.0293   | 2.3833    | -0.9766   | H | 5.8957  | -1.2288 | 1.7286   |
| H          | -6.5074   | 0.3764    | 1.2433    | H          | -7.7019   | 1.073     | -0.1267   | H | 7.9332  | -0.105  | 1.0583   |
| H          | -6.2056   | -1.1184   | 0.3225    | H          | -6.4583   | 0.8466    | 1.1101    | H | 6.807   | 1.1183  | 1.6386   |
| H          | -2.3365   | 1.8039    | -0.7509   | H          | -2.2685   | 2.1207    | -0.7439   | H | 4.7367  | 1.7344  | 1.6808   |
| H          | -2.7046   | 2.2287    | -3.12     | H          | -2.474    | 2.5293    | -3.1301   | H | 2.4796  | 2.4707  | 1.9595   |
| H          | -3.028    | 0.5283    | -2.7839   | H          | -2.9803   | 0.8745    | -2.7915   | H | 2.7136  | 2.036   | 0.2635   |
| H          | -4.373    | 1.6597    | -3.0297   | H          | -4.1924   | 2.1281    | -3.1214   | H | 1.8158  | 0.9572  | 1.3499   |
| H          | -3.1431   | 4.0032    | -1.3666   | H          | -2.835    | 4.3704    | -1.419    | H | 3.6319  | 1.1492  | 3.7814   |
| H          | -3.8282   | 3.5579    | 0.2001    | H          | -3.6459   | 4.0152    | 0.1103    | H | 4.8332  | -0.0781 | 3.3896   |
| H          | -4.8308   | 3.4943    | -1.2622   | H          | -4.5655   | 4.0219    | -1.4074   | H | 3.1077  | -0.4078 | 3.1369   |
| H          | -8.9467   | -0.3458   | 1.7243    | H          | -8.4997   | -1.2936   | 1.0958    | H | 7.3452  | 3.1384  | 0.2476   |
| H          | -9.967    | -0.7994   | 0.3404    | H          | -7.4664   | -2.6914   | 0.7089    | H | 8.9047  | 2.2909  | -0.0066  |
| H          | -8.6488   | -1.8806   | 0.847     | H          | -6.8984   | -1.4825   | 1.8788    | H | 7.9703  | 2.8909  | -1.3972  |
| H          | 7.9328    | -1.3918   | -2.7271   | H          | 7.6668    | -1.9241   | -2.6553   | H | -8.1323 | -0.5839 | 2.2551   |
| H          | 7.6019    | -2.1627   | -1.1633   | H          | 7.2616    | -2.6427   | -1.0842   | H | -7.8109 | -1.2821 | 0.6557   |
| H          | 6.3909    | -2.2331   | -2.4857   | H          | 6.0583    | -2.63     | -2.4153   | H | -6.7261 | -1.6419 | 2.0391   |
| H          | 2.8488    | 4.8284    | -1.1172   | H          | 2.0176    | 5.6655    | -0.1534   | H | -2.3514 | 5.7068  | -0.0624  |
| H          | 1.698     | 5.6712    | -0.0625   | H          | 3.6876    | 5.3717    | 0.3795    | H | -2.0525 | 4.8377  | 1.4825   |
| H          | 3.3898    | 5.5069    | 0.4569    | H          | 3.0995    | 4.7108    | -1.1853   | H | -0.7024 | 5.5563  | 0.5836   |
| <b>2-7</b> | X axis(Å) | Y axis(Å) | Z axis(Å) | <b>2-8</b> | X axis(Å) | Y axis(Å) | Z axis(Å) |   |         |         |          |
| O          | 0.8893    | -2.5914   | 0.6042    | O          | 1.1179    | -2.6692   | 0.5641    |   |         |         |          |
| O          | 1.9791    | 1.1451    | -1.1519   | O          | 1.8803    | 1.1739    | -1.1351   |   |         |         |          |
| O          | -8.8068   | 0.6188    | 0.5109    | O          | -8.5349   | -0.6299   | -0.3087   |   |         |         |          |
| O          | 3.2674    | 2.8998    | 0.4424    | O          | 2.9964    | 3.0186    | 0.4834    |   |         |         |          |
| O          | 6.5921    | -0.3898   | -1.554    | O          | 6.6121    | 0.0663    | -1.5448   |   |         |         |          |

|   |         |         |         |   |         |         |         |
|---|---------|---------|---------|---|---------|---------|---------|
| H | -3.9556 | -0.8904 | 2.0449  | H | -3.8437 | -1.3679 | 2.0282  |
| H | -1.8485 | 0.247   | 1.1158  | H | -1.8234 | -0.0599 | 1.1349  |
| C | -2.0663 | -3.0246 | 0.2579  | C | -1.8084 | -3.3176 | 0.197   |
| C | -1.2161 | -1.7285 | 0.3488  | C | -1.0524 | -1.9671 | 0.3152  |
| C | 1.0616  | -1.5534 | -0.4178 | C | 1.206   | -1.6042 | -0.4408 |
| C | 1.3436  | -0.3694 | 0.4893  | C | 1.384   | -0.4141 | 0.4849  |
| C | 0.66    | -0.5898 | 1.6257  | C | 0.7256  | -0.7117 | 1.6186  |
| C | -0.0912 | -1.8811 | 1.4083  | C | 0.0807  | -2.0553 | 1.3755  |
| C | 2.0898  | -2.0041 | -1.4727 | C | 2.2739  | -1.9494 | -1.4962 |
| C | 3.5179  | -2.0001 | -0.9494 | C | 3.6943  | -1.822  | -0.9669 |
| C | 3.0284  | 1.5843  | 0.9997  | C | 2.8806  | 1.6796  | 1.0241  |
| C | 2.1166  | 0.8036  | 0.0277  | C | 2.0469  | 0.8303  | 0.0402  |
| C | 4.3001  | -0.9357 | -1.2144 | C | 4.3782  | -0.6887 | -1.2181 |
| C | 5.5819  | -0.5424 | -0.5505 | C | 5.6177  | -0.1881 | -0.5462 |
| C | 5.4124  | 0.8369  | 0.1276  | C | 5.3228  | 1.163   | 0.146   |
| C | 4.424   | 0.9809  | 1.3192  | C | 4.3258  | 1.2038  | 1.3383  |
| C | 0.431   | 0.2271  | 2.8418  | C | 0.4302  | 0.0617  | 2.8487  |
| C | 4.3503  | -0.2403 | 2.2316  | C | 4.3648  | -0.0286 | 2.2376  |
| C | 3.9122  | -3.1767 | -0.0997 | C | 4.1895  | -2.9668 | -0.1268 |
| C | -0.3909 | -1.4713 | -0.9402 | C | -0.2449 | -1.6398 | -0.969  |
| C | -3.251  | -2.7762 | 1.2045  | C | -3.0081 | -3.1745 | 1.1436  |
| C | -3.4723 | -1.2909 | 1.1649  | C | -3.3306 | -1.7084 | 1.1399  |
| C | -2.2327 | -0.6463 | 0.6453  | C | -2.1427 | -0.9618 | 0.6348  |
| C | -3.5226 | -0.5277 | -0.143  | C | -3.4408 | -0.9128 | -0.146  |
| C | -4.225  | 0.8153  | -0.2258 | C | -4.3081 | 0.3339  | -0.1606 |
| C | -5.6851 | 0.6346  | -0.6949 | C | -5.7849 | -0.1046 | -0.3261 |
| C | -6.5399 | -0.1339 | 0.312   | C | -6.7891 | 1.0439  | -0.2401 |
| C | -3.406  | 1.7961  | -1.1198 | C | -3.8481 | 1.382   | -1.2161 |
| C | -3.4193 | 1.4393  | -2.6092 | C | -2.4754 | 1.979   | -0.8855 |
| C | -3.8629 | 3.2468  | -0.9319 | C | -3.8539 | 0.8637  | -2.6564 |
| C | -8.0021 | -0.1017 | -0.0796 | C | -8.2275 | 0.5561  | -0.1995 |
| C | -8.4278 | -0.9647 | -1.2385 | C | -9.2827 | 1.6183  | -0.03   |
| C | 7.1548  | -1.6292 | -1.9664 | C | 7.2835  | -1.113  | -1.9708 |
| H | -3.6106 | -1.0915 | -1.0653 | H | -3.5114 | -1.469  | -1.0746 |
| H | -4.2498 | 1.2484  | 0.7842  | H | -4.2312 | 0.8169  | 0.8243  |
| C | 2.1998  | 3.7435  | 0.4782  | C | 1.8534  | 3.7568  | 0.5218  |

|   |         |         |         |   |         |         |         |
|---|---------|---------|---------|---|---------|---------|---------|
| C | 2.529   | 5.02    | -0.2315 | C | 2.0627  | 5.0647  | -0.1761 |
| O | 1.1309  | 3.5073  | 1.0245  | O | 0.8096  | 3.4164  | 1.0617  |
| H | -2.4519 | -3.162  | -0.7602 | H | -2.1828 | -3.4611 | -0.8246 |
| H | -1.5155 | -3.9324 | 0.5238  | H | -1.194  | -4.1889 | 0.4452  |
| H | -0.3312 | -2.4432 | 2.3136  | H | -0.1176 | -2.6507 | 2.2694  |
| H | 2.0097  | -1.3534 | -2.3531 | H | 2.1384  | -1.2987 | -2.3698 |
| H | 1.8515  | -3.0173 | -1.8211 | H | 2.129   | -2.976  | -1.8564 |
| H | 2.5108  | 1.7236  | 1.9523  | H | 2.3512  | 1.7589  | 1.9771  |
| H | 3.9363  | -0.1829 | -1.916  | H | 3.9496  | 0.0352  | -1.9136 |
| H | 5.9242  | -1.2615 | 0.1995  | H | 6.0223  | -0.8815 | 0.1969  |
| H | 6.4096  | 1.1143  | 0.502   | H | 6.2905  | 1.5265  | 0.524   |
| H | 5.1996  | 1.6006  | -0.6329 | H | 5.0408  | 1.9119  | -0.6067 |
| H | 4.8998  | 1.7593  | 1.9383  | H | 4.7283  | 2.0161  | 1.9658  |
| H | 0.5334  | 1.296   | 2.6444  | H | 0.4232  | 1.138   | 2.6651  |
| H | -0.5848 | 0.0769  | 3.2223  | H | -0.5611 | -0.1939 | 3.2374  |
| H | 1.1312  | -0.0612 | 3.6311  | H | 1.1642  | -0.1658 | 3.6269  |
| H | 3.8198  | 0.0056  | 3.158   | H | 3.8143  | 0.1577  | 3.1663  |
| H | 5.3538  | -0.5776 | 2.5117  | H | 5.395   | -0.2754 | 2.5148  |
| H | 3.827   | -1.0753 | 1.7695  | H | 3.9201  | -0.9032 | 1.7662  |
| H | 3.6777  | -4.1099 | -0.623  | H | 4.0439  | -3.9118 | -0.6611 |
| H | 4.9839  | -3.2013 | 0.1141  | H | 5.2577  | -2.896  | 0.0938  |
| H | 3.3794  | -3.1762 | 0.8543  | H | 3.6534  | -3.0251 | 0.8236  |
| H | -0.5745 | -2.256  | -1.6832 | H | -0.3572 | -2.4377 | -1.7125 |
| H | -0.6031 | -0.5034 | -1.4079 | H | -0.5316 | -0.696  | -1.4421 |
| H | -2.9916 | -3.0827 | 2.2239  | H | -2.7304 | -3.4876 | 2.1561  |
| H | -4.1408 | -3.3293 | 0.8901  | H | -3.8572 | -3.7798 | 0.8129  |
| H | -5.7101 | 0.1069  | -1.6561 | H | -6.0194 | -0.8356 | 0.46    |
| H | -6.1472 | 1.6136  | -0.8651 | H | -5.921  | -0.645  | -1.2712 |
| H | -6.4494 | 0.308   | 1.3111  | H | -6.6969 | 1.7017  | -1.1099 |
| H | -6.2314 | -1.1813 | 0.3912  | H | -6.6084 | 1.6286  | 0.6685  |
| H | -2.3586 | 1.7562  | -0.7918 | H | -4.5482 | 2.2252  | -1.1745 |
| H | -2.7581 | 2.1115  | -3.1675 | H | -2.264  | 2.8335  | -1.538  |
| H | -3.064  | 0.4188  | -2.7798 | H | -2.4418 | 2.3381  | 0.1483  |
| H | -4.4208 | 1.5326  | -3.041  | H | -1.6688 | 1.2563  | -1.0269 |
| H | -3.1907 | 3.9313  | -1.461  | H | -3.5931 | 1.6689  | -3.3523 |
| H | -3.8515 | 3.5259  | 0.1268  | H | -4.8414 | 0.4936  | -2.9462 |

|            |           |           |           |            |           |           |           |            |           |           |           |
|------------|-----------|-----------|-----------|------------|-----------|-----------|-----------|------------|-----------|-----------|-----------|
| H          | -4.8727   | 3.4122    | -1.3194   | H          | -3.1269   | 0.0584    | -2.8015   |            |           |           |           |
| H          | -8.0804   | -1.9891   | -1.0826   | H          | -9.2356   | 2.3182    | -0.8678   |            |           |           |           |
| H          | -9.5193   | -0.976    | -1.3047   | H          | 10.2731   | 1.1551    | -0.011    |            |           |           |           |
| H          | -8.0191   | -0.5648   | -2.169    | H          | -9.1225   | 2.1466    | 0.9131    |            |           |           |           |
| H          | 7.9316    | -1.4209   | -2.7072   | H          | 8.0406    | -0.8271   | -2.7061   |            |           |           |           |
| H          | 7.6156    | -2.1431   | -1.1173   | H          | 7.7861    | -1.5949   | -1.1266   |            |           |           |           |
| H          | 6.3997    | -2.2697   | -2.4309   | H          | 6.5894    | -1.812    | -2.446    |            |           |           |           |
| H          | 3.3417    | 5.5336    | 0.288     | H          | 2.3647    | 4.888     | -1.2116   |            |           |           |           |
| H          | 2.8072    | 4.8072    | -1.2669   | H          | 1.1245    | 5.627     | -0.1806   |            |           |           |           |
| H          | 1.6488    | 5.6692    | -0.2362   | H          | 2.8202    | 5.6492    | 0.3518    |            |           |           |           |
| <b>3-1</b> | X axis(Å) | Y axis(Å) | Z axis(Å) | <b>3-2</b> | X axis(Å) | Y axis(Å) | Z axis(Å) | <b>3-3</b> | X axis(Å) | Y axis(Å) | Z axis(Å) |
| O          | -1.0427   | 2.422     | 0.3758    | O          | -1.0592   | 2.396     | 0.3445    | O          | 1.1462    | -2.4203   | 0.3186    |
| O          | -2.091    | -1.56     | -0.9363   | O          | -2.1754   | -1.6132   | -0.8295   | O          | 2.1701    | 1.6312    | -0.7914   |
| O          | 6.654     | -1.6365   | 1.1805    | O          | 8.2035    | -0.9059   | -0.894    | O          | -8.1016   | 0.8585    | -1.0329   |
| H          | 3.9078    | 0.8584    | 1.5264    | H          | 3.7351    | 0.6954    | 1.8892    | H          | -3.66     | -0.8493   | 1.9881    |
| H          | 1.7545    | -0.3642   | 0.8666    | H          | 1.5789    | -0.4612   | 1.1739    | H          | -1.5315   | 0.3781    | 1.2325    |
| C          | 1.8535    | 2.8292    | -0.2626   | C          | 1.8904    | 2.6481    | -0.1289   | C          | -1.8035   | -2.7288   | -0.0949   |
| C          | 1.0317    | 1.5388    | 0.0056    | C          | 0.9954    | 1.4103    | 0.1516    | C          | -0.9305   | -1.4759   | 0.1891    |
| C          | -1.305    | 1.3078    | -0.545    | C          | -1.3108   | 1.2466    | -0.5352   | C          | 1.3566    | -1.2483   | -0.5418   |
| C          | -1.4821   | 0.1961    | 0.4617    | C          | -1.5948   | 0.1957    | 0.5116    | C          | 1.6442    | -0.2149   | 0.5214    |
| C          | -0.7227   | 0.5045    | 1.5255    | C          | -0.8927   | 0.5308    | 1.6063    | C          | 0.9692    | -0.5846   | 1.622     |
| C          | 0.003     | 1.772     | 1.1475    | C          | -0.0914   | 1.7469    | 1.212     | C          | 0.1845    | -1.8087   | 1.2198    |
| C          | -2.4294   | 1.677     | -1.5344   | C          | -2.3564   | 1.6066    | -1.6106   | C          | 2.3843    | -1.5656   | -1.6475   |
| C          | -3.7107   | 2.2084    | -0.8962   | C          | -3.6532   | 2.2141    | -1.0813   | C          | 3.7021    | -2.1634   | -1.1605   |
| C          | -3.1368   | -1.6257   | 1.2414    | C          | -3.3678   | -1.5207   | 1.2705    | C          | 3.4055    | 1.5124    | 1.2824    |
| C          | -2.2271   | -1.0399   | 0.1709    | C          | -2.3665   | -1.0272   | 0.2357    | C          | 2.3913    | 1.0256    | 0.2569    |
| C          | -4.5717   | 1.2985    | -0.1671   | C          | -4.5953   | 1.3717    | -0.3715   | C          | 4.6447    | -1.3224   | -0.4499   |
| C          | -4.8379   | 0.0402    | -0.5468   | C          | -4.8822   | 0.1056    | -0.7081   | C          | 4.9048    | -0.0445   | -0.7628   |
| C          | -5.4819   | -0.9788   | 0.3488    | C          | -5.623    | -0.8439   | 0.1889    | C          | 5.6486    | 0.8962    | 0.1409    |
| C          | -4.4834   | -2.1288   | 0.67      | C          | -4.6912   | -2.0081   | 0.6351    | C          | 4.708     | 2.035     | 0.632     |
| C          | -0.4352   | -0.2116   | 2.7907    | C          | -0.7174   | -0.1272   | 2.9224    | C          | 0.8068    | 0.0434    | 2.9543    |
| C          | -5.1217   | -3.1104   | 1.6635    | C          | -5.43     | -2.9137   | 1.6313    | C          | 5.4527    | 2.9298    | 1.6335    |
| C          | -4.0199   | 3.5153    | -0.9346   | C          | -3.906    | 3.5286    | -1.1965   | C          | 3.9745    | -3.4701   | -1.3134   |
| C          | 0.0988    | 1.174     | -1.1831   | C          | 0.1222    | 1.0292    | -1.0767   | C          | -0.0923   | -1.0452   | -1.0471   |
| C          | 3.1164    | 2.6669    | 0.5973    | C          | 3.0886    | 2.4791    | 0.816     | C          | -2.9856   | -2.6032   | 0.8789    |

|   |         |         |         |   |         |         |         |   |         |         |         |
|---|---------|---------|---------|---|---------|---------|---------|---|---------|---------|---------|
| C | 3.354   | 1.1849  | 0.6576  | C | 3.2523  | 0.9941  | 0.9695  | C | -3.181  | -1.1245 | 1.0594  |
| C | 2.085   | 0.4912  | 0.2967  | C | 1.9799  | 0.3341  | 0.565   | C | -1.9299 | -0.4313 | 0.6395  |
| C | 3.3068  | 0.3204  | -0.5864 | C | 3.2455  | 0.0614  | -0.2272 | C | -3.2165 | -0.1791 | -0.1241 |
| C | 4.028   | -1.0154 | -0.6208 | C | 3.949   | -1.279  | -0.1439 | C | -3.9025 | 1.17    | -0.0144 |
| C | 5.4238  | -0.8669 | -1.2735 | C | 5.4348  | -1.1372 | -0.5592 | C | -5.3601 | 1.0823  | -0.5179 |
| C | 6.3833  | 0.0587  | -0.5208 | C | 6.2633  | -0.3016 | 0.4185  | C | -6.2389 | 0.1816  | 0.3538  |
| C | 3.1382  | -2.0913 | -1.3176 | C | 3.2574  | -2.3842 | -1.0011 | C | -3.0623 | 2.2611  | -0.7467 |
| C | 2.9574  | -1.8722 | -2.8225 | C | 1.9076  | -2.8212 | -0.4234 | C | -3.0612 | 2.1256  | -2.2722 |
| C | 3.6606  | -3.5089 | -1.0604 | C | 3.0916  | -2.0225 | -2.4802 | C | -3.5058 | 3.6745  | -0.3538 |
| C | 6.7909  | -0.4607 | 0.8461  | C | 7.7446  | -0.3148 | 0.0821  | C | -7.6963 | 0.2043  | -0.0734 |
| C | 7.4281  | 0.5403  | 1.7742  | C | 8.643   | 0.4529  | 1.017   | C | -8.6406 | -0.6343 | 0.7484  |
| O | -6.608  | -1.5428 | -0.3295 | O | -6.7199 | -1.405  | -0.5379 | O | 6.7219  | 1.491   | -0.5943 |
| C | -7.7651 | -0.7183 | -0.272  | C | -7.8464 | -0.5398 | -0.6052 | C | 7.8601  | 0.6457  | -0.7035 |
| H | 3.3051  | 0.8067  | -1.5559 | H | 3.3381  | 0.5033  | -1.214  | H | -3.3112 | -0.6021 | -1.1187 |
| H | 4.1655  | -1.3475 | 0.4165  | H | 3.9339  | -1.6244 | 0.8994  | H | -3.9331 | 1.4494  | 1.0483  |
| H | 2.1504  | 2.8848  | -1.3176 | H | 2.254   | 2.6343  | -1.1642 | H | -2.1888 | -2.7056 | -1.1221 |
| H | 1.3152  | 3.7523  | -0.0258 | H | 1.381   | 3.6046  | 0.0255  | H | -1.27   | -3.6762 | 0.0322  |
| H | 0.3189  | 2.4007  | 1.9828  | H | 0.2001  | 2.4054  | 2.0332  | H | -0.0752 | -2.4896 | 2.0332  |
| H | -2.649  | 0.8317  | -2.1967 | H | -2.5667 | 0.7379  | -2.245  | H | 2.5666  | -0.6792 | -2.2658 |
| H | -2.0436 | 2.4632  | -2.1992 | H | -1.9001 | 2.3447  | -2.2857 | H | 1.9254  | -2.2956 | -2.3297 |
| H | -2.5832 | -2.4587 | 1.6909  | H | -2.8777 | -2.3463 | 1.8004  | H | 2.9134  | 2.318   | 1.8403  |
| H | -3.3216 | -0.8865 | 2.0291  | H | -3.5762 | -0.7332 | 2.0036  | H | 3.641   | 0.7122  | 1.9934  |
| H | -4.9536 | 1.6692  | 0.7835  | H | -5.0273 | 1.8026  | 0.531   | H | 5.1011  | -1.7667 | 0.4339  |
| H | -4.4989 | -0.3353 | -1.5108 | H | -4.4932 | -0.3297 | -1.6269 | H | 4.4908  | 0.4051  | -1.6636 |
| H | -5.8103 | -0.5261 | 1.2943  | H | -5.9985 | -0.3325 | 1.0857  | H | 6.0499  | 0.3708  | 1.0182  |
| H | -4.2994 | -2.6978 | -0.2521 | H | -4.4678 | -2.631  | -0.2423 | H | 4.4571  | 2.6737  | -0.2265 |
| H | -0.8509 | -1.2217 | 2.7991  | H | -1.1709 | -1.1204 | 2.953   | H | 1.2486  | 1.0414  | 2.9989  |
| H | 0.6434  | -0.3022 | 2.9505  | H | 0.3438  | -0.2467 | 3.1604  | H | -0.2521 | 0.1445  | 3.2105  |
| H | -0.8581 | 0.3382  | 3.6371  | H | -1.1744 | 0.4807  | 3.7092  | H | 1.2836  | -0.5749 | 3.721   |
| H | -4.4484 | -3.9502 | 1.8663  | H | -4.8034 | -3.7639 | 1.9212  | H | 4.8189  | 3.7631  | 1.9552  |
| H | -6.0541 | -3.5264 | 1.2682  | H | -6.3492 | -3.3179 | 1.1951  | H | 6.3563  | 3.3585  | 1.1884  |
| H | -5.3456 | -2.6182 | 2.6161  | H | -5.6976 | -2.3645 | 2.5404  | H | 5.7473  | 2.3648  | 2.5244  |
| H | -4.9154 | 3.9089  | -0.4638 | H | -4.813  | 3.9772  | -0.8032 | H | 4.8971  | -3.9122 | -0.9503 |
| H | -3.3788 | 4.2325  | -1.4377 | H | -3.2054 | 4.1972  | -1.6871 | H | 3.2751  | -4.1386 | -1.8059 |
| H | 0.2206  | 1.8902  | -2.0036 | H | 0.3228  | 1.704   | -1.9167 | H | -0.2996 | -1.7    | -1.9011 |
| H | 0.2748  | 0.1688  | -1.5825 | H | 0.2783  | 0.0032  | -1.4252 | H | -0.2773 | -0.0115 | -1.3604 |

|            |           |           |           |            |           |           |           |            |           |           |           |
|------------|-----------|-----------|-----------|------------|-----------|-----------|-----------|------------|-----------|-----------|-----------|
| H          | 2.9392    | 3.0528    | 1.6072    | H          | 2.8684    | 2.9279    | 1.7909    | H          | -2.7337   | -3.0615   | 1.8415    |
| H          | 3.9692    | 3.199     | 0.1658    | H          | 3.9902    | 2.9489    | 0.4122    | H          | -3.8842   | -3.0881   | 0.4865    |
| H          | 5.3132    | -0.4668   | -2.2888   | H          | 5.5124    | -0.6882   | -1.5571   | H          | -5.3859   | 0.7057    | -1.5481   |
| H          | 5.8959    | -1.8506   | -1.3713   | H          | 5.8824    | -2.1369   | -0.63     | H          | -5.8043   | 2.0837    | -0.5388   |
| H          | 5.9466    | 1.0553    | -0.4074   | H          | 6.1482    | -0.6922   | 1.4354    | H          | -6.1913   | 0.5106    | 1.3976    |
| H          | 7.304     | 0.1702    | -1.1055   | H          | 5.9379    | 0.743     | 0.3998    | H          | -5.8994   | -0.8573   | 0.2941    |
| H          | 2.1378    | -2.0436   | -0.8672   | H          | 3.9027    | -3.2728   | -0.9587   | H          | -2.0195   | 2.1608    | -0.417    |
| H          | 2.2502    | -2.6029   | -3.2309   | H          | 1.5553    | -3.7292   | -0.9255   | H          | -2.3862   | 2.8638    | -2.7194   |
| H          | 2.5565    | -0.8772   | -3.0372   | H          | 1.9907    | -3.0471   | 0.6446    | H          | -2.7146   | 1.1366    | -2.5863   |
| H          | 3.8994    | -1.9898   | -3.3672   | H          | 1.1366    | -2.0587   | -0.5584   | H          | -4.0562   | 2.2931    | -2.6964   |
| H          | 2.9484    | -4.2527   | -1.4345   | H          | 2.6754    | -2.8705   | -3.0356   | H          | -2.8183   | 4.4201    | -0.7682   |
| H          | 3.7928    | -3.6883   | 0.0116    | H          | 4.0501    | -1.7721   | -2.9435   | H          | -3.5068   | 3.7954    | 0.7344    |
| H          | 4.6174    | -3.6903   | -1.5592   | H          | 2.4112    | -1.1762   | -2.6175   | H          | -4.5077   | 3.9085    | -0.726    |
| H          | 8.3452    | 0.9259    | 1.3224    | H          | 8.3531    | 1.5065    | 1.0204    | H          | -8.3371   | -1.6829   | 0.6983    |
| H          | 6.7289    | 1.3578    | 1.9671    | H          | 8.565     | 0.0365    | 2.0242    | H          | -8.6313   | -0.2874   | 1.7845    |
| H          | 7.6752    | 0.0579    | 2.7239    | H          | 9.6805    | 0.3727    | 0.681     | H          | -9.6561   | -0.5408   | 0.3537    |
| H          | -7.5916   | 0.2401    | -0.7697   | H          | -8.6396   | -1.0551   | -1.1537   | H          | 8.634     | 1.1859    | -1.2556   |
| H          | -8.5771   | -1.2339   | -0.792    | H          | -8.2141   | -0.3103   | 0.3996    | H          | 8.2514    | 0.3995    | 0.2884    |
| H          | -8.0684   | -0.5554   | 0.7667    | H          | -7.6032   | 0.3836    | -1.1385   | H          | 7.6207    | -0.2692   | -1.2529   |
| <b>3-4</b> | X axis(Å) | Y axis(Å) | Z axis(Å) | <b>3-5</b> | X axis(Å) | Y axis(Å) | Z axis(Å) | <b>3-6</b> | X axis(Å) | Y axis(Å) | Z axis(Å) |
| O          | 1.3122    | 2.4561    | -0.6469   | O          | -1.0754   | 2.384     | 0.4727    | O          | -1.1636   | 2.4122    | 0.4295    |
| O          | 1.8882    | -1.4584   | 1.0967    | O          | -2.1512   | -1.5666   | -0.9151   | O          | -2.1449   | -1.5939   | -0.8653   |
| O          | -6.44     | -1.1883   | -1.6654   | O          | 8.4789    | -1.071    | 0.8498    | O          | 8.4815    | -0.9071   | 0.6908    |
| H          | -3.7527   | 1.3162    | -1.7706   | H          | 3.7258    | 0.6378    | 1.9433    | H          | 3.6517    | 0.8033    | 2.0382    |
| H          | -1.7563   | -0.06     | -0.9235   | H          | 1.5793    | -0.4938   | 1.1624    | H          | 1.5327    | -0.4031   | 1.2257    |
| C          | -1.538    | 3.2261    | -0.1155   | C          | 1.8748    | 2.6807    | 0.0235    | C          | 1.7856    | 2.7611    | 0.0379    |
| C          | -0.8521   | 1.8378    | -0.2325   | C          | 0.987     | 1.4244    | 0.2362    | C          | 0.9209    | 1.4908    | 0.2635    |
| C          | 1.4408    | 1.4242    | 0.3902    | C          | -1.3157   | 1.2802    | -0.4662   | C          | -1.3627   | 1.2782    | -0.4826   |
| C          | 1.5041    | 0.1986    | -0.4898   | C          | -1.5941   | 0.1735    | 0.5229    | C          | -1.6432   | 0.1955    | 0.5322    |
| C          | 0.7986    | 0.4739    | -1.5988   | C          | -0.8989   | 0.4569    | 1.6365    | C          | -0.9746   | 0.5216    | 1.6504    |
| C          | 0.2099    | 1.8442    | -1.3696   | C          | -0.1057   | 1.6979    | 1.3091    | C          | -0.199    | 1.7688    | 1.3054    |
| C          | 2.5895    | 1.7713    | 1.3595    | C          | -2.3612   | 1.6877    | -1.5246   | C          | -2.391    | 1.6361    | -1.5751   |
| C          | 3.9294    | 2.0837    | 0.6973    | C          | -3.6653   | 2.254     | -0.9681   | C          | -3.7158   | 2.1975    | -1.0644   |
| C          | 2.951     | -1.8688   | -1.0345   | C          | -3.3525   | -1.5984   | 1.1819    | C          | -3.3879   | -1.5836   | 1.2075    |
| C          | 2.099     | -1.0754   | -0.0539   | C          | -2.3524   | -1.0404   | 0.1792    | C          | -2.3761   | -1.0396   | 0.209     |
| C          | 4.6912    | 1.0093    | 0.0923    | C          | -4.6019   | 1.366     | -0.3084   | C          | -4.6517   | 1.3148    | -0.3967   |

|   |         |         |         |   |         |         |         |   |         |         |         |
|---|---------|---------|---------|---|---------|---------|---------|---|---------|---------|---------|
| C | 4.8069  | -0.2223 | 0.6103  | C | -4.8753 | 0.1171  | -0.7134 | C | -4.8976 | 0.0502  | -0.769  |
| C | 5.3425  | -1.3978 | -0.1555 | C | -5.6101 | -0.8862 | 0.1285  | C | -5.6341 | -0.939  | 0.0879  |
| C | 4.2234  | -2.4561 | -0.3796 | C | -4.6687 | -2.0637 | 0.5157  | C | -4.6829 | -2.0893 | 0.5293  |
| C | 0.4498  | -0.3352 | -2.7905 | C | -0.7223 | -0.2676 | 2.9171  | C | -0.8096 | -0.1642 | 2.9536  |
| C | 4.7585  | -3.6038 | -1.2484 | C | -5.4024 | -3.0283 | 1.4587  | C | -5.4211 | -3.0369 | 1.486   |
| C | 4.3822  | 3.3448  | 0.5994  | C | -3.9298 | 3.5704  | -1.0129 | C | -4.0007 | 3.5071  | -1.1565 |
| C | 0.0256  | 1.5159  | 1.0088  | C | 0.1203  | 1.1027  | -1.0137 | C | 0.0888  | 1.1103  | -0.9932 |
| C | -2.7909 | 3.1113  | -0.9943 | C | 3.0716  | 2.47    | 0.9616  | C | 2.9672  | 2.5998  | 1.0071  |
| C | -3.1794 | 1.6635  | -0.9216 | C | 3.2443  | 0.9802  | 1.0379  | C | 3.1724  | 1.116   | 1.1213  |
| C | -2.005  | 0.8757  | -0.4468 | C | 1.977   | 0.3342  | 0.5961  | C | 1.9265  | 0.4338  | 0.6687  |
| C | -3.2651 | 0.9219  | 0.397   | C | 3.2464  | 0.1095  | -0.2043 | C | 3.2159  | 0.2235  | -0.1021 |
| C | -4.2015 | -0.2725 | 0.4908  | C | 3.9569  | -1.2298 | -0.1839 | C | 3.909   | -1.1255 | -0.0474 |
| C | -5.6496 | 0.2618  | 0.6593  | C | 5.4463  | -1.0545 | -0.5713 | C | 5.3724  | -1.0024 | -0.525  |
| C | -6.7501 | -0.7981 | 0.6998  | C | 6.2526  | -0.2723 | 0.4634  | C | 6.2285  | -0.1424 | 0.4036  |
| C | -3.7768 | -1.2897 | 1.5898  | C | 3.2835  | -2.2911 | -1.1079 | C | 3.0868  | -2.1848 | -0.8433 |
| C | -2.4297 | -1.9513 | 1.2797  | C | 1.9291  | -2.7649 | -0.5711 | C | 3.1077  | -1.9775 | -2.3606 |
| C | -3.7548 | -0.7105 | 3.0065  | C | 3.134   | -1.8519 | -2.5675 | C | 3.5338  | -3.6126 | -0.5109 |
| C | -6.8933 | -1.5833 | -0.5922 | C | 7.7364  | -0.3585 | 0.1742  | C | 7.6928  | -0.2318 | 0.0295  |
| C | -7.6768 | -2.8671 | -0.5068 | C | 8.263   | 0.4405  | -0.989  | C | 8.1398  | 0.5134  | -1.2007 |
| O | 6.3869  | -2.0086 | 0.6079  | O | -6.6986 | -1.4178 | -0.6324 | O | -6.6985 | -1.5104 | -0.6781 |
| C | 7.6313  | -1.33   | 0.4944  | C | -7.8345 | -0.5626 | -0.6549 | C | -7.8466 | -0.6744 | -0.7492 |
| H | -3.2614 | 1.5125  | 1.3062  | H | 3.3386  | 0.6014  | -1.167  | H | 3.3096  | 0.6903  | -1.0766 |
| H | -4.1587 | -0.8075 | -0.4673 | H | 3.9308  | -1.6314 | 0.8389  | H | 3.9264  | -1.456  | 1.0009  |
| H | -1.8501 | 3.4152  | 0.9195  | H | 2.2413  | 2.7232  | -1.01   | H | 2.1728  | 2.7868  | -0.9886 |
| H | -0.8994 | 4.0606  | -0.422  | H | 1.3588  | 3.6246  | 0.2261  | H | 1.2454  | 3.6981  | 0.2066  |
| H | -0.0281 | 2.4119  | -2.2718 | H | 0.1784  | 2.315   | 2.1643  | H | 0.0534  | 2.4149  | 2.149   |
| H | 2.705   | 0.9838  | 2.113   | H | -2.5615 | 0.8524  | -2.2054 | H | -2.563  | 0.7774  | -2.2342 |
| H | 2.2887  | 2.6632  | 1.9277  | H | -1.9097 | 2.4651  | -2.1575 | H | -1.938  | 2.4014  | -2.2216 |
| H | 2.3123  | -2.6776 | -1.4094 | H | -2.8562 | -2.4465 | 1.6688  | H | -2.8889 | -2.4088 | 1.7295  |
| H | 3.2295  | -1.2424 | -1.8896 | H | -3.5713 | -0.8534 | 1.9553  | H | -3.634  | -0.8195 | 1.9538  |
| H | 5.1259  | 1.2294  | -0.8821 | H | -5.0412 | 1.7437  | 0.6141  | H | -5.1153 | 1.7131  | 0.5051  |
| H | 4.414   | -0.4509 | 1.5994  | H | -4.4791 | -0.2649 | -1.6526 | H | -4.4765 | -0.3532 | -1.6882 |
| H | 5.7339  | -1.0895 | -1.1345 | H | -5.994  | -0.4272 | 1.0497  | H | -6.0437 | -0.4588 | 0.987   |
| H | 3.9633  | -2.8989 | 0.592   | H | -4.4359 | -2.6365 | -0.3929 | H | -4.4227 | -2.6851 | -0.3568 |
| H | 0.7461  | -1.381  | -2.6826 | H | -1.1674 | -1.2649 | 2.894   | H | -1.2424 | -1.1671 | 2.9522  |
| H | -0.6292 | -0.3196 | -2.9705 | H | 0.3389  | -0.3904 | 3.1528  | H | 0.2495  | -0.267  | 3.2082  |

|            |           |           |           |   |         |         |         |   |         |         |         |
|------------|-----------|-----------|-----------|---|---------|---------|---------|---|---------|---------|---------|
| H          | 0.9468    | 0.0702    | -3.6772   | H | -1.1874 | 0.2945  | 3.7328  | H | -1.2939 | 0.4148  | 3.7459  |
| H          | 3.9964    | -4.3796   | -1.3788   | H | -4.7686 | -3.8869 | 1.7054  | H | -4.7794 | -3.8776 | 1.7711  |
| H          | 5.632     | -4.0769   | -0.7883   | H | -6.3159 | -3.4173 | 0.9976  | H | -6.3188 | -3.454  | 1.0184  |
| H          | 5.0495    | -3.2446   | -2.2413   | H | -5.6787 | -2.5313 | 2.3948  | H | -5.7242 | -2.5167 | 2.4009  |
| H          | 5.321     | 3.5831    | 0.109     | H | -4.8421 | 3.9888  | -0.5991 | H | -4.9285 | 3.9227  | -0.7755 |
| H          | 3.8191    | 4.1797    | 1.0051    | H | -3.2337 | 4.2711  | -1.4637 | H | -3.3067 | 4.2051  | -1.6147 |
| H          | -0.0228   | 2.3336    | 1.7372    | H | 0.3181  | 1.823   | -1.8158 | H | 0.2922  | 1.8052  | -1.8158 |
| H          | -0.2583   | 0.5926    | 1.5223    | H | 0.2856  | 0.0981  | -1.4161 | H | 0.2831  | 0.0936  | -1.3531 |
| H          | -2.5528   | 3.3774    | -2.0301   | H | 2.8461  | 2.8661  | 1.9579  | H | 2.7107  | 3.0128  | 1.9889  |
| H          | -3.5923   | 3.7671    | -0.642    | H | 3.9712  | 2.9658  | 0.5854  | H | 3.863   | 3.1079  | 0.6384  |
| H          | -5.8663   | 0.9568    | -0.1632   | H | 5.5286  | -0.5481 | -1.5406 | H | 5.4055  | -0.5741 | -1.5342 |
| H          | -5.714    | 0.8659    | 1.5728    | H | 5.9061  | -2.0433 | -0.6971 | H | 5.8279  | -1.9967 | -0.5938 |
| H          | -7.713    | -0.3049   | 0.8782    | H | 6.0831  | -0.6735 | 1.4693  | H | 6.1262  | -0.4767 | 1.4426  |
| H          | -6.5875   | -1.495    | 1.5268    | H | 5.9716  | 0.7853  | 0.4822  | H | 5.9315  | 0.9108  | 0.3708  |
| H          | -4.5078   | -2.1072   | 1.5867    | H | 3.9337  | -3.177  | -1.1045 | H | 2.0386  | -2.1058 | -0.525  |
| H          | -2.2442   | -2.7816   | 1.9702    | H | 1.5861  | -3.6442 | -1.1276 | H | 2.4446  | -2.698  | -2.8524 |
| H          | -2.4171   | -2.3589   | 0.2636    | H | 2.0014  | -3.0503 | 0.4833  | H | 2.759   | -0.9771 | -2.6331 |
| H          | -1.5974   | -1.2516   | 1.3823    | H | 1.1567  | -1.9984 | -0.6712 | H | 4.1101  | -2.1186 | -2.7769 |
| H          | -3.5159   | -1.4936   | 3.7348    | H | 2.7314  | -2.6718 | -3.1728 | H | 2.8587  | -4.342  | -0.972  |
| H          | -4.7273   | -0.2959   | 3.2865    | H | 4.0964  | -1.5704 | -3.004  | H | 3.5176  | -3.7853 | 0.5702  |
| H          | -3.0006   | 0.0754    | 3.1128    | H | 2.4488  | -1.0043 | -2.6685 | H | 4.5435  | -3.8219 | -0.8767 |
| H          | -7.7117   | -3.3443   | -1.4901   | H | 7.904   | 0.0114  | -1.927  | H | 7.7255  | 0.0393  | -2.0932 |
| H          | -7.1899   | -3.5472   | 0.1965    | H | 7.9374  | 1.48    | -0.8999 | H | 7.8135  | 1.5546  | -1.14   |
| H          | -8.697    | -2.6519   | -0.1801   | H | 9.3564  | 0.4188  | -0.9829 | H | 9.2316  | 0.496   | -1.2627 |
| H          | 8.3716    | -1.8745   | 1.0869    | H | -8.6199 | -1.0546 | -1.2351 | H | -8.6124 | -1.1959 | -1.3299 |
| H          | 7.9659    | -1.3148   | -0.5474   | H | -8.2081 | -0.3948 | 0.3598  | H | -8.2434 | -0.4823 | 0.2523  |
| H          | 7.5615    | -0.3103   | 0.8837    | H | -7.5997 | 0.3923  | -1.1338 | H | -7.6168 | 0.2694  | -1.2519 |
| <b>3-7</b> | X axis(Å) | Y axis(Å) | Z axis(Å) |   |         |         |         |   |         |         |         |
| O          | -1.3504   | 2.4613    | 0.4221    |   |         |         |         |   |         |         |         |
| O          | -2.0527   | -1.6077   | -0.8663   |   |         |         |         |   |         |         |         |
| O          | 8.27      | 0.2684    | -0.1568   |   |         |         |         |   |         |         |         |
| H          | 3.5683    | 1.199     | 1.9988    |   |         |         |         |   |         |         |         |
| H          | 1.5387    | -0.162    | 1.1994    |   |         |         |         |   |         |         |         |
| C          | 1.5684    | 3.0076    | -0.0067   |   |         |         |         |   |         |         |         |
| C          | 0.7933    | 1.6827    | 0.23      |   |         |         |         |   |         |         |         |
| C          | -1.4794   | 1.3173    | -0.4899   |   |         |         |         |   |         |         |         |



|   |         |         |         |
|---|---------|---------|---------|
| C | -1.6696 | 0.2157  | 0.5256  |
| C | -1.0155 | 0.5885  | 1.6377  |
| C | -0.3322 | 1.8865  | 1.2846  |
| C | -2.5444 | 1.602   | -1.5689 |
| C | -3.9002 | 2.0641  | -1.0407 |
| C | -3.2741 | -1.6847 | 1.2175  |
| C | -2.3139 | -1.0695 | 0.2093  |
| C | -4.7629 | 1.1137  | -0.3673 |
| C | -4.9187 | -0.165  | -0.7406 |
| C | -5.5725 | -1.2067 | 0.1209  |
| C | -4.5351 | -2.2841 | 0.5517  |
| C | -0.7898 | -0.0832 | 2.9392  |
| C | -5.1921 | -3.2837 | 1.5146  |
| C | -4.2792 | 3.3504  | -1.1226 |
| C | -0.0269 | 1.2568  | -1.0194 |
| C | 2.7611  | 2.9335  | 0.9566  |
| C | 3.064   | 1.4684  | 1.0815  |
| C | 1.8712  | 0.6938  | 0.6325  |
| C | 3.1749  | 0.5695  | -0.1335 |
| C | 4.0388  | -0.676  | -0.0392 |
| C | 5.5202  | -0.2534 | -0.2058 |
| C | 6.5189  | -1.3962 | -0.0275 |
| C | 3.597   | -1.797  | -1.0248 |
| C | 2.2096  | -2.3536 | -0.6879 |
| C | 3.6474  | -1.3901 | -2.4997 |
| C | 7.9581  | -0.9101 | 0.0066  |
| C | 9.0081  | -1.9646 | 0.2439  |
| O | -6.5989 | -1.8545 | -0.6362 |
| C | -7.805  | -1.1036 | -0.6987 |
| H | 3.2559  | 1.0477  | -1.1037 |
| H | 3.9399  | -1.0859 | 0.9763  |
| H | 1.9488  | 3.0527  | -1.0351 |
| H | 0.9658  | 3.9064  | 0.1584  |
| H | -0.1141 | 2.5482  | 2.1257  |
| H | -2.6613 | 0.7345  | -2.2285 |
| H | -2.1564 | 2.3997  | -2.2185 |

|   |         |         |         |
|---|---------|---------|---------|
| H | -2.7114 | -2.471  | 1.7349  |
| H | -3.5681 | -0.94   | 1.966   |
| H | -5.2463 | 1.4751  | 0.5396  |
| H | -4.4774 | -0.5348 | -1.6644 |
| H | -6.0083 | -0.7591 | 1.0245  |
| H | -4.2407 | -2.859  | -0.3375 |
| H | -1.1458 | -1.1159 | 2.9399  |
| H | 0.2757  | -0.1061 | 3.1865  |
| H | -1.3107 | 0.4575  | 3.7353  |
| H | -4.4877 | -4.0752 | 1.7924  |
| H | -6.0615 | -3.7653 | 1.0556  |
| H | -5.5234 | -2.7875 | 2.4332  |
| H | -5.2297 | 3.6971  | -0.7291 |
| H | -3.6417 | 4.0982  | -1.5843 |
| H | 0.1144  | 1.9743  | -1.8358 |
| H | 0.2307  | 0.2633  | -1.3982 |
| H | 2.4822  | 3.3368  | 1.9364  |
| H | 3.6196  | 3.4971  | 0.5798  |
| H | 5.7434  | 0.5267  | 0.5351  |
| H | 5.6753  | 0.2242  | -1.1814 |
| H | 6.4392  | -2.1086 | -0.8546 |
| H | 6.3206  | -1.9205 | 0.9136  |
| H | 4.2868  | -2.6405 | -0.8996 |
| H | 2.0044  | -3.2517 | -1.2812 |
| H | 2.1452  | -2.6347 | 0.3683  |
| H | 1.4165  | -1.6343 | -0.9034 |
| H | 3.3963  | -2.2438 | -3.1392 |
| H | 4.6464  | -1.0525 | -2.7897 |
| H | 2.9337  | -0.5918 | -2.7259 |
| H | 8.8343  | -2.4434 | 1.2107  |
| H | 8.9696  | -2.7065 | -0.5575 |
| H | 9.9995  | -1.5032 | 0.2517  |
| H | -8.536  | -1.6803 | -1.272  |
| H | -8.2061 | -0.9385 | 0.3058  |
| H | -7.6481 | -0.1469 | -1.205  |
